# Supplementary material for: Experimental results and computational insight into sequential reactions of β-(2-aminophenyl)-α,β-ynones with aryl isocyanates/benzoyl isothiocyanate
Source: Royal Society of Chemistry journal article supplement (doi:10.1039/d0ob00087f), 2020-01-01
Supplement: d0ob00087f1.pdf [file d0ob00087f1.pdf]

## Supplementary Information

### Experimental Results and Computational Insight into Sequential Reactions of $\beta$ -(2-aminophenyl)- $\alpha,\beta$ -Ynones with Aryl Isocyanates/Benzoyl Isothiocyanate

Antonio Arcadi,<sup>\*a</sup> Massimiliano Aschi,<sup>\*a</sup> Marco Chiarini,<sup>b</sup> Fabio Marinelli,<sup>a</sup> Vincenzo Marsicano,<sup>a</sup> and Gustavo Portalone.<sup>c</sup>

<sup>a</sup> Dipartimento di Scienze Fisiche e Chimiche Università degli Studi di L'Aquila; Via Vetoio, 67100 Coppito (AQ), Italy

e-mail: [antonio.arcadi@univaq.it](mailto:antonio.arcadi@univaq.it); [massimiliano.aschi@univaq.it](mailto:massimiliano.aschi@univaq.it)

<sup>b</sup> Facoltà di Bioscienze e Tecnologie Agro-alimentari e Ambientali, Università di Teramo, Via Balzarini 1, 64100 Teramo (TE), Italy

<sup>c</sup> Dipartimento di Chimica, Sapienza Università di Roma, P.le A. Moro 5, 00185 Roma, Italy

#### Contents:

|                                                                                                     |            |
|-----------------------------------------------------------------------------------------------------|------------|
| <b>Kinetic calculations .....</b>                                                                   | <b>S2</b>  |
| <b>Copies of <sup>1</sup>H and <sup>13</sup>C NMR Spectra .....</b>                                 | <b>S5</b>  |
| <b>NMR - Structural characterization in solution .....</b>                                          | <b>S24</b> |
| <b>Crystal packing.....</b>                                                                         | <b>S39</b> |
| <b>Quantum-Chemical calculations: optimized geometries, energies, and Harmonic frequencies.....</b> | <b>S41</b> |

## Kinetic calculations.

In order to assess whether the proposed mechanism is consistent with the experimental findings we have estimated the kinetics of the two reactions. The Kinetic Master Equation has been constructed using the reported free energy diagrams and adopting the Eyring equation

$$k = \frac{k_B T}{h} e^{-\frac{\Delta G^\ddagger}{RT}}$$

for the estimation of the reactions coefficients.

### Scheme 1. Master equation based on the kinetic Scheme in Figure S01.

$$\frac{d[R_1]}{dt} = -k_1[R_1][R_2] + k_{-1}[2A]$$

$$\frac{d[R_2]}{dt} = -k_1[R_1][R_2] + k_{-1}[2A]$$

$$\frac{d[2A]}{dt} = k_1[R_1][R_2] - k_{-1}[2A] - k_2[2A][NEt_3]$$

$$\frac{d[3A]}{dt} = k_{-1}[2A] + k_{-N}[N_1^-] + k_{-O}[O_1^-] - (k_N + k_O)[3A]$$

$$\frac{d[N_1^-]}{dt} = k_N[3A] - (k_{-N} + k_d[NEt_3H^+])[N_1^-]$$

$$\frac{d[O_1^-]}{dt} = k_O[3A] - (k_{-O} + k_d[NEt_3H^+])[O_1^-]$$

$$\frac{d[N_1]}{dt} = k_d[NEt_3H^+][N_1^-]$$

$$\frac{d[O_1]}{dt} = k_d[NEt_3H^+][O_1^-] - k_5[O_1][NEt_3]$$

$$\frac{d[O_2^-]}{dt} = k_5([NEt_3][O_1] - [NEt_3H^+][O_2^-])$$

$$\frac{d[O_2]}{dt} = k_5[NEt_3H^+][O_2^-]$$

$$\frac{d[NEt_3]}{dt} = -k_2[2A][NEt_3] + k_d[N_1^-][NEt_3H^+] + k_d[O_1^-][NEt_3H^+]$$

$$\frac{d[NEt_3H^+]}{dt} = k_2[2A] - k_d[NEt_3H^+][N_1^-] - k_d[NEt_3H^+][O_1^-]$$

**Scheme 2. Master equation based on the kinetic Scheme in Figure S02.**

$$\frac{d[R_1]}{dt} = -k_1[R_1][R_2] + k_{-1}[1B] - k_5[CO_3^-][R_1]$$

$$\frac{d[R_2]}{dt} = -k_1[R_1][R_2] + k_{-1}[1B] - k_6[R_1^-]$$

$$\frac{d[1B]}{dt} = k_1[R_1][R_2] + k_{-3}[3B] - k_{-1}[1B] - k_2[1B] - k_3[1B] - k_d[CO_3^{2-}][1B]$$

$$\frac{d[2B]}{dt} = k_2[1B] - k[2B] - k_d[2B][CO_3^{2-}]$$

$$\frac{d[3B]}{dt} = k_3[1B] - k_{-3}[3B] - k_d[3B][CO_3^{2-}]$$

$$\frac{d[1B^-]}{dt} = k_6[R_1^-][R_2] - k_4[1B^-] + k_{-4}[3B^-] + k[CO_3^-][1B] - k_7[1B^-] + k_{-7}[3B^-]$$

$$\frac{d[3B^-]}{dt} = k_d[CO_3^{2-}][3B] + k_4[1B^-] + k_{-4}[3B^-] - k_d[HCO_3^-][3B^-]$$

$$\frac{d[R_1^-]}{dt} = k_5[R_1][CO_3^{2-}] - k_6[R_1^-][R_2]$$

The Kinetic Schemes and the time course of the relevant species obtained by the integration of the above equations, are reported in the Figure S01 and S02. It is important to note that, as previously commented, in our model we have not addressed the explicit calculation of the free energy barriers related to the bimolecular proton transfer channels involving  $CO_3^{2-}$  and  $NEt_3$ . This is a very difficult task since, for a fully quantitative estimation of these processes, quantum effects may play a relevant role and – moreover – the presence of the solvent might severely influence the bimolecular rate coefficients for the formation of the primary encounter complexes. In this study, in which we are not explicitly reporting a kinetic assessment of the reaction under study, we have then assumed that all the proton transfer steps are diffusion-controlled and, for this reason, all these steps are kinetically treated using the diffusion rate constant ( $k_d$ ). This may cause an underestimation of the overall reaction time. It follows that the results presented in this section do not have any quantitative value and their sole purpose is to assess whether the global reaction time predicted by our calculations can be considered as compatible with the times observed in the experiments (order of minutes).

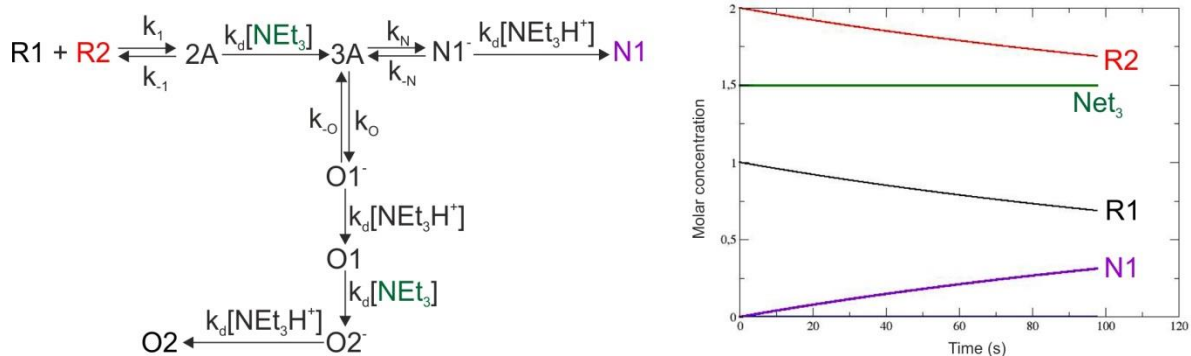

**Figure S01.** Kinetic model (left side, see Figure 1 of the main text for additional details) and time-course of the relevant species for the Reaction A.

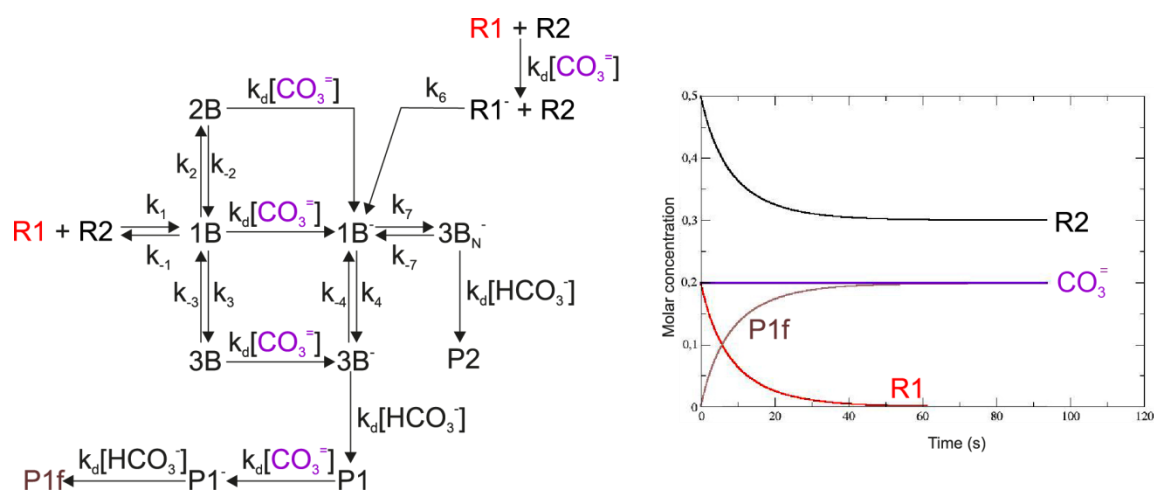

**Figure S02.** Kinetic model (left side, see Figure 4 for additional details) and time-course of the relevant species for the Reaction B.

The formation of the most stable product ( $P_{1f}$ ) has been assumed to occur through a sequence of bimolecular proton-transfer steps involving the carbonate-bicarbonate couple. The results reported in the Figures clearly, although qualitatively, demonstrate that the kinetics emerged by our free-energy are in both the reactions are not incompatible with the times necessary for completing the two reactions. As a matter of fact, in both the cases the reaction is completed or reaches rather high values of progress within the minutes time-scale.

# Copies of $^1\text{H}$ and $^{13}\text{C}$ NMR Spectra:

5aa

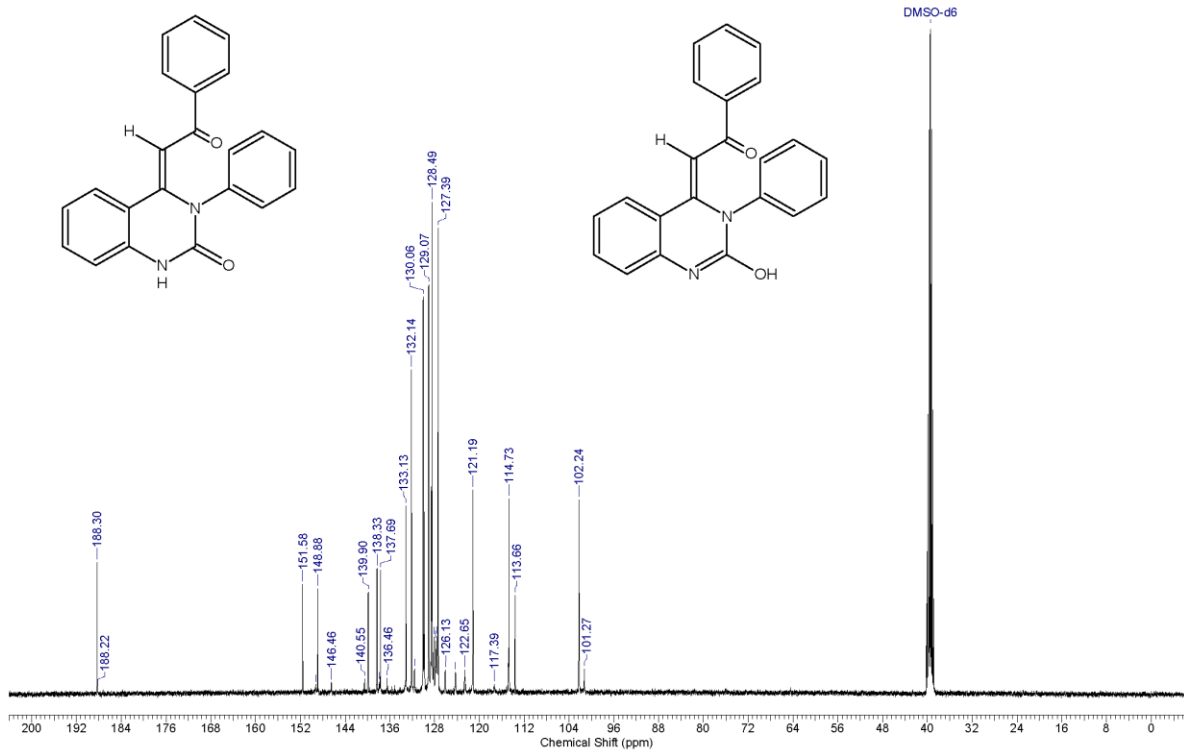

5aa

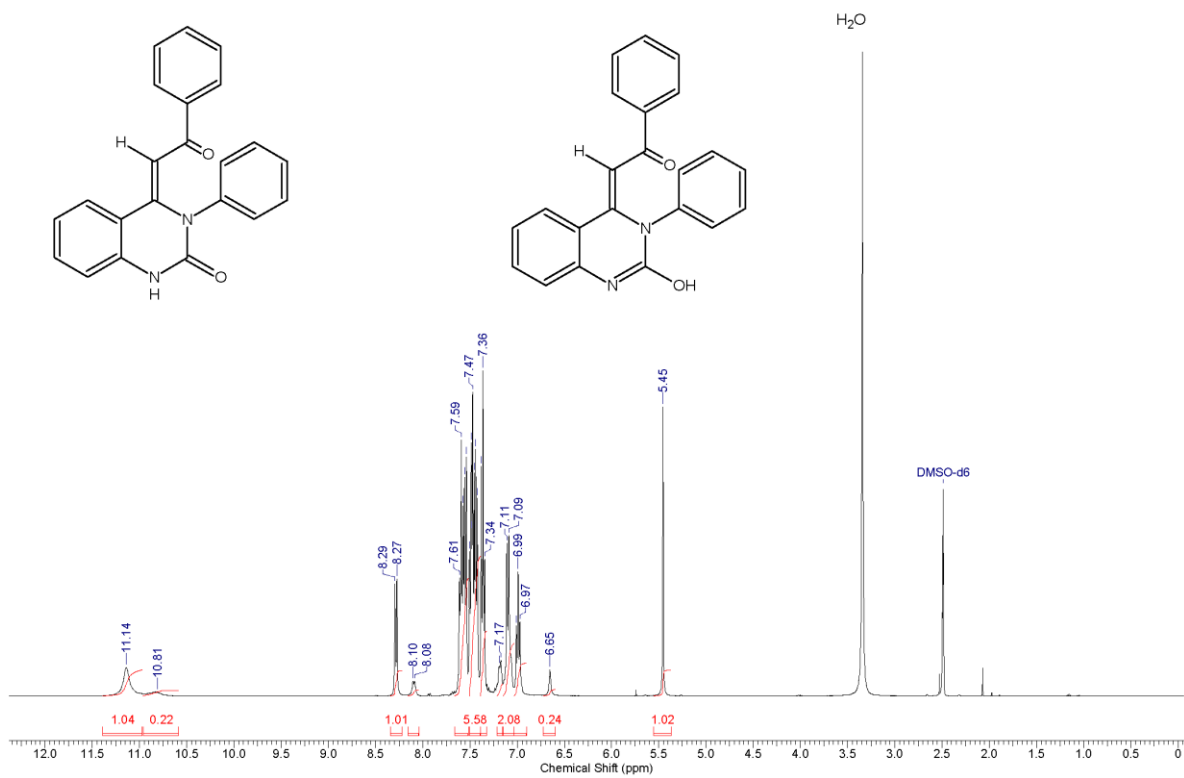

5ab

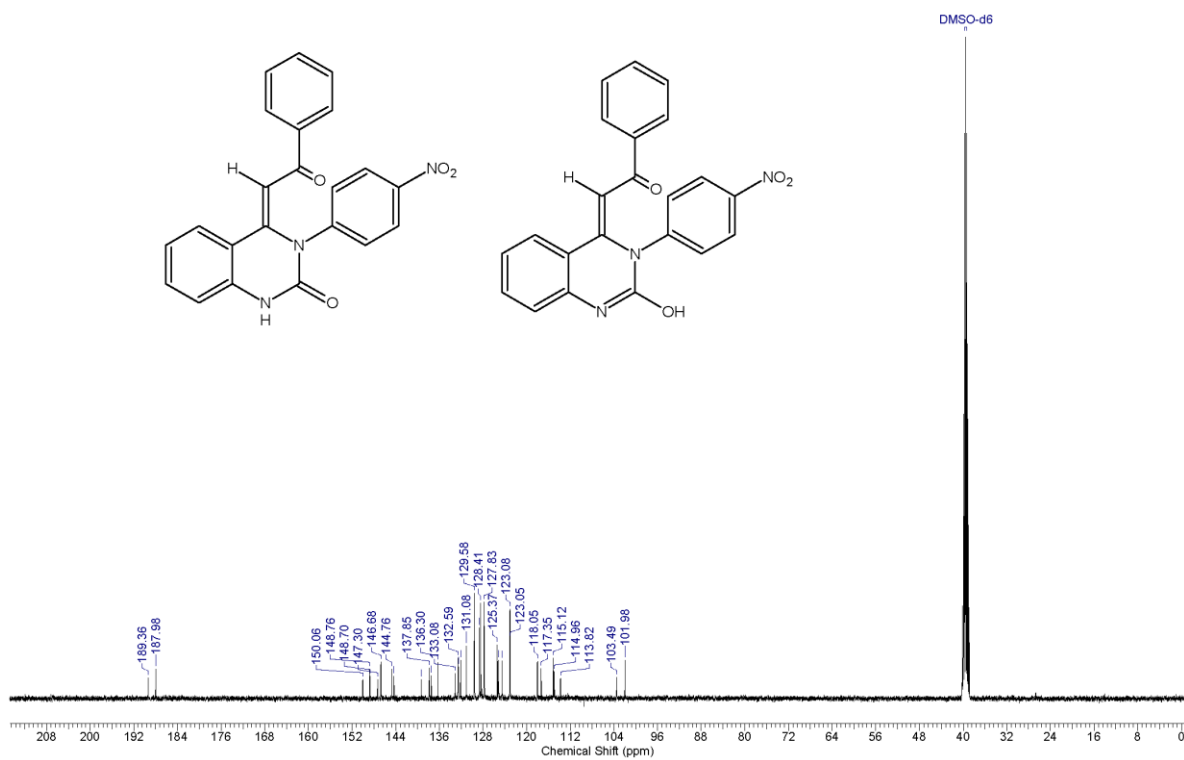

5ab

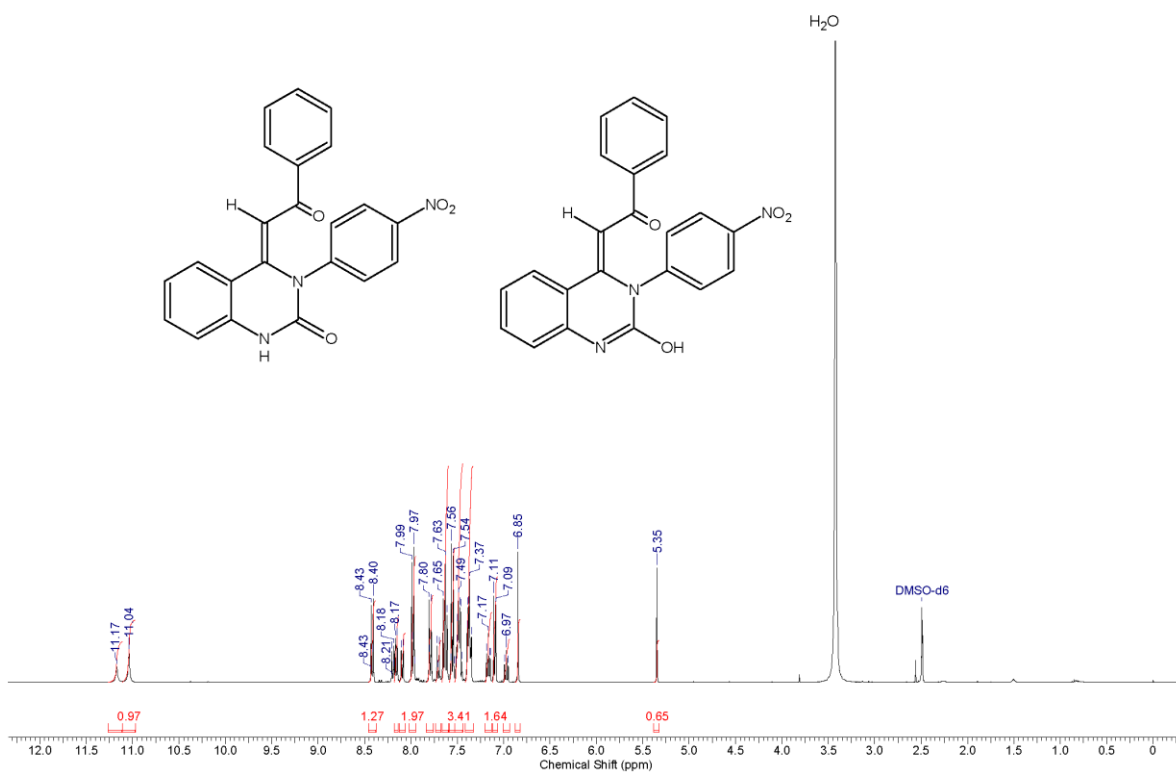

5ac

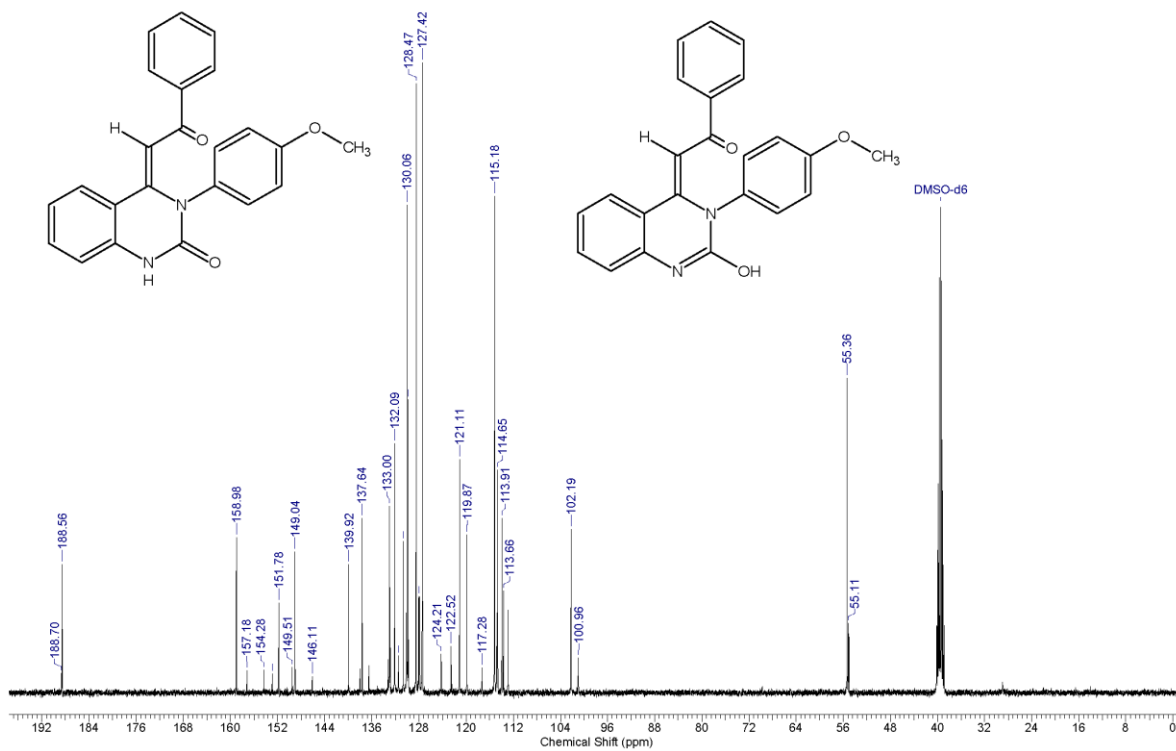

5ac

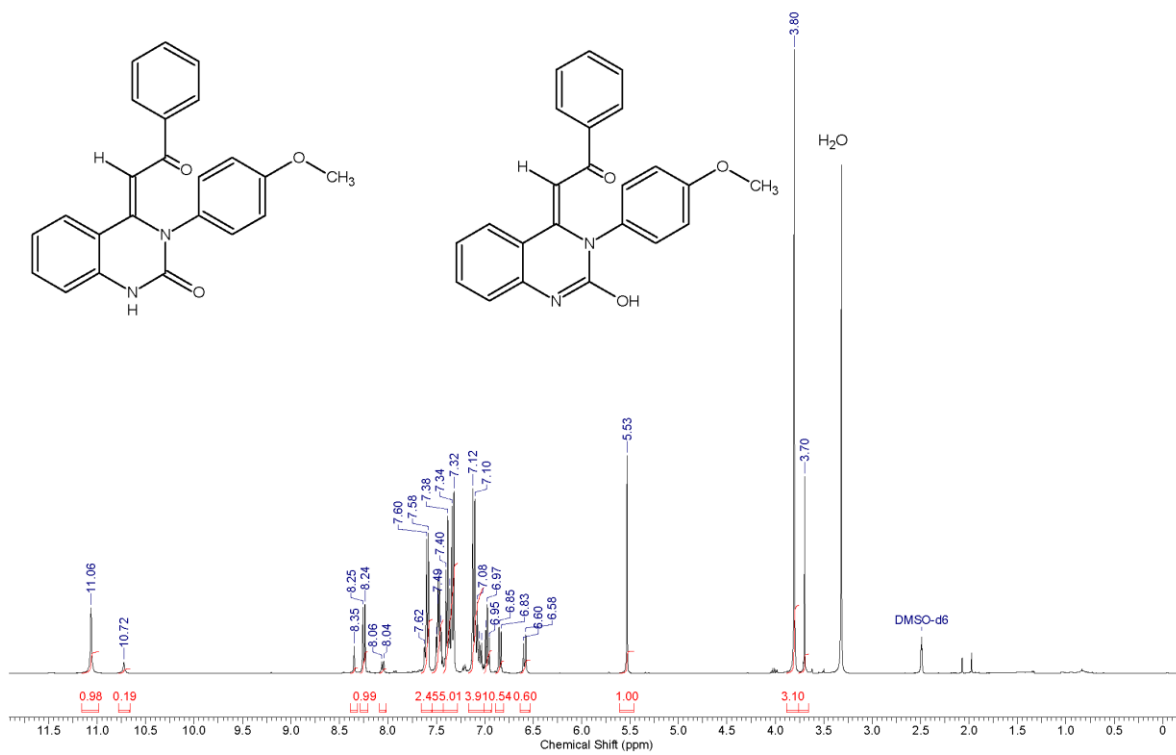

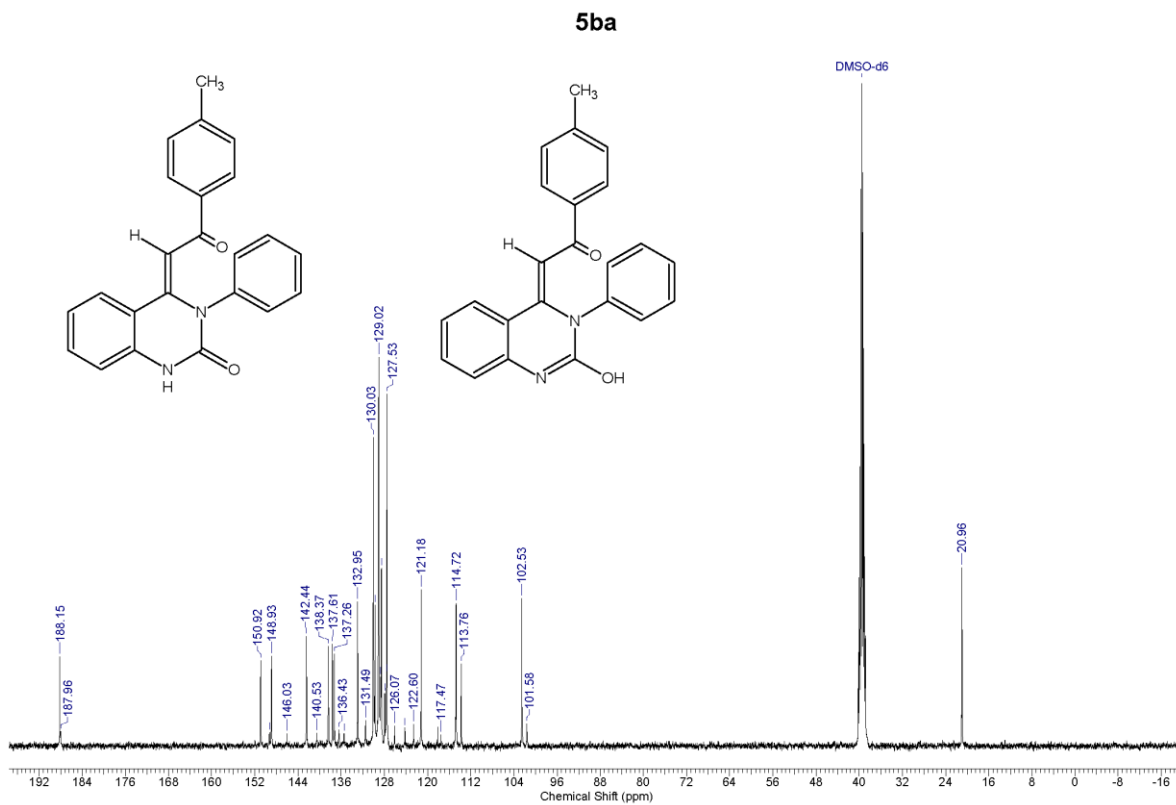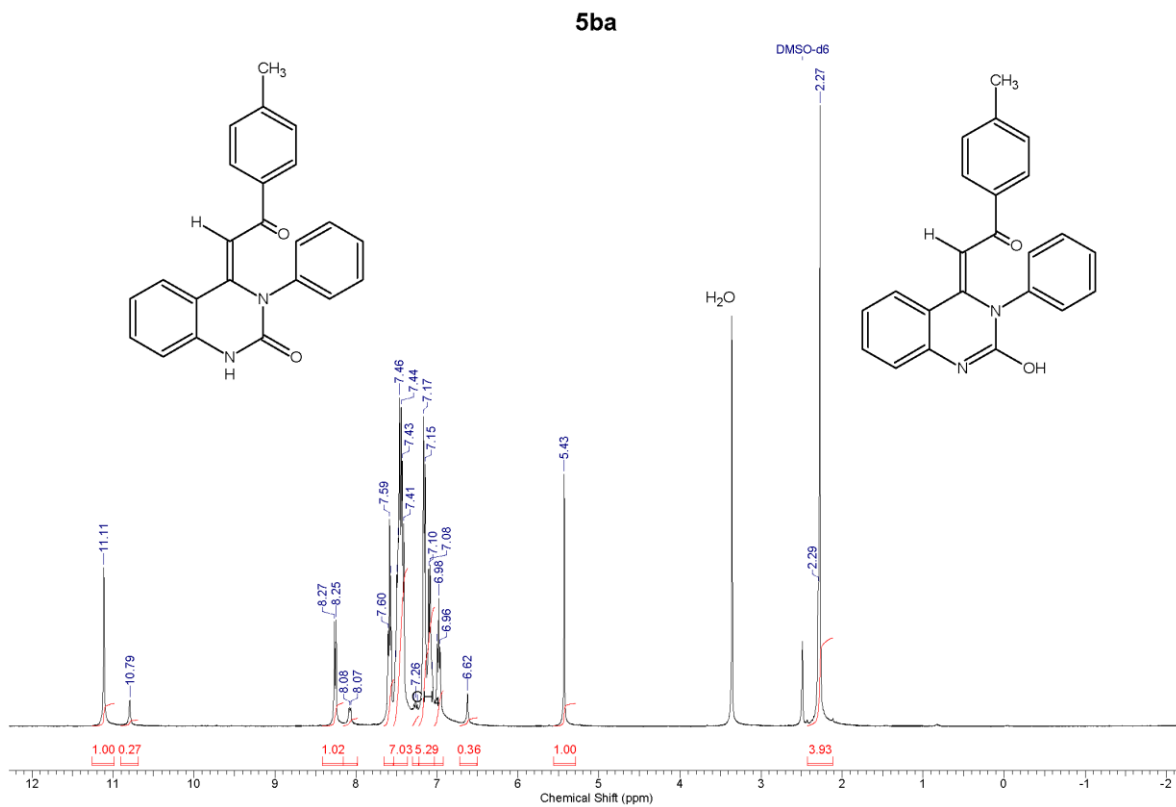



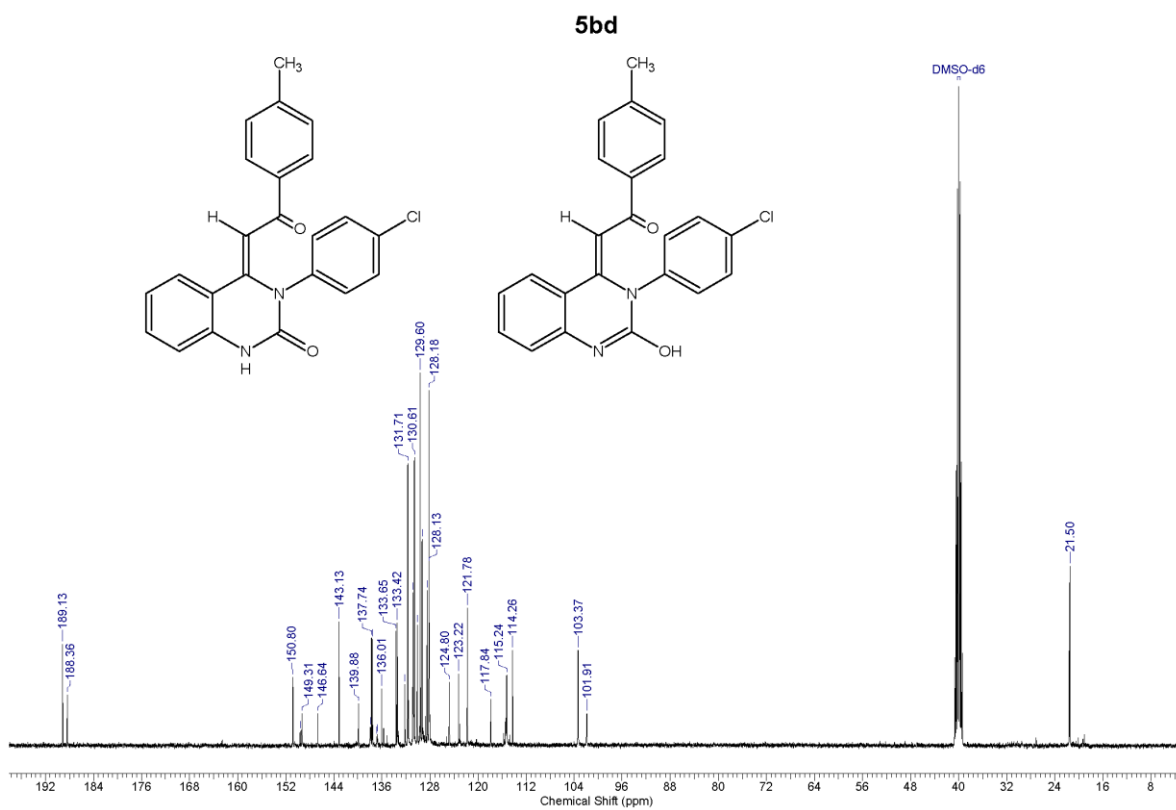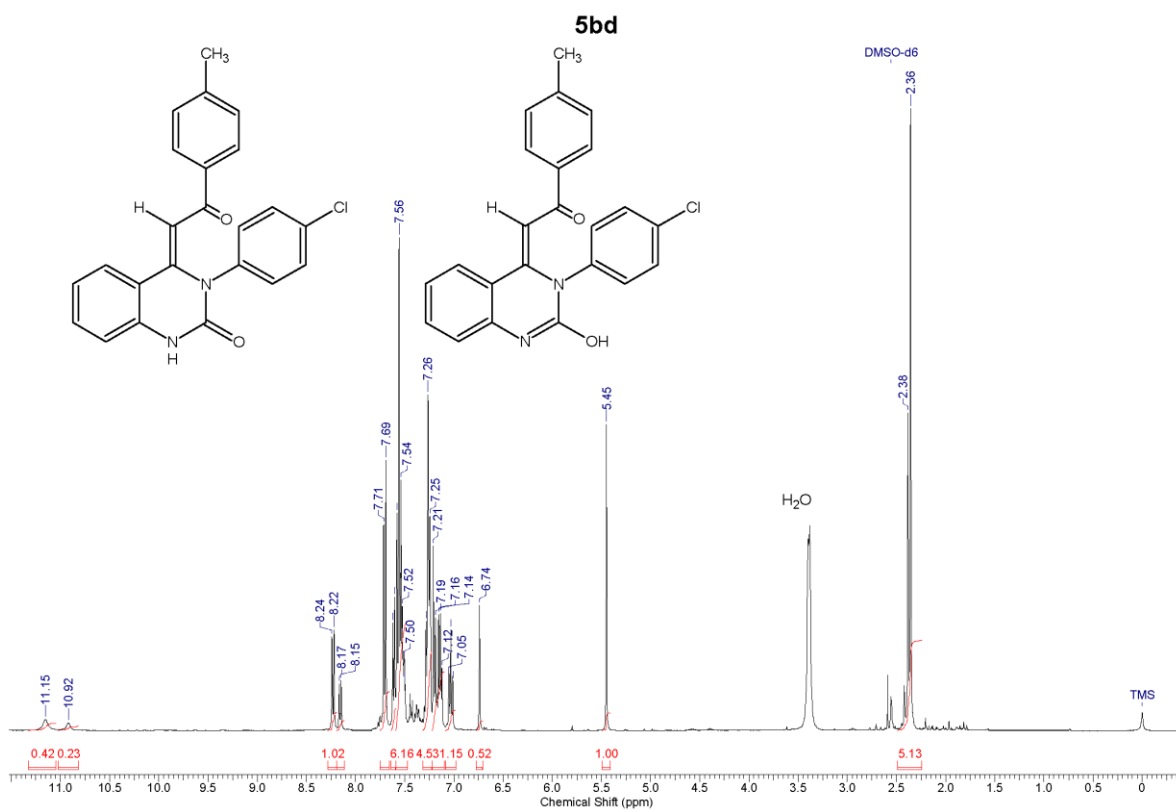

5be

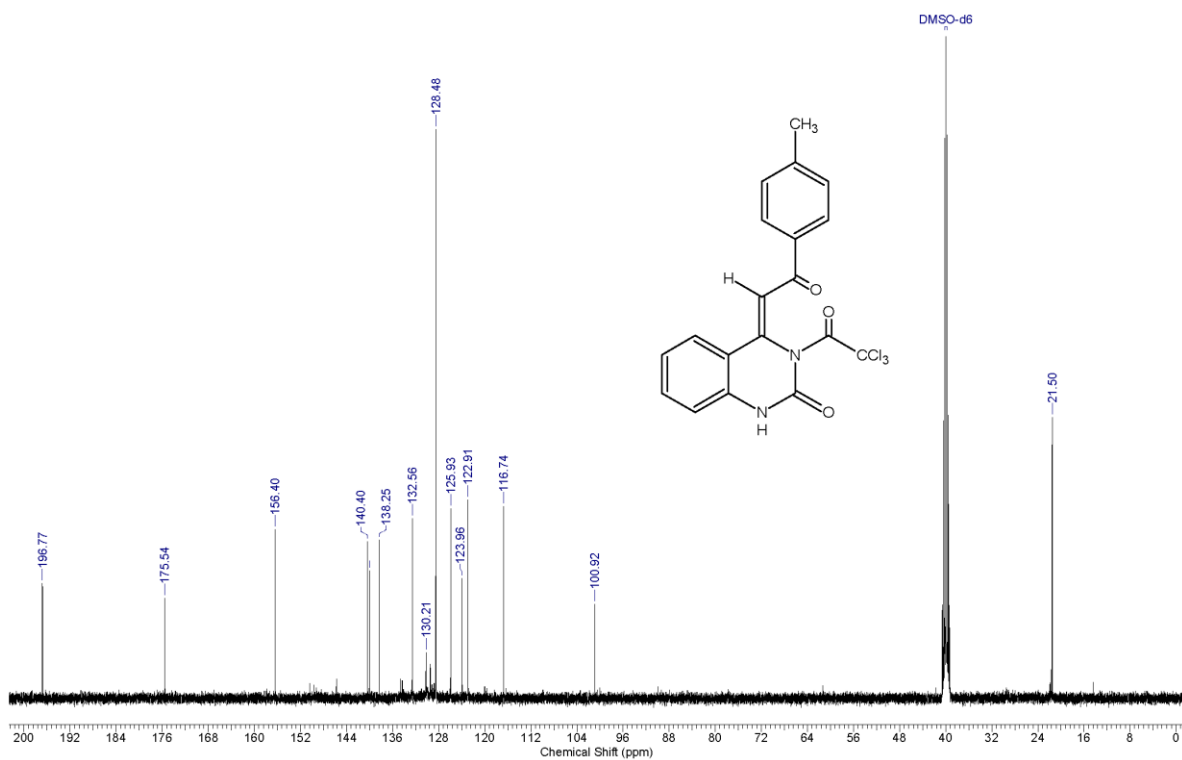

5be

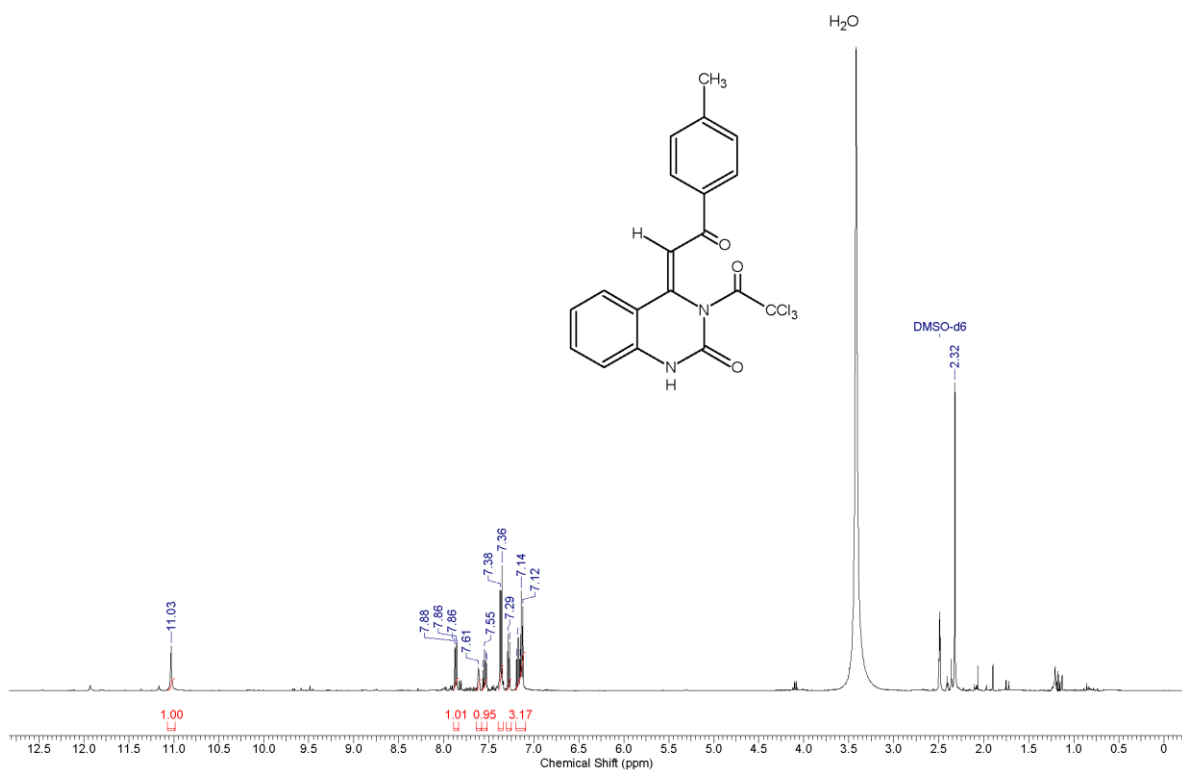

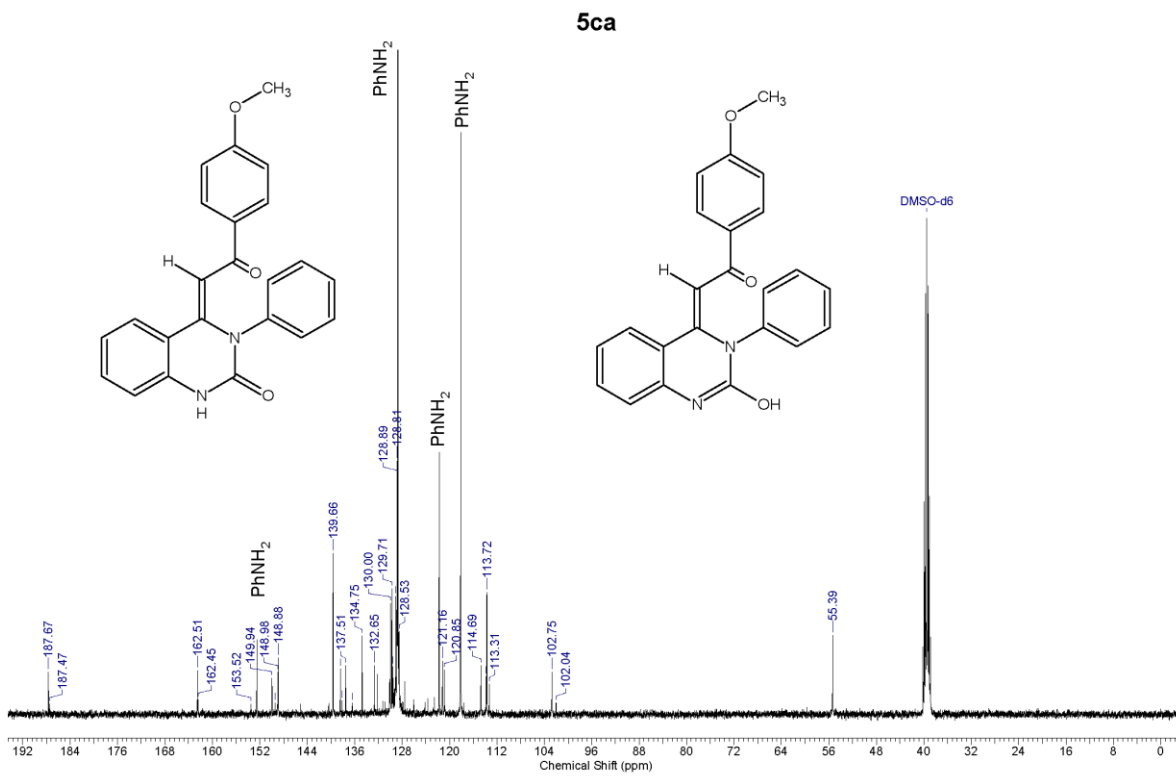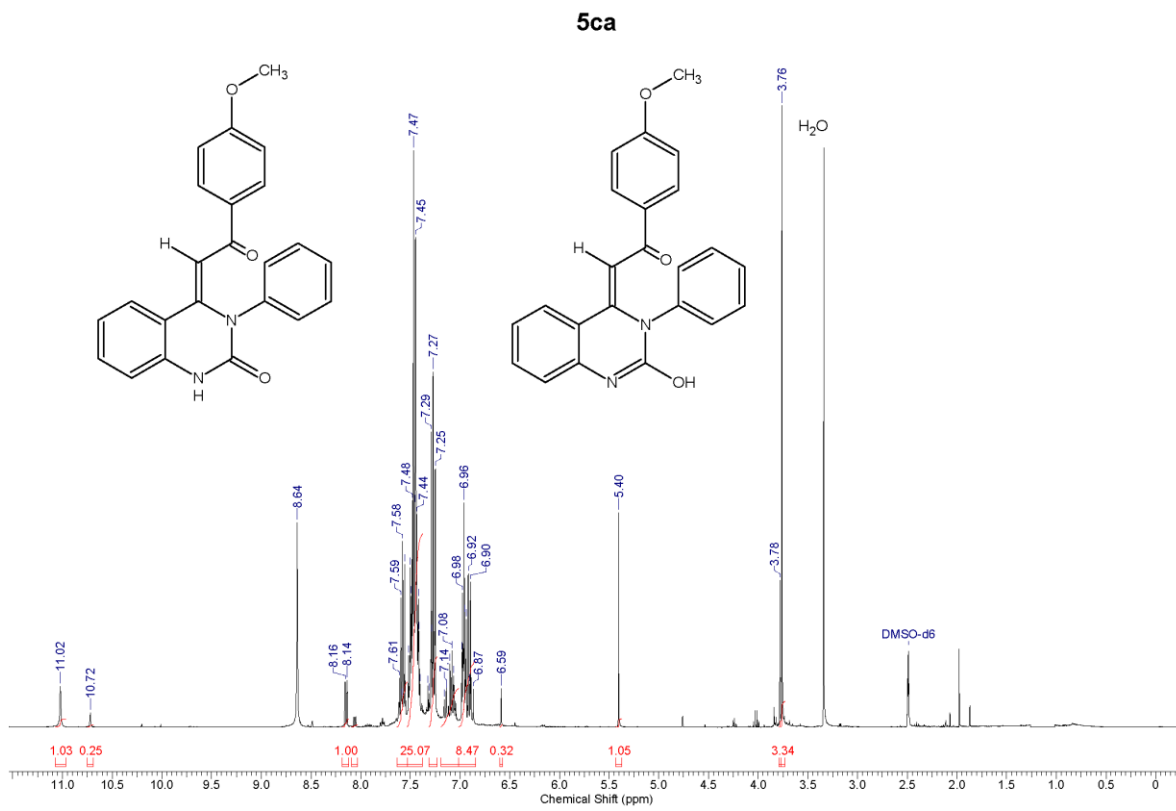

5da

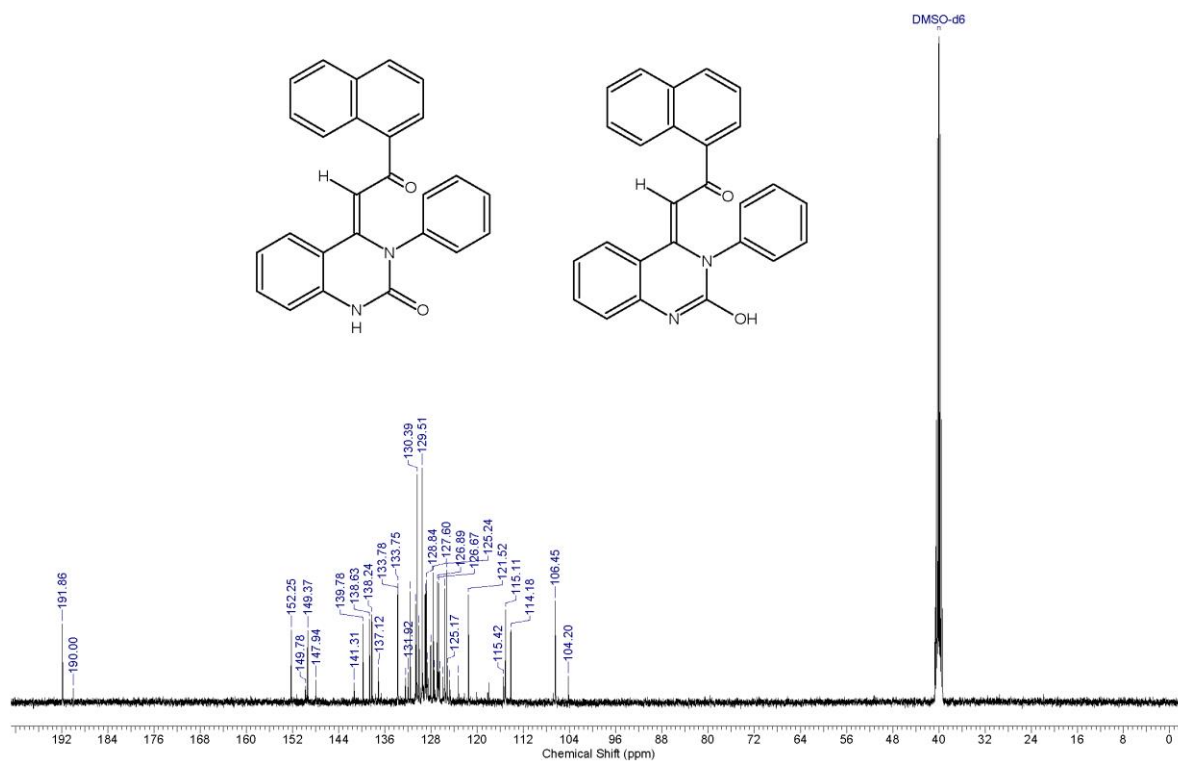

5da

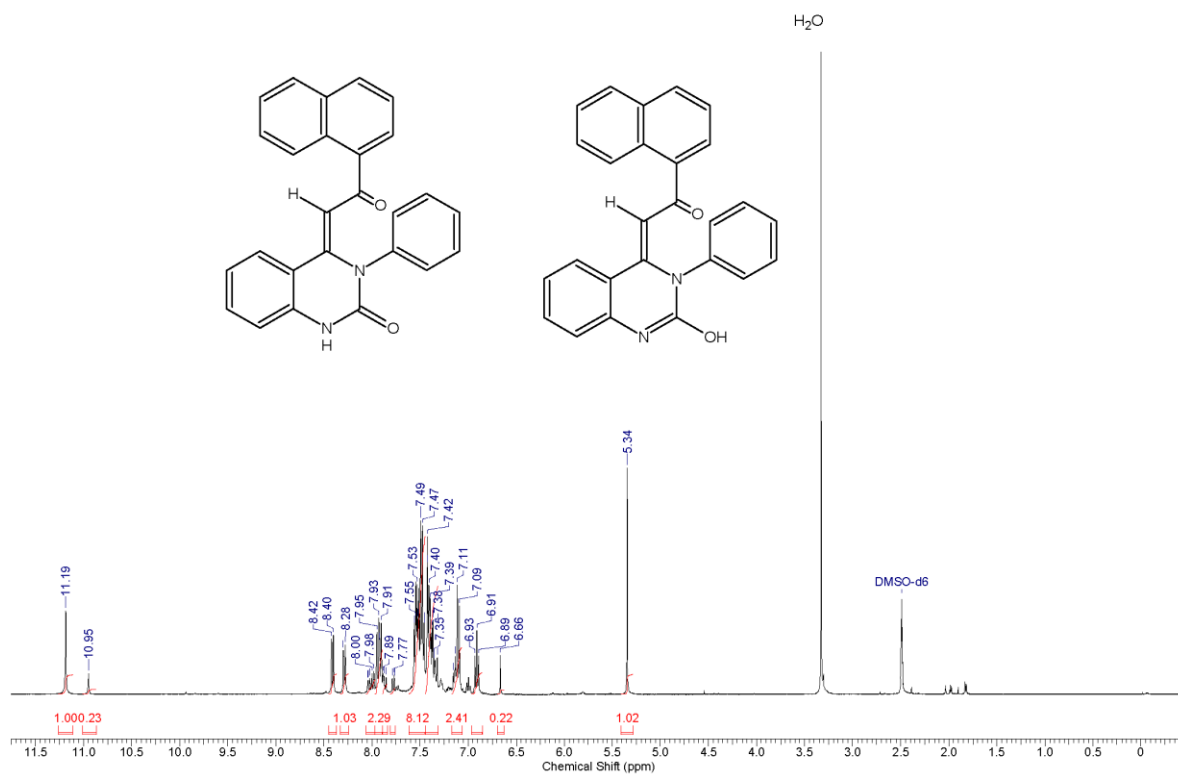

5dd

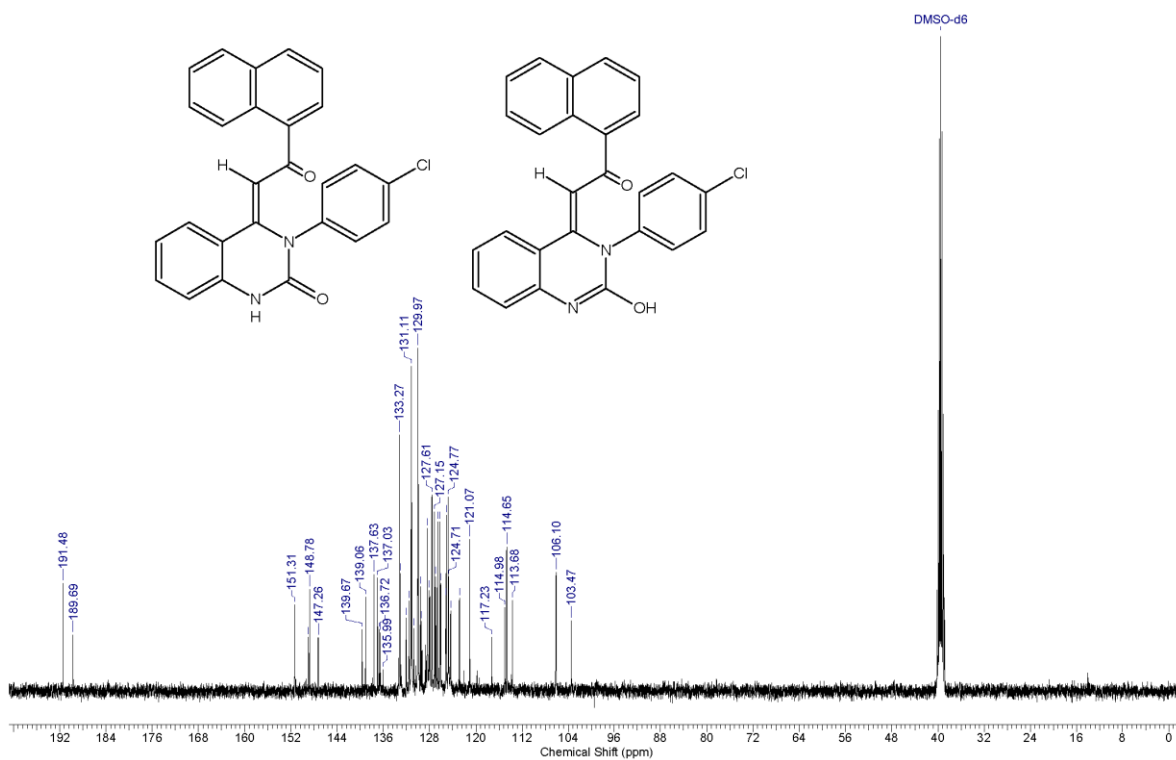

5dd

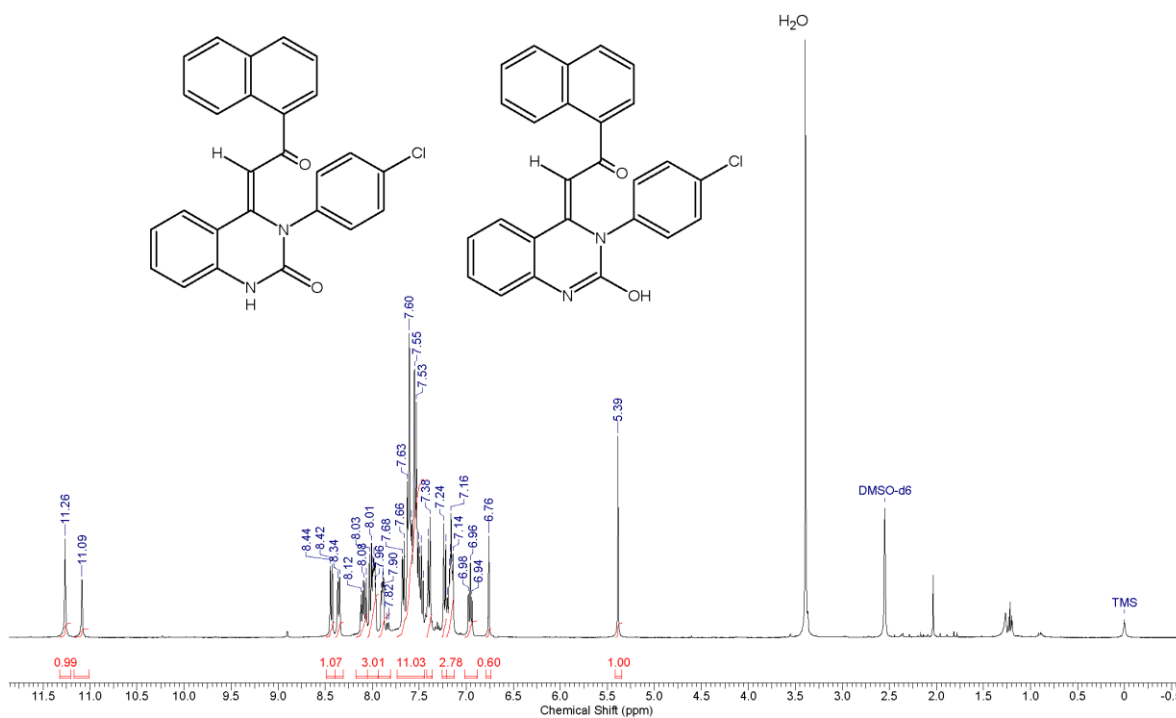

5ea

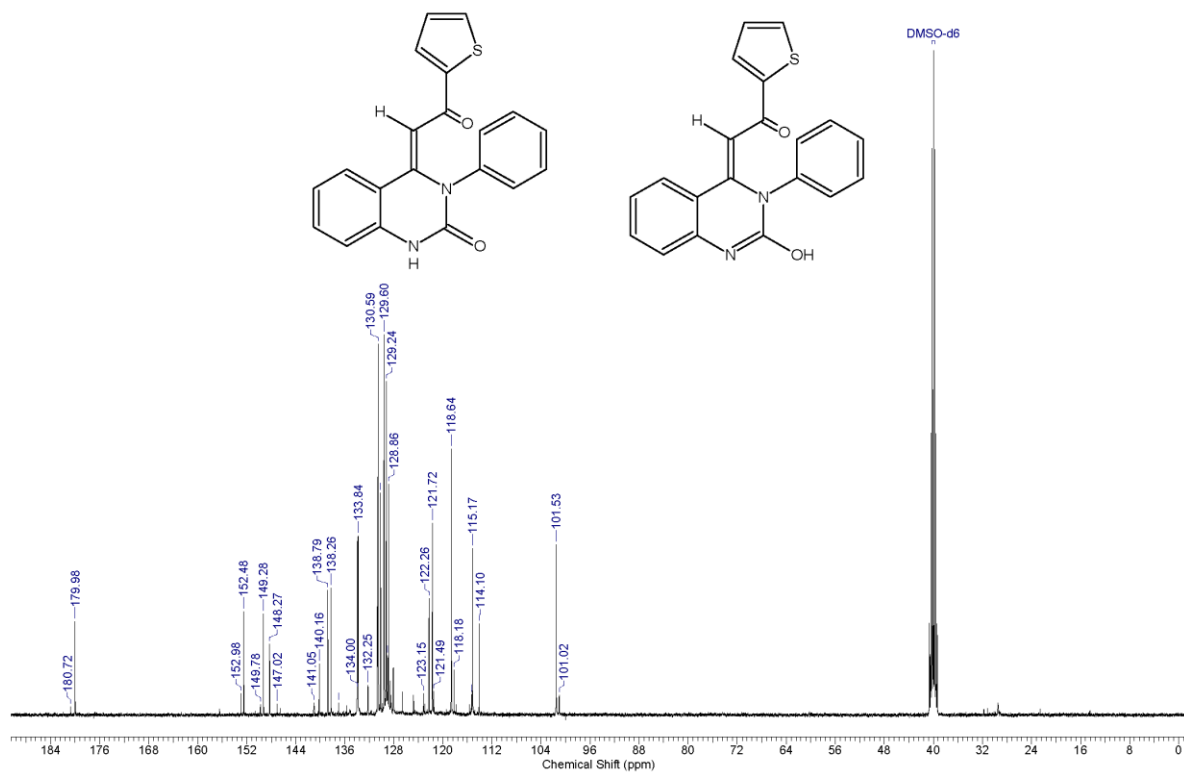

5ea

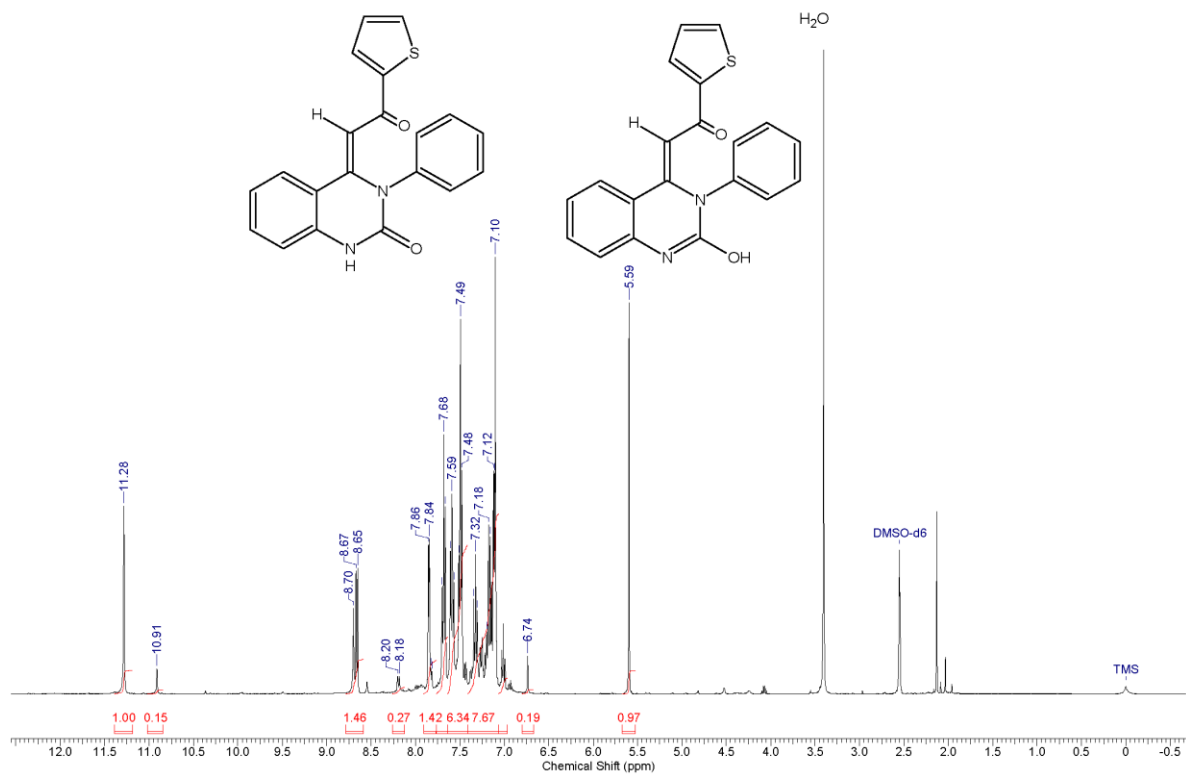

5fa

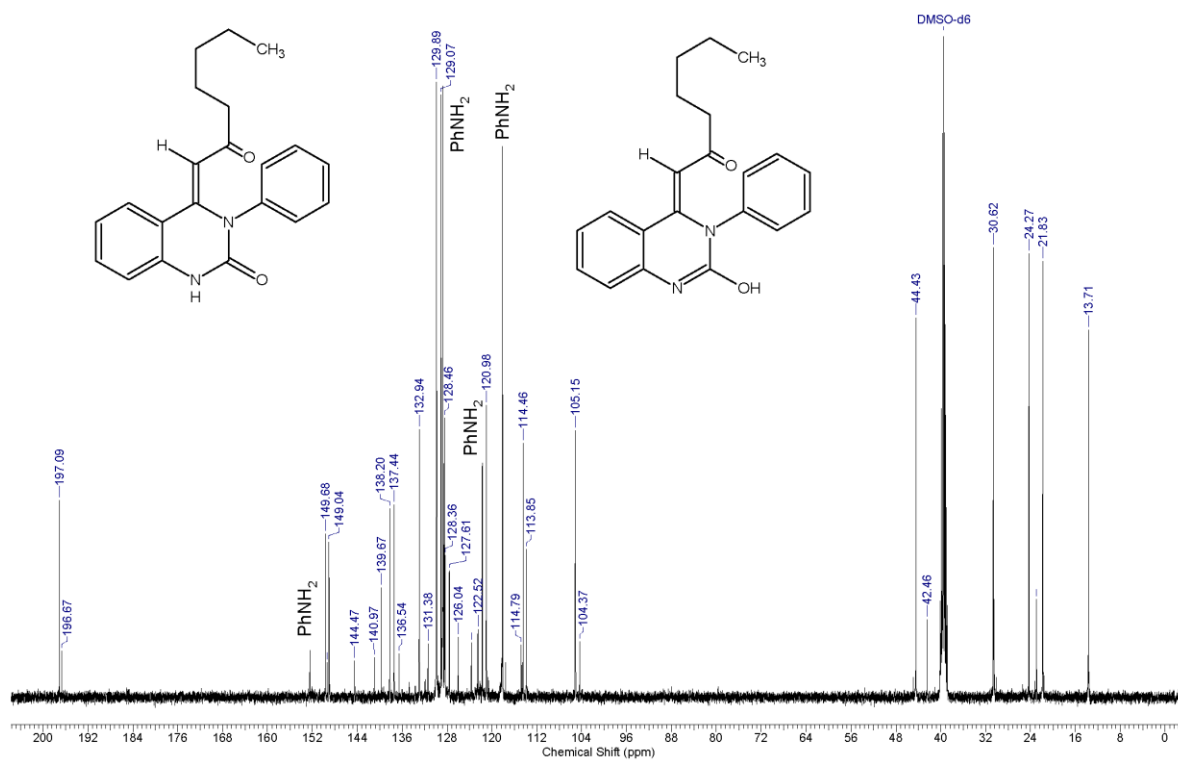

5fa

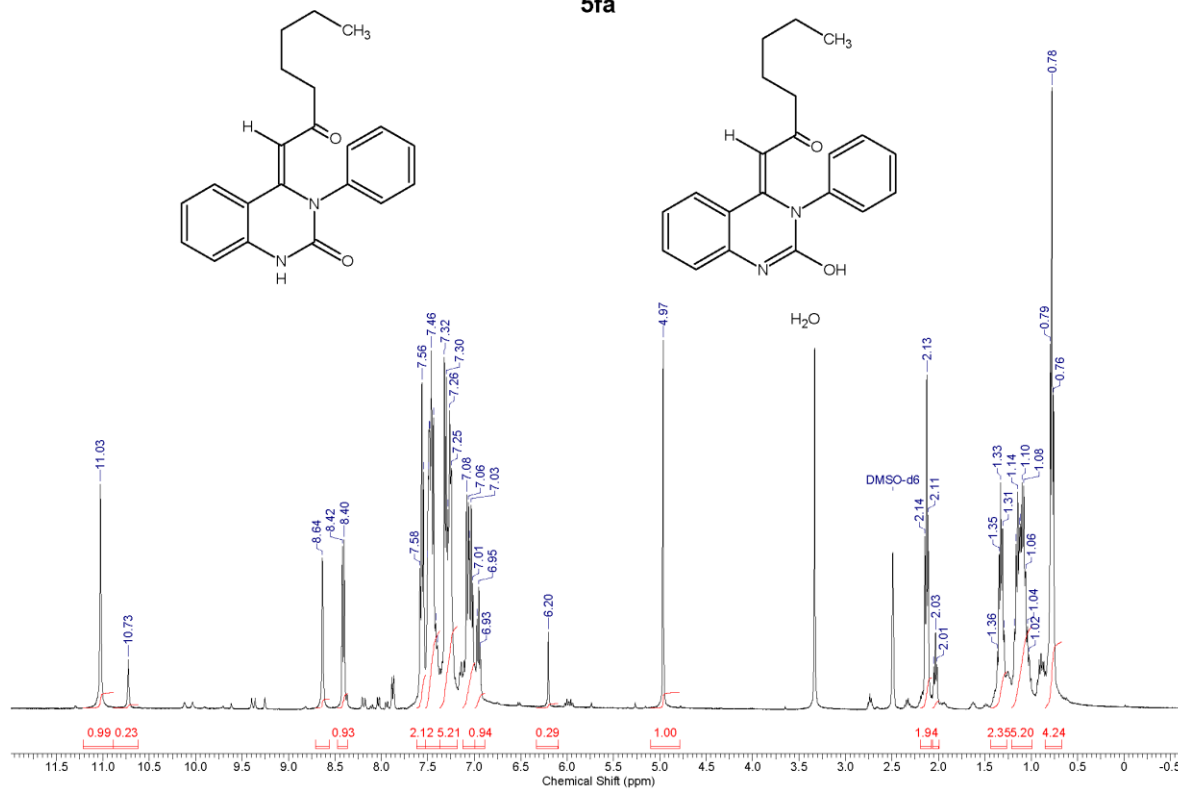

5fd

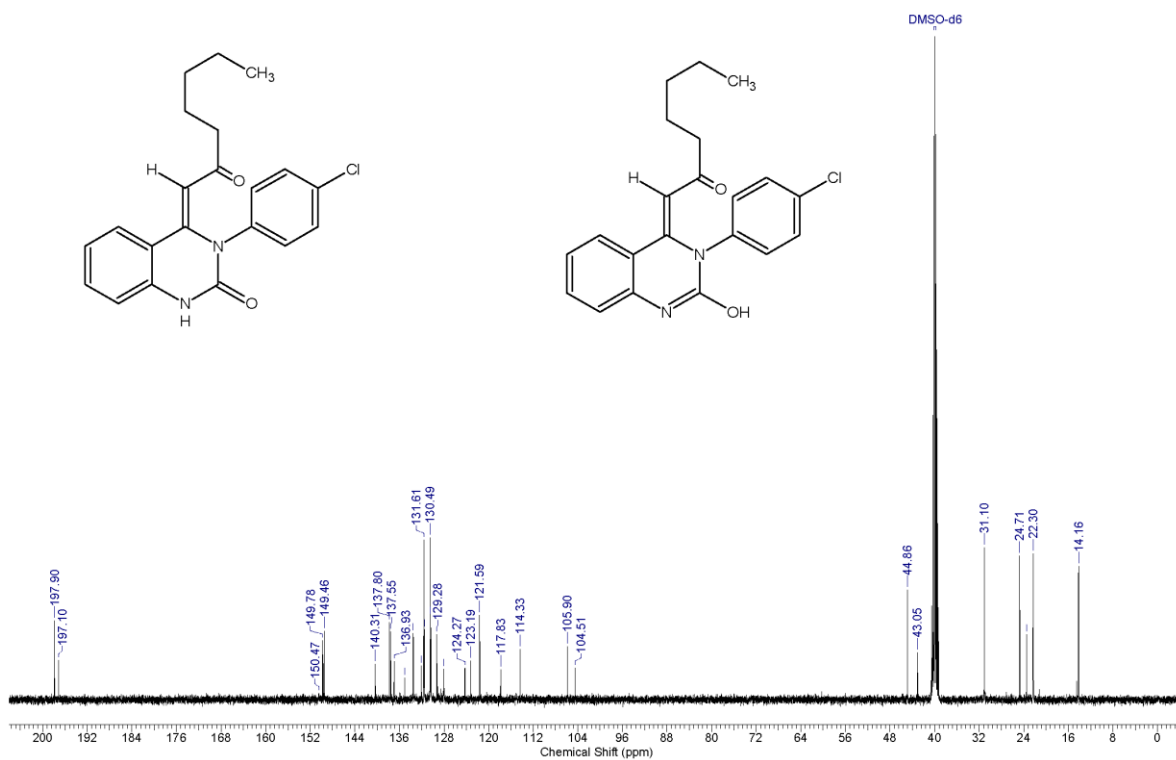

5fd

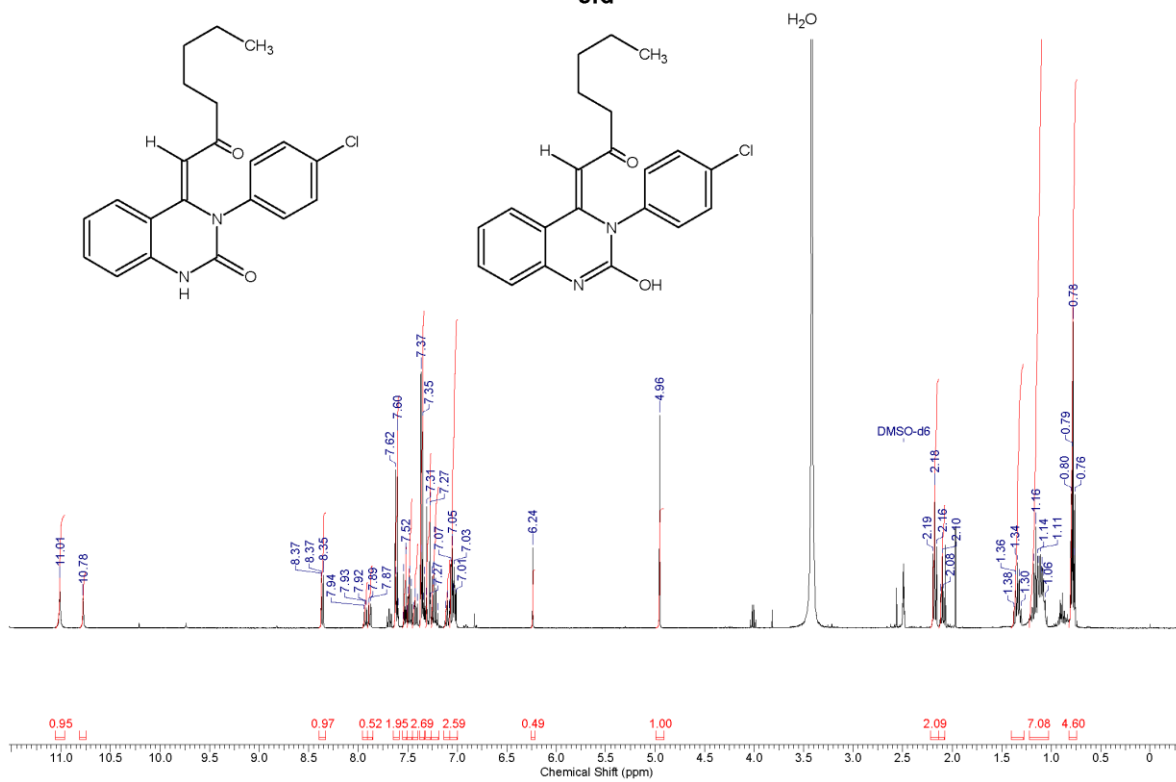



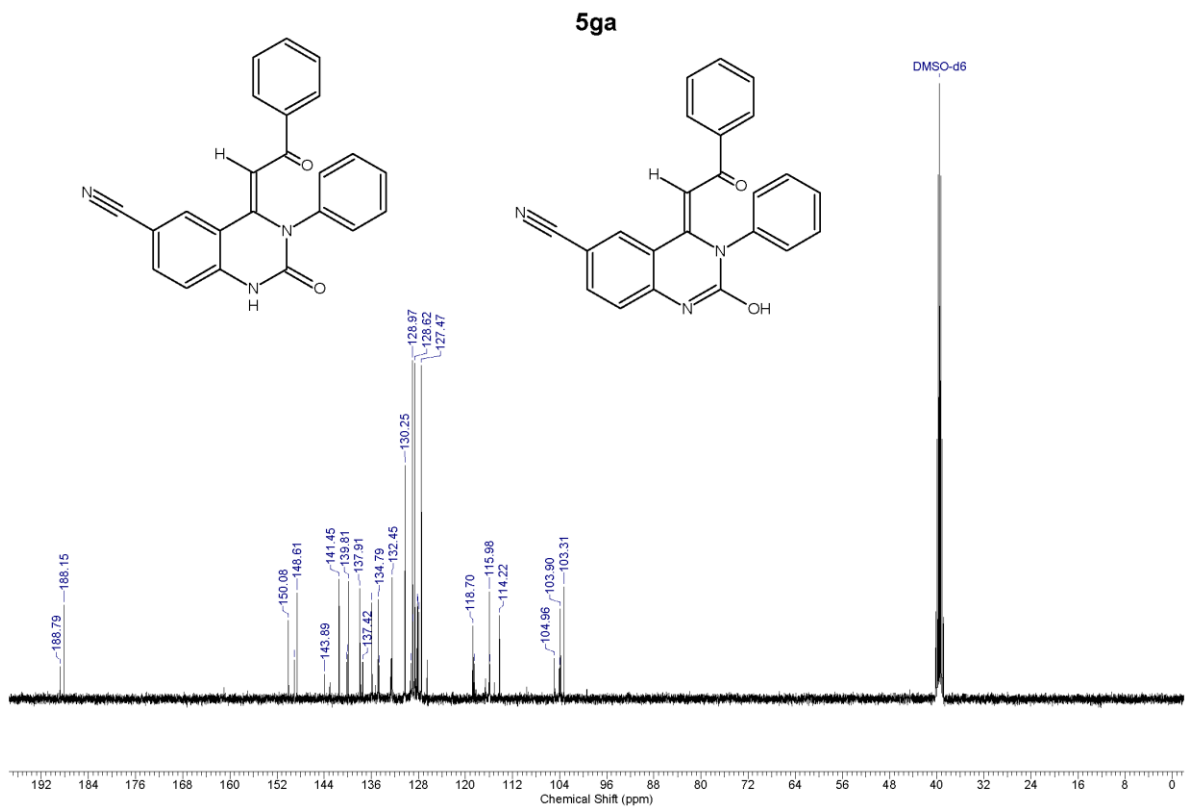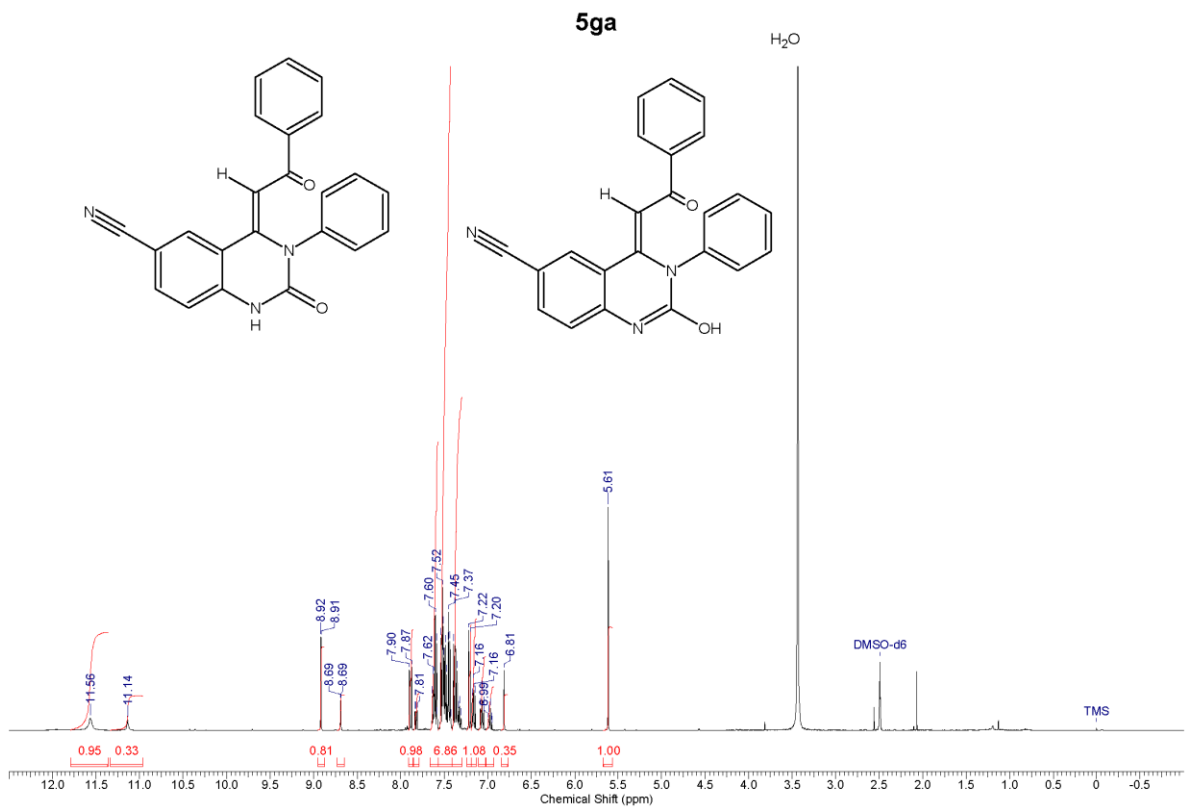

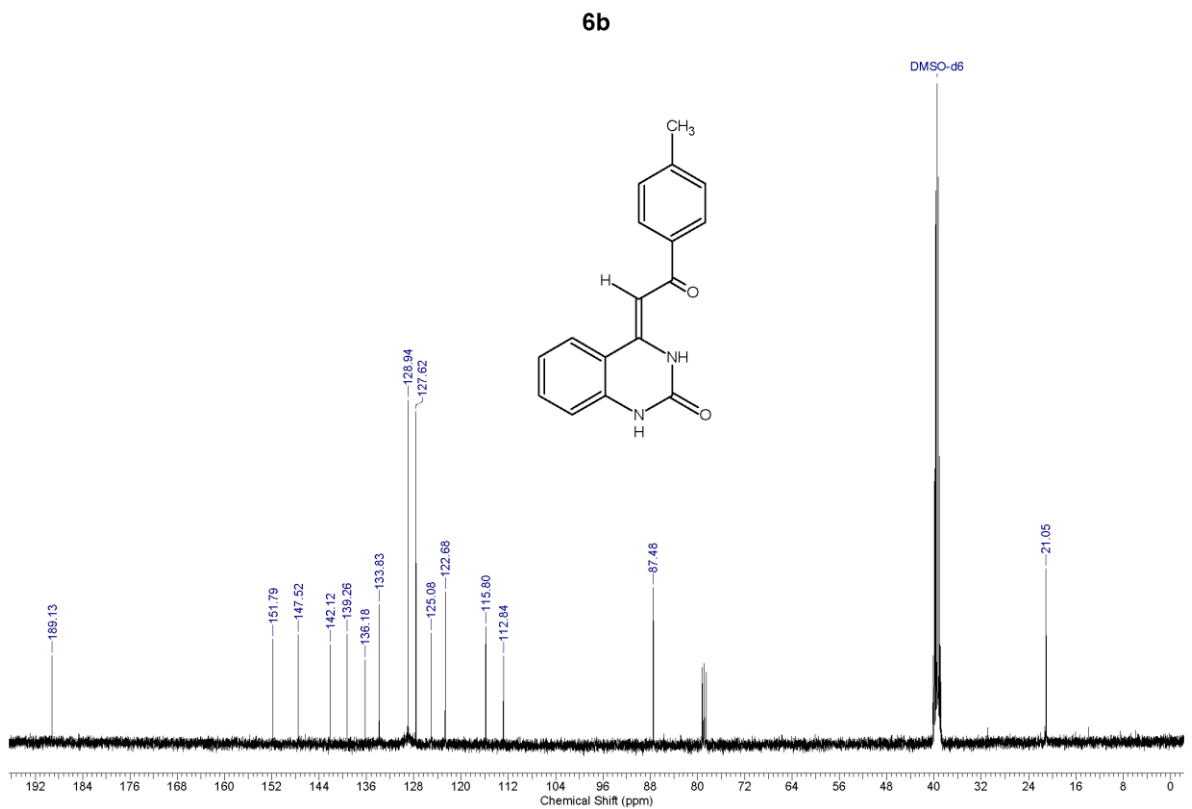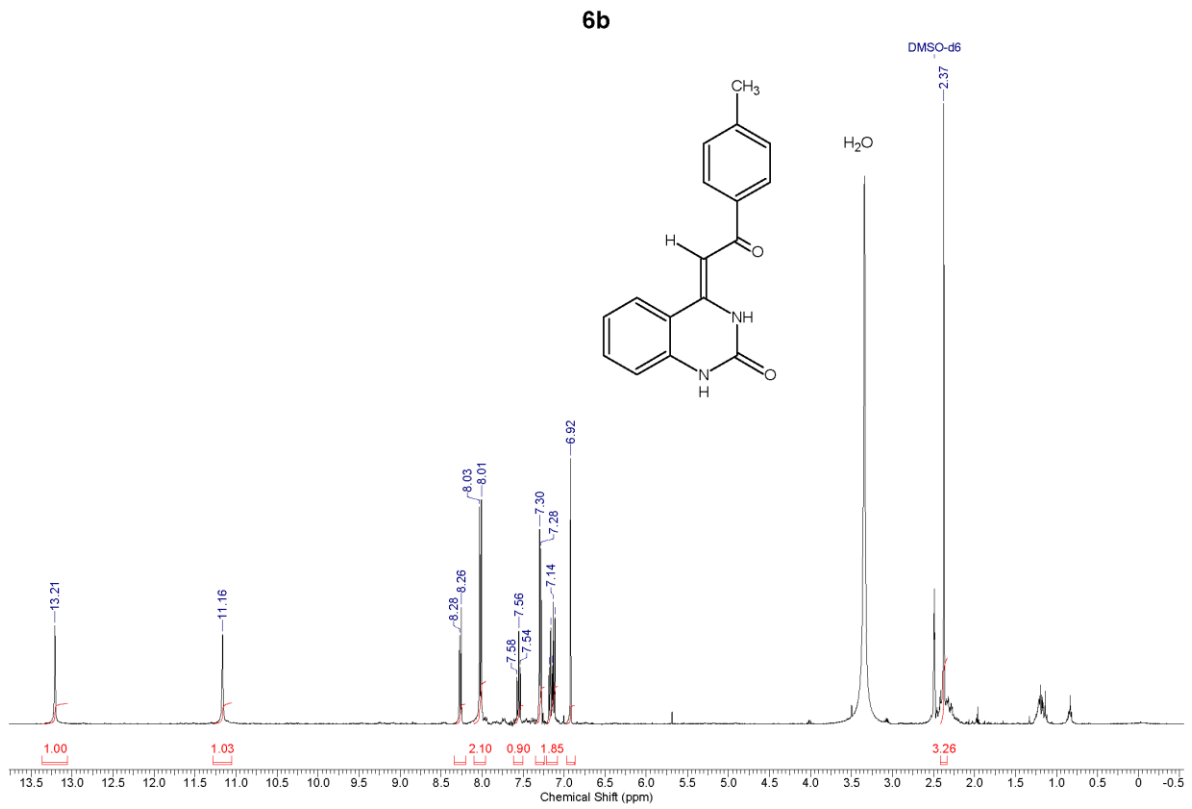

7aa - DMSO

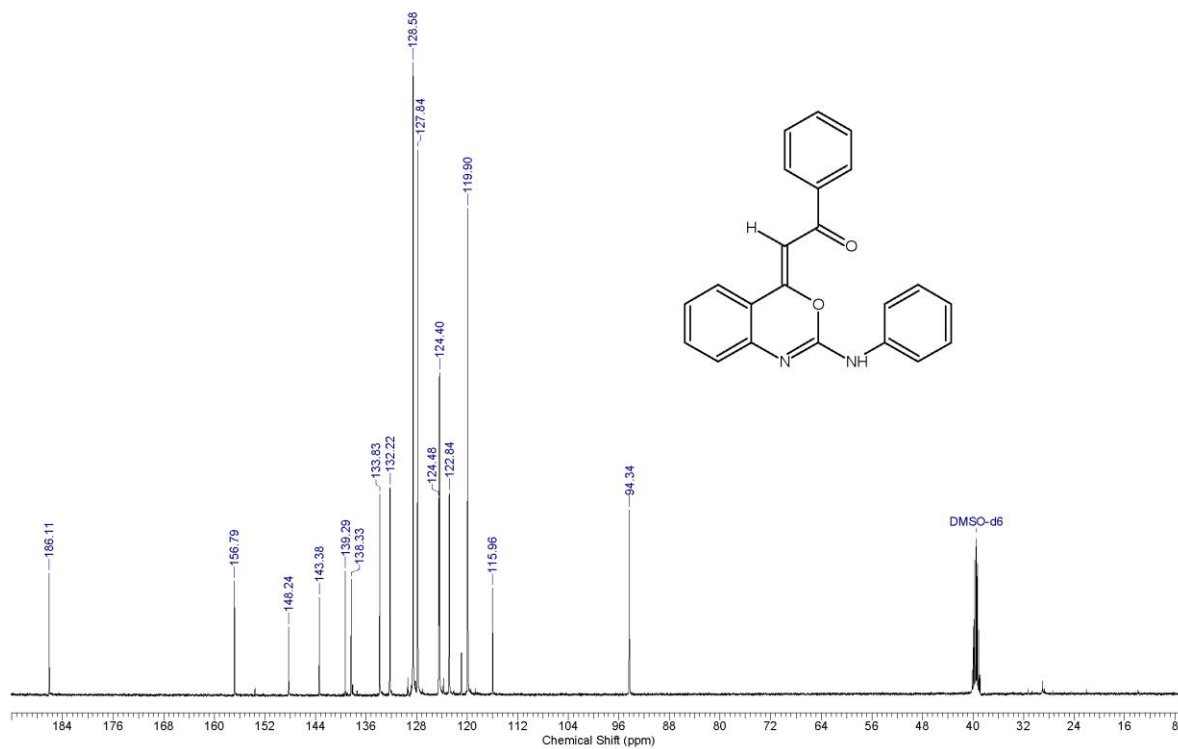

7aa - DMSO

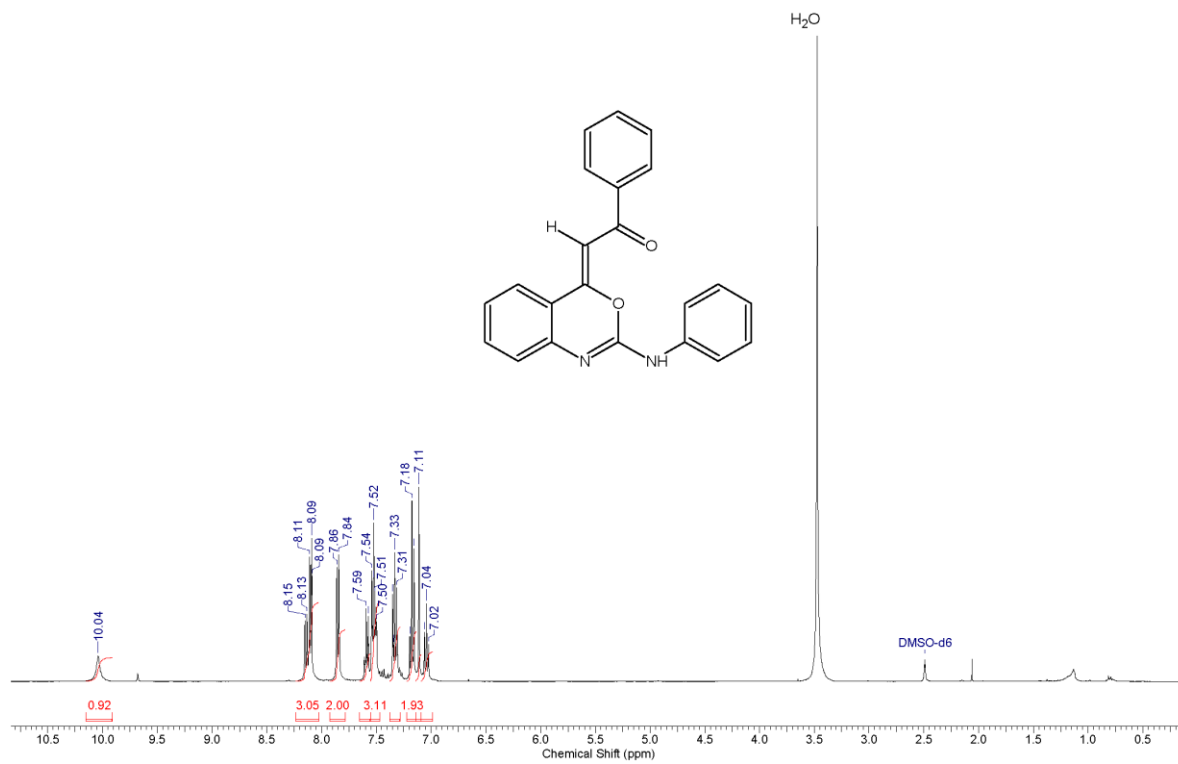

7a - Acetone-d6

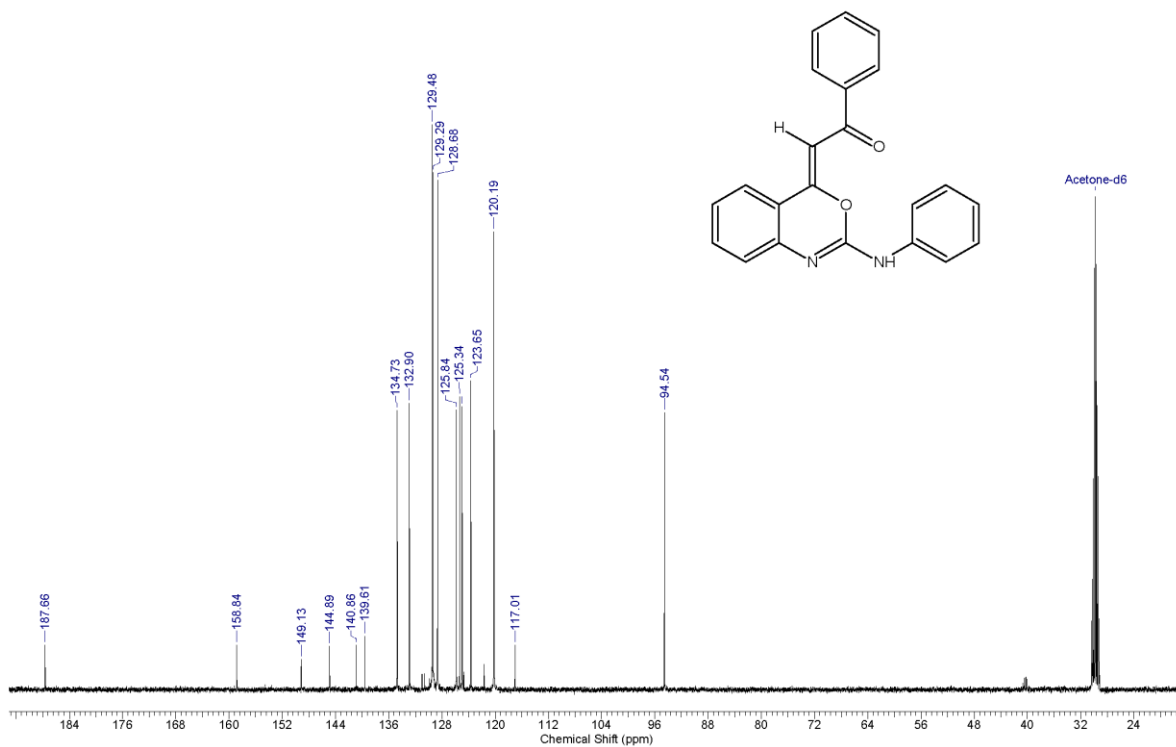

7a - Acetone-d6

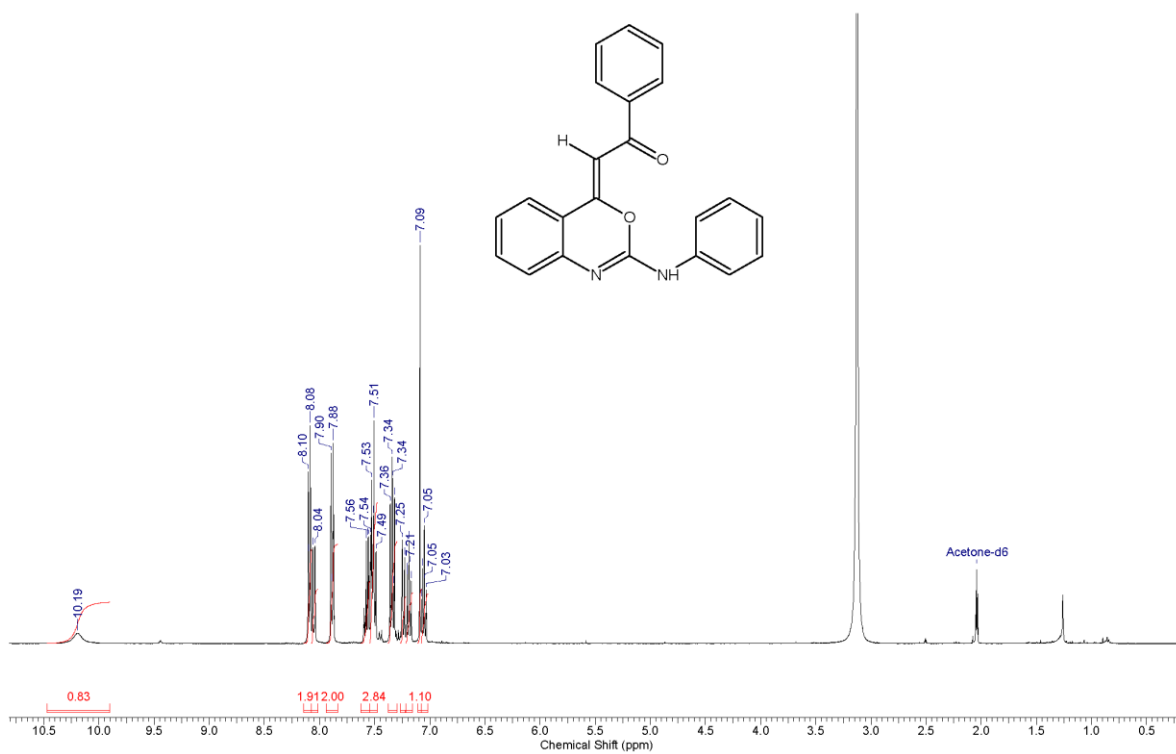

7da

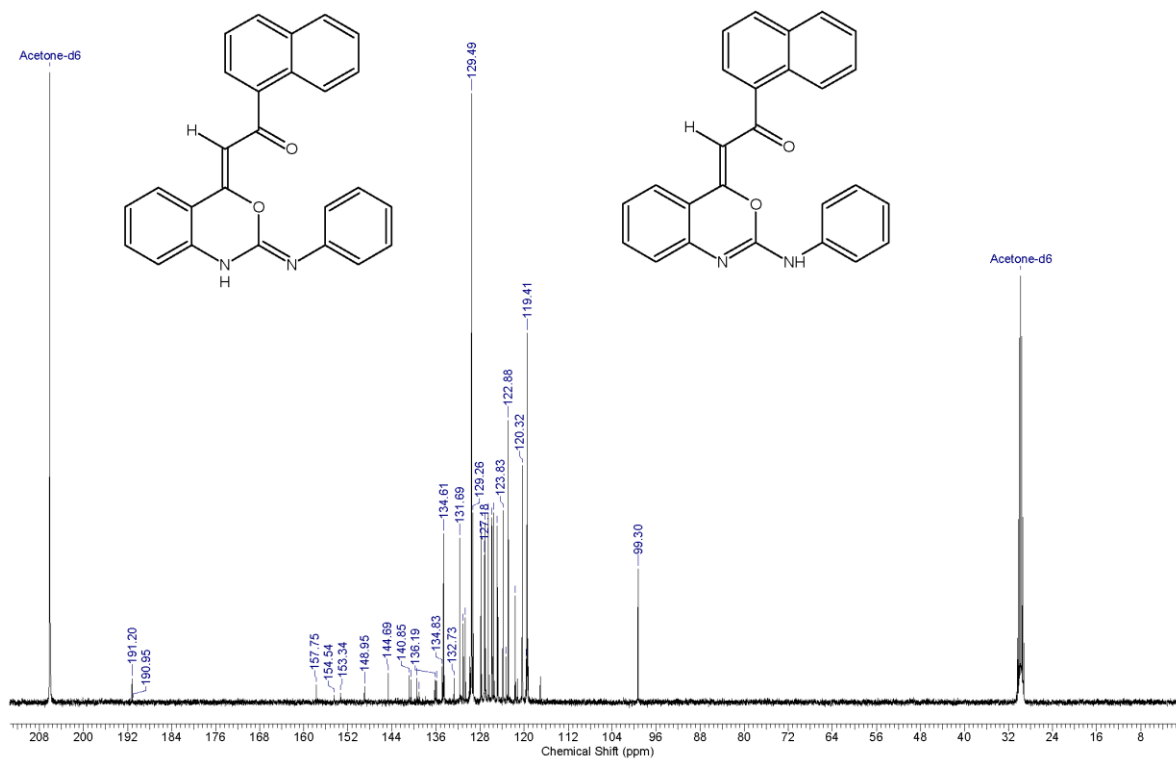

7da

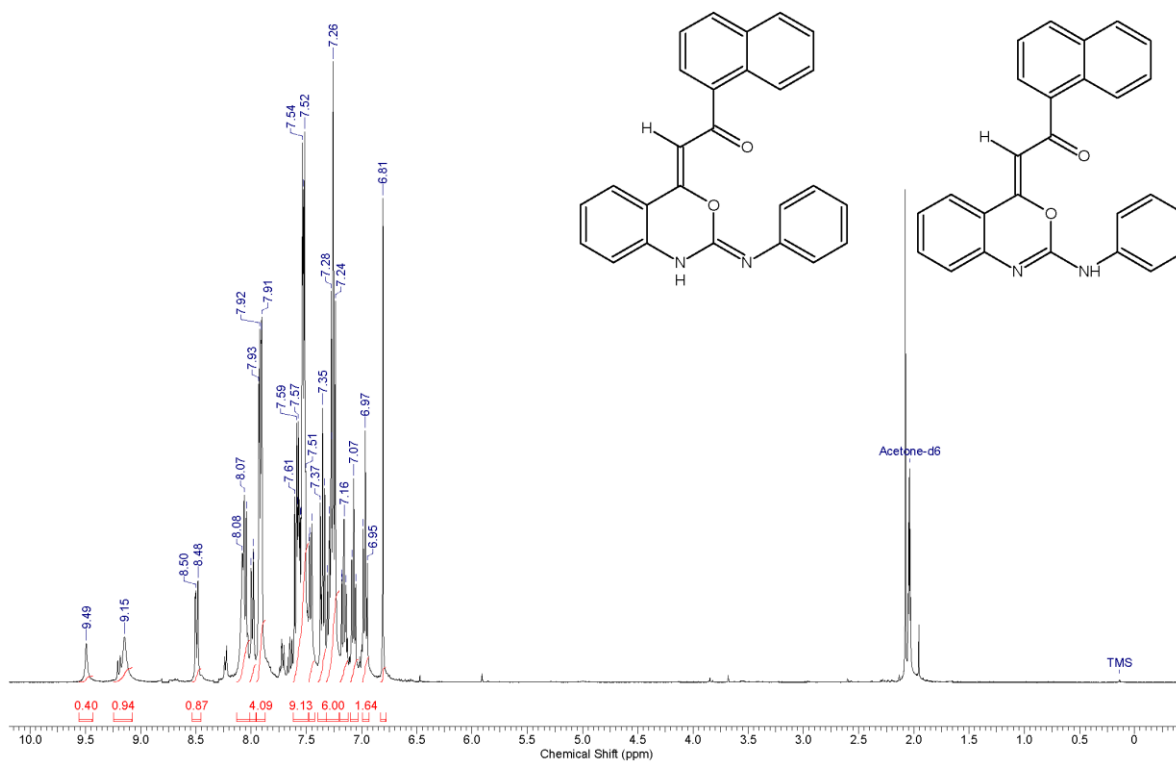

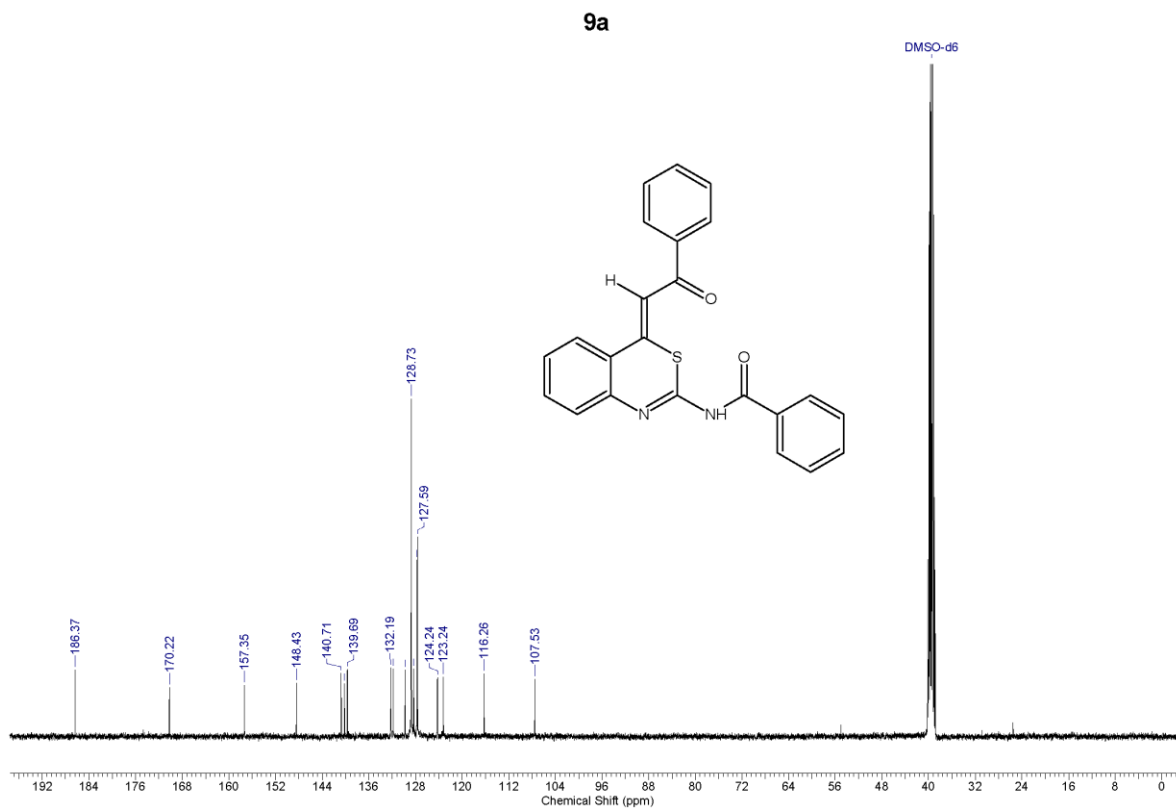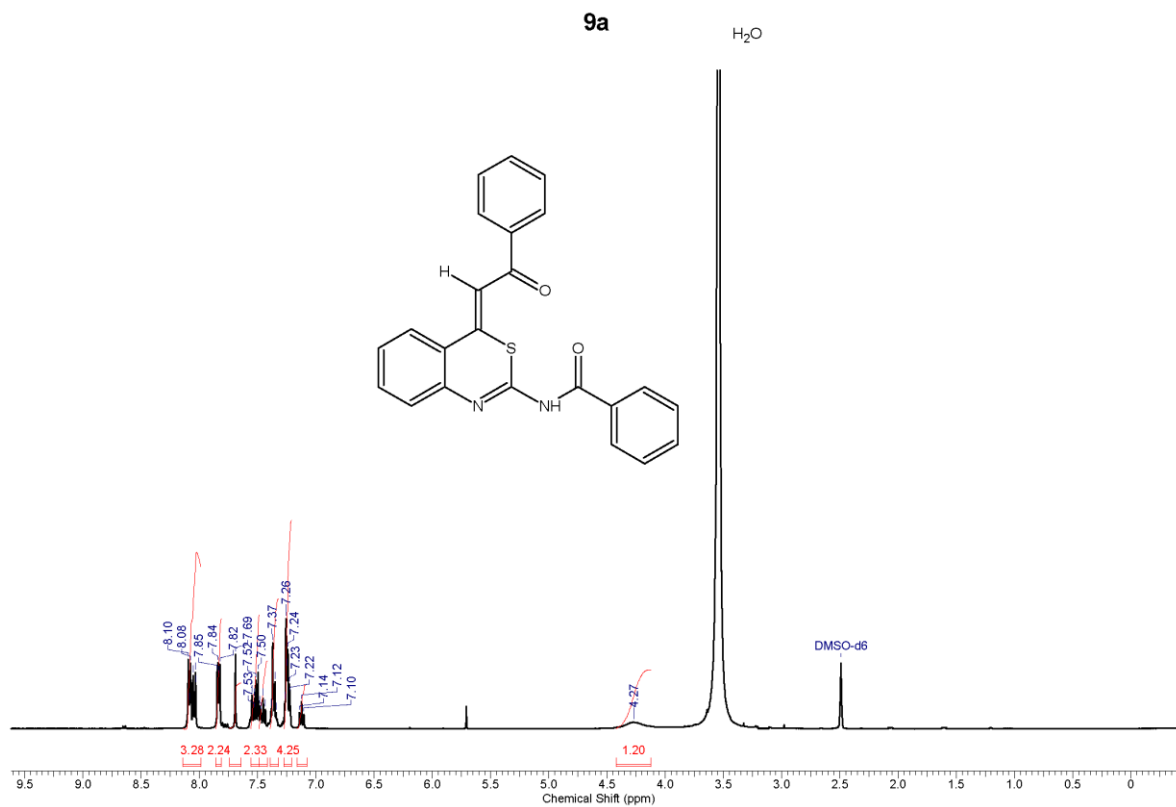

9h

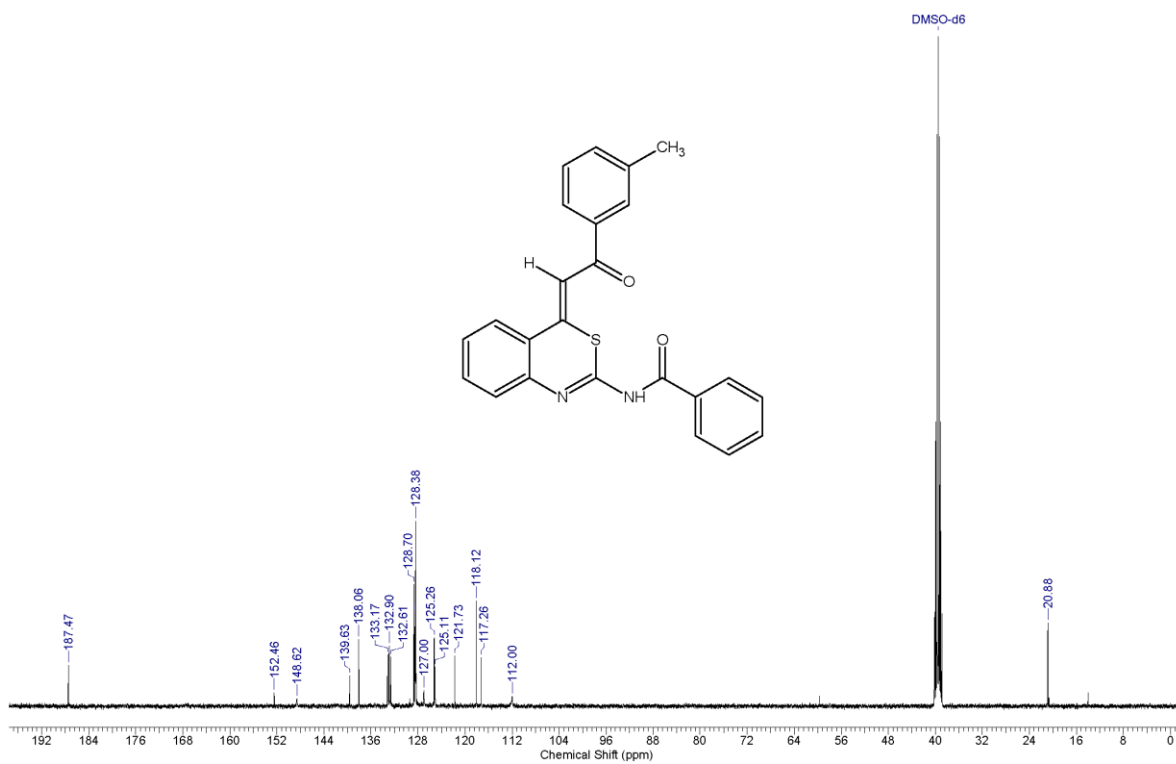

9h

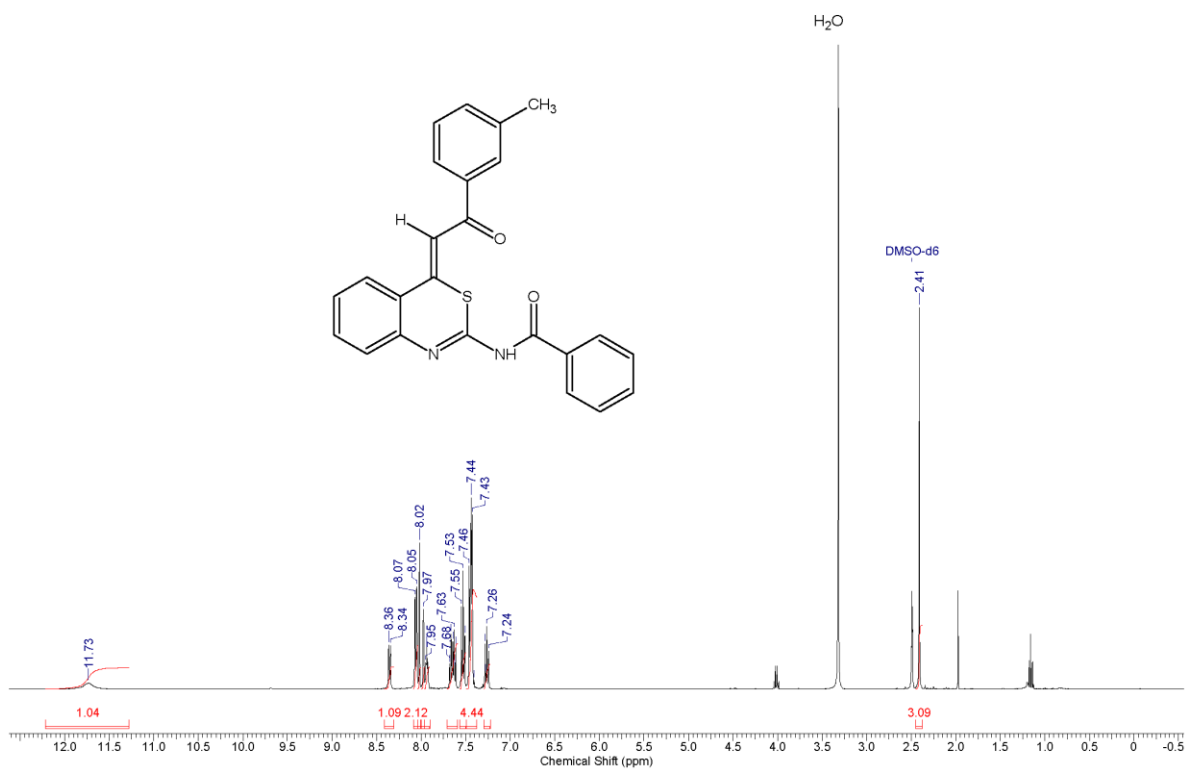

## NMR - Structural characterization in solution:

In order to better understand the structure of **5aa**, **5ba**, **6b**, **7aa** and **9a**, as model compounds, they were analysed by NMR spectroscopy ( $^1\text{H}$ ,  $^{13}\text{C}$ , H–H Cosy, H–H Noesy, H–C HSQC and H–C HMBC).

### (Z)-4-(2-oxo-2-phenylethylidene)-3-phenyl-3,4-dihydroquinazolin-2(1H)-one (**5aa**)

Key NOE interactions to establish the absolute stereochemistry for **5aa** are those of the proton H(7) with proton of the NH(1) (for structure numbering see Figure S06) of the dihydroquinazolin-2(1H)-one and those of the H(18a) of the ethylidene. Analysis of Noesy spectrum showed proximity between the ethylidene proton H(18a) and the proton H(10) of the dihydroquinazolin-2(1H)-one (Figure S07A), the proximity of the proton H(7) with the proton NH(1) of the dihydroquinazolin-2(1H)-one (Figure S07B) and also the proximity of the ethylidene proton H(18a) with the protons H(22,26) of the 2-phenil (Figure S07A).

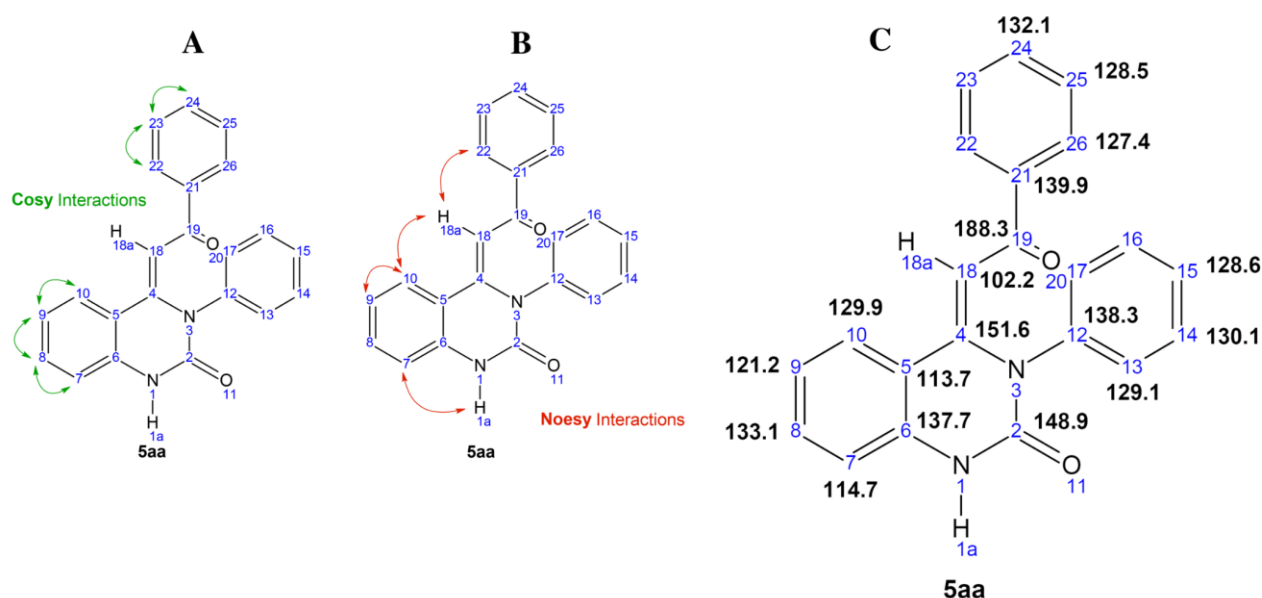

**Figure S06.** A) Relevant Cosy interactions; B) Relevant Noesy interactions C)  $^{13}\text{C}$  assignment

Analysis of Cosy spectrum allowed to establish the correct proton assignment for proton resonances of H(8) and H(9) and H(22,26), H(23,25) and H(24) as shown in Figure S08.

Analysis of HSQC spectrum provides correlations between carbons and the attached proton for all protonated carbons as shown in Figure S09.

In order to completely assign the  $^{13}\text{C}$ -NMR resonances, HMBC spectra, optimized for 5 and 8Hz long range coupling constant, were acquired (Figure S10).

Resonances for C(12) and C(21) were respectively 138.3 and 139.9 and were assigned considering that proton H(18a) correlated with 139.9 and 137.7 ppm for HMBC spectrum acquired for 5Hz long range coupling constant and that the aromatic protons C(14,16) correlate with the quaternary carbon at 138.3 ppm. Finally phenyl protons H(22,26) correlated with C(24) and C(19) confirming the assignment.

As shown in the Figure S10 the proton H(10) correlated with C(8) and with the quaternary carbons at 151.6 and 133.7 ppm, the proton H(9) correlated with C(7) and the quaternary carbon at 113.7 ppm, and the proton H(7) correlated with C(9) and the quaternary carbon at 113.7 ppm; the correlations just indicated were for  $^3J_{\text{CH}}$  couplings, so we assigned at C(5) 113.7 ppm as resonance. In order to assign the other two resonances, we considered that proton H(18a) correlated with the quaternary carbon at 113.7 and 151.6 ppm, so we assigned at C(4), and C(6) the resonances 151.6, and 133.7 ppm respectively.





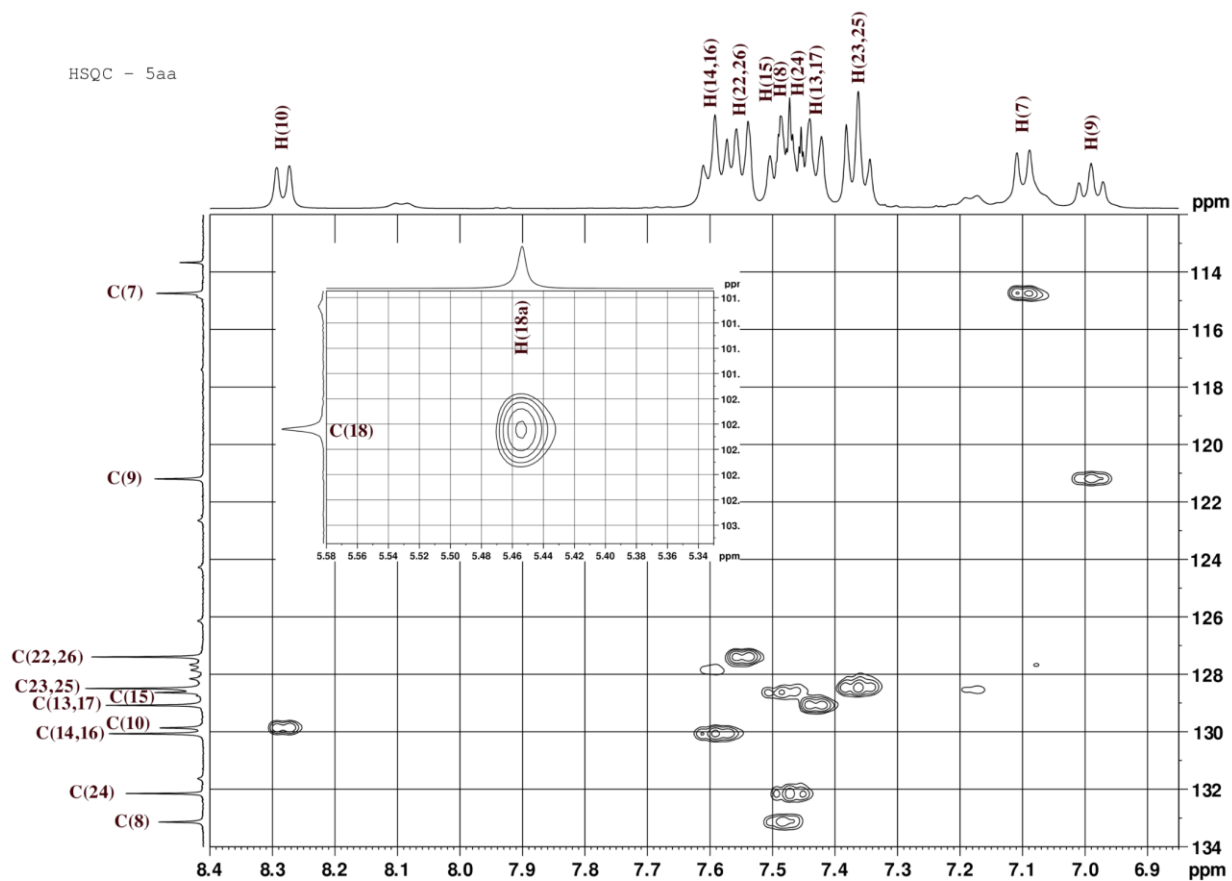

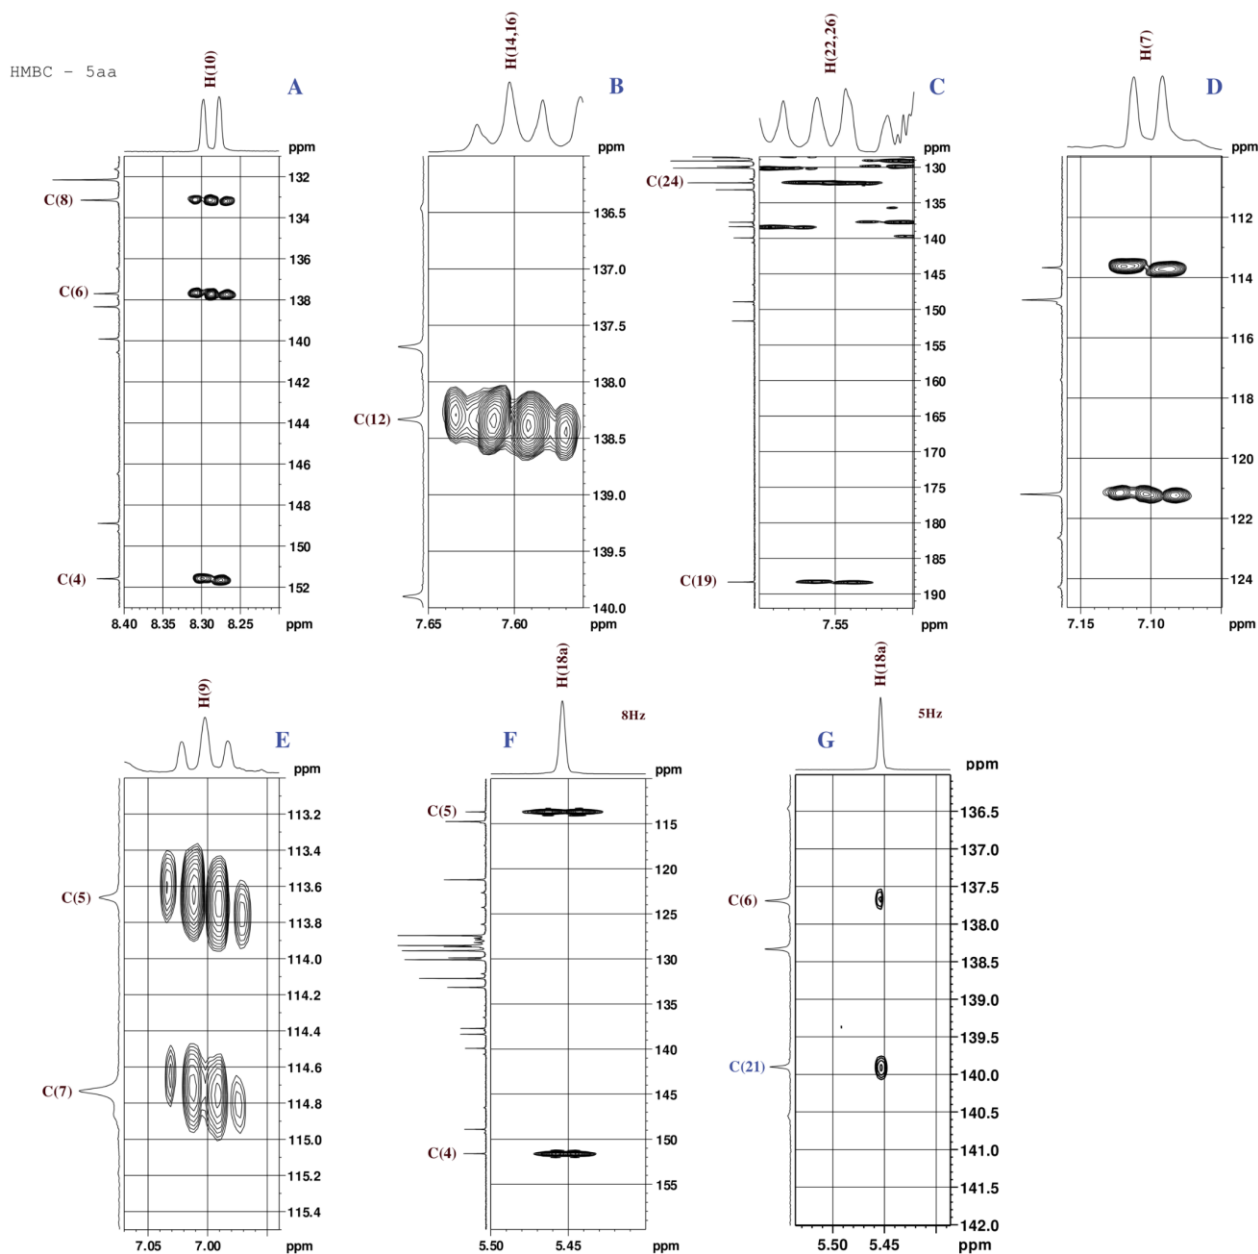

**Figure S10.** HMBC. Correlations between protons and carbons through long range coupling constant for **5aa**.

### **(Z)-4-[2-(4-methylphenyl)-2-oxoethylidene]-3-phenyl-3,4-dihydroquinazolin-2(1H)-one (5ba)**

The **5ba** sample used for all the NMR spectra was the one deriving from the X-ray crystallographic analysis.

Key NOE interactions to establish the absolute stereochemistry for **5ba** are those of the proton H(7) with the proton of the NH(1) (for structure numbering see Figure S11) of the dihydroquinazolin-2(1H)-one and those of the proton H(18a) of the ethylidene. In fact, from the noesy interaction of the proton H(7) with the proton NH(1) (Figure S12B), we assigned the correct resonance at the proton H(7). The Noesy spectrum showed proximity between the ethylidene proton H(18a) and the proton H(10) of the dihydroquinazolin-2(1H)-one (Figure S12A), and the noesy interactions between the proton H(18a) and the protons H(22,26). Moreover, from Noesy interactions between the Me(27) and the protons H(23,25) we distinguished resonances for 4-methylphenyl from that for the phenyl (Figure S12C). Noesy spectrum also showed a weak interaction between the Me(27) and

the protons H(22,26), Figure S11C, and noe interactions between the protons H(9) and H10, the protons H(7) and H(8) and the protons H(23,25) and H(22,26).

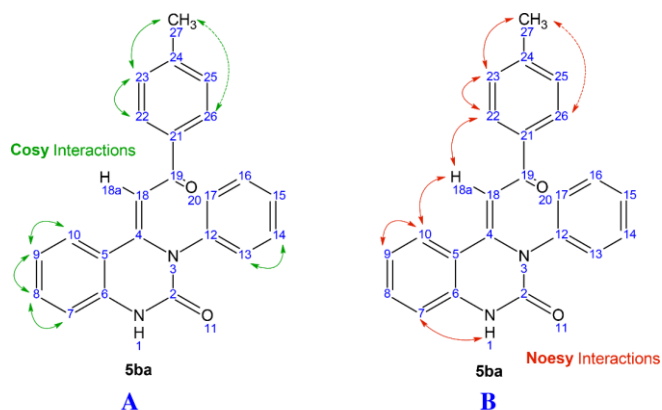

**Figure S11.** A) Relevant Cosy interactions; B) Relevant Noesy interactions.

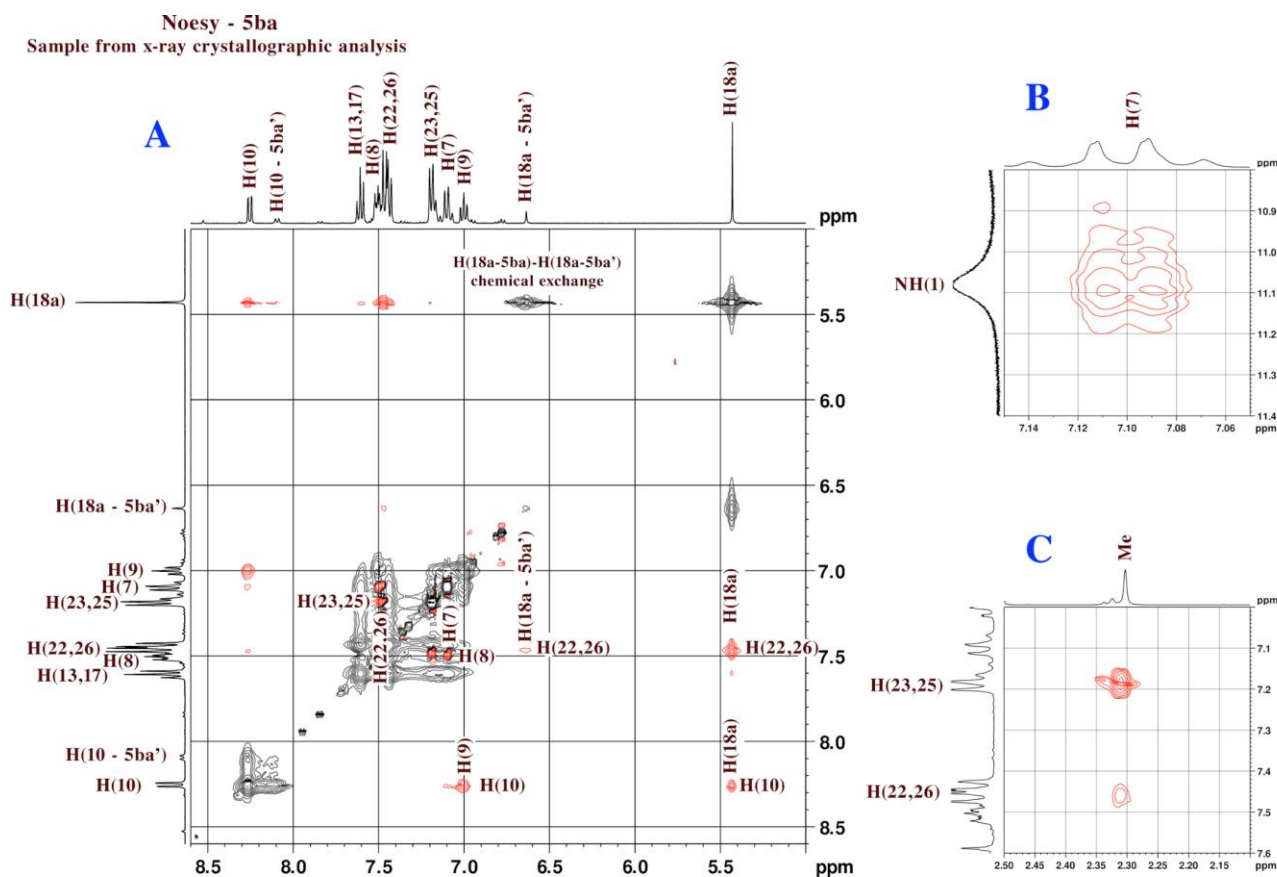

**Figure S12.** Key NOESY correlations for **5ba**.

Analysis of Cosy spectrum allowed to confirm, among the others, the correct proton assignment for the resonances of H(10), H(22,26) and H(23,25), as shown in Figure S13, confirming that in solution we have the **Z** isomer.

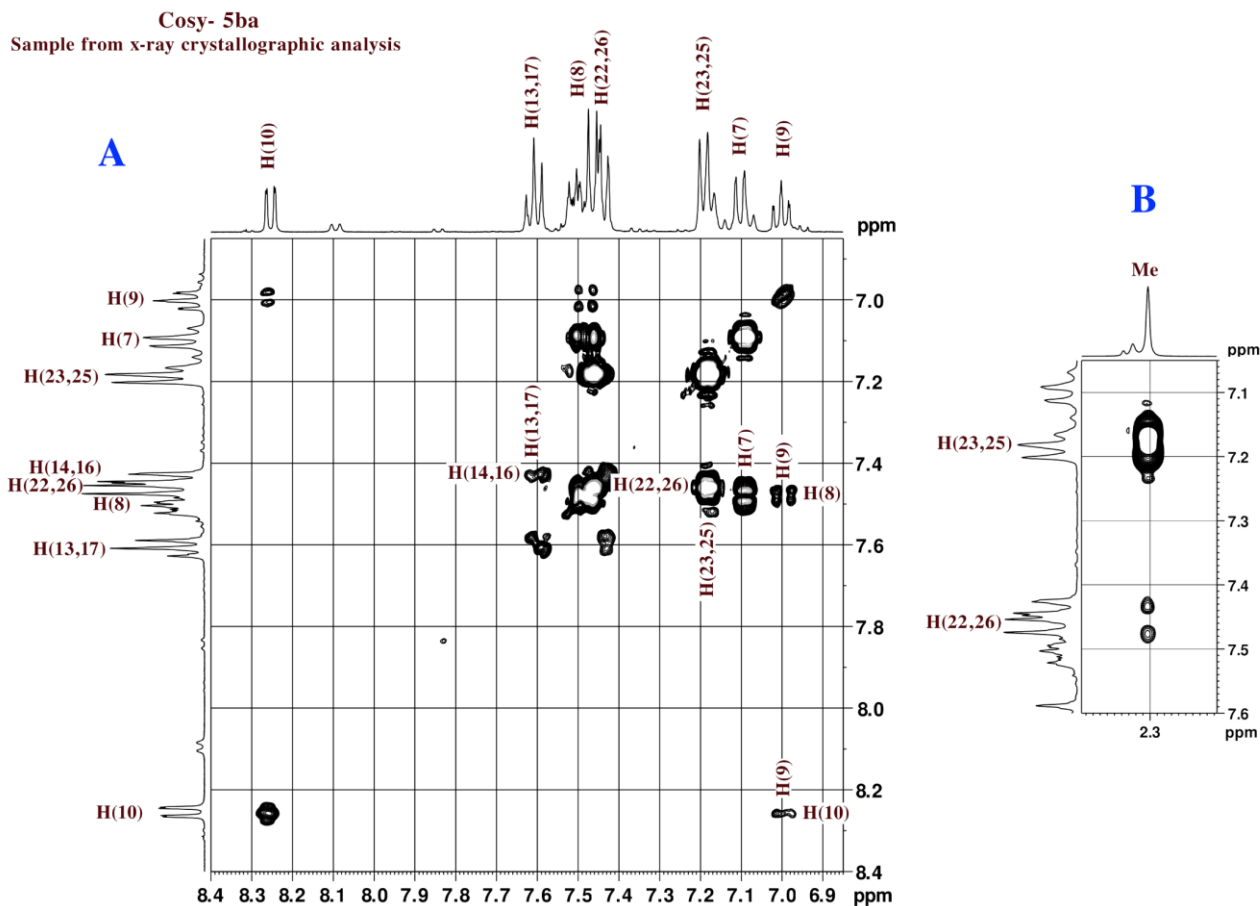

**Figure S13.** COSY correlations. A) Relevant coupling interactions for **5ba**. B) Cosy interactions for the methyl group.

**(4Z)-4-[2-(4-methylphenyl)-2-oxoethylidene]-3,4-dihydroquinazolin-2(1H)-one (**6b**).**

In order to assign the correct stereochemistry to the derivative **6b** it is necessary to assign the correct resonance to the two NH and to the proton H(10) of the 3,4-dihydroquinazolin-2(1H)-one (for structure numbering see Figure S14). In fact, key NOE interactions are those of the proton H(12a) of the 2-oxoethylidene. The Noesy analysis showed the resonance position of the protons H(1a) (see Figure S15), in fact, there was noe interaction between NH(1a) and H(7), while no interaction of NH(3a) with H(7), was seen, nor chemical exchange between NH(1a) and NH(3a), Figure S15. From the analysis of the Noesy spectrum, it was evident that the proton H(12a) interacted with the proton H(10), indicating that the geometry of the double bond was **Z**, Figure S16A. Moreover, the resonance of NH(3a) was confirmed by the noesy interaction with the protons H(10) and H(16,20) (see Figure S16B). The Noesy spectrum showed also some small interactions between NH(3a) and the protons H(12a) and H(16,20), Figure S16B, and between the methyl group and H(16,20), Figure S16B.

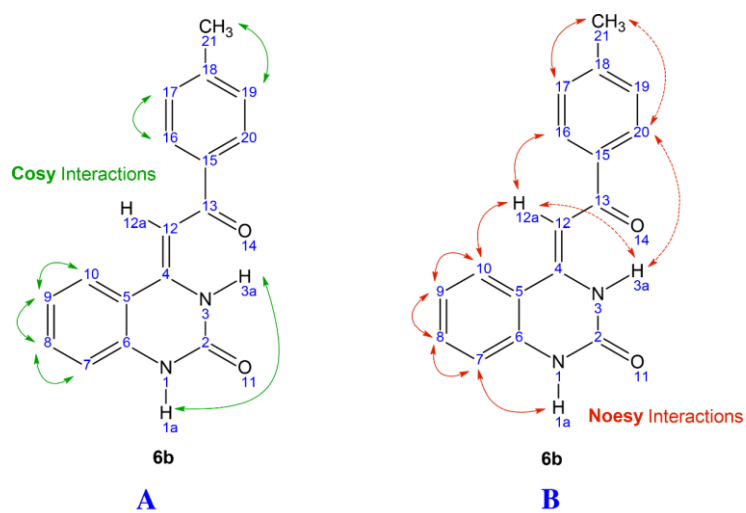

**Figure S14.** A) Relevant Cosy interactions; B) Relevant Noesy interactions for **6b**.

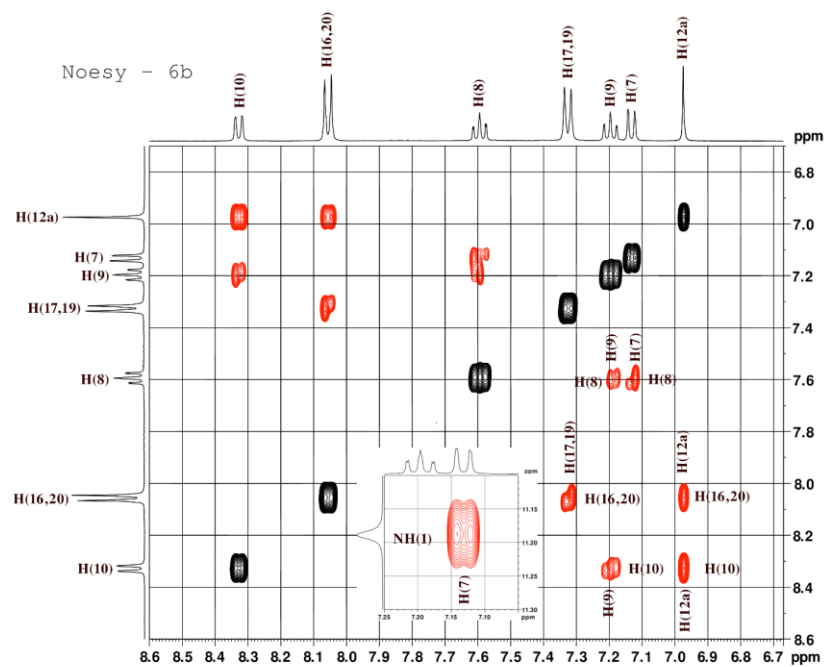

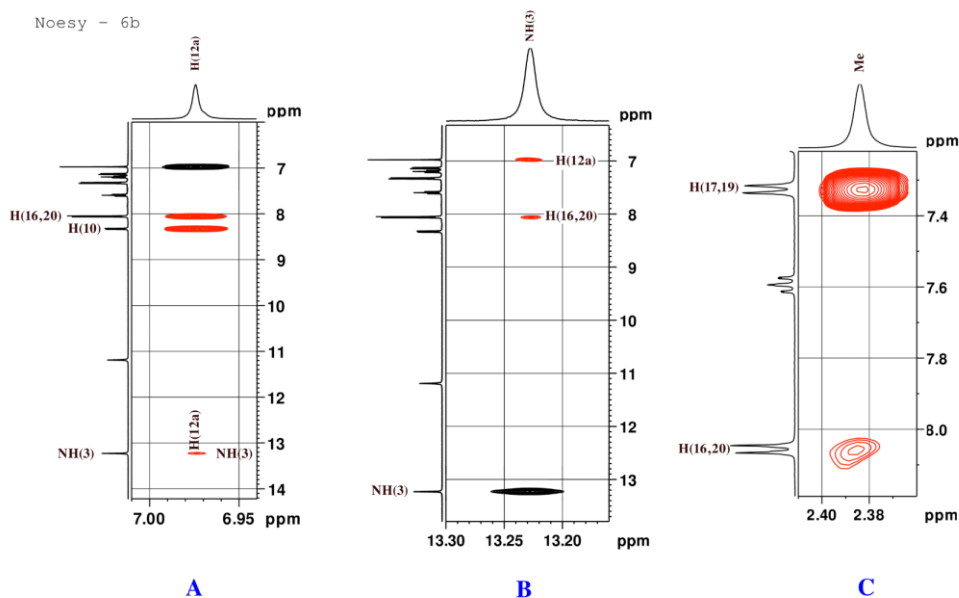

**Figure S16.** Key NOESY correlations for **6b** A) Noesy for H(12a); B) Noesy for NH(3a); C) Noesy for Me

Analysis of Cosy spectrum allowed to confirm the correct proton assignment (Figure S17).

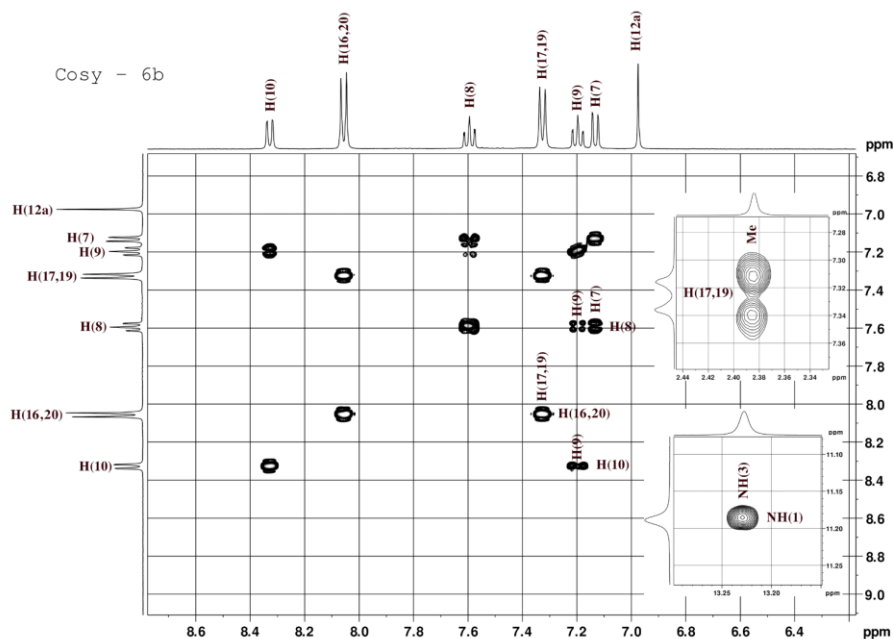

**Figure S17.** COSY correlations for **6b**.

**(2Z)-2-(2-anilino-4H-3,1-benzoxazin-4-ylidene)-1-phenylethanone (7aa).**

Spectra for **7aa** acquired in DMSO-d<sub>6</sub> at 303 K (Figure S18) showed some overlaps for <sup>13</sup>C-NMR, so we decided to acquire the spectra also using acetone-d<sub>6</sub> as a solvent at 313 K. Changing from DMSO to Acetone, relative shifts were small, but sufficient to resolve some overlaps on 4H-3,1-benzoxazin-4-ylidene (Figure S18).

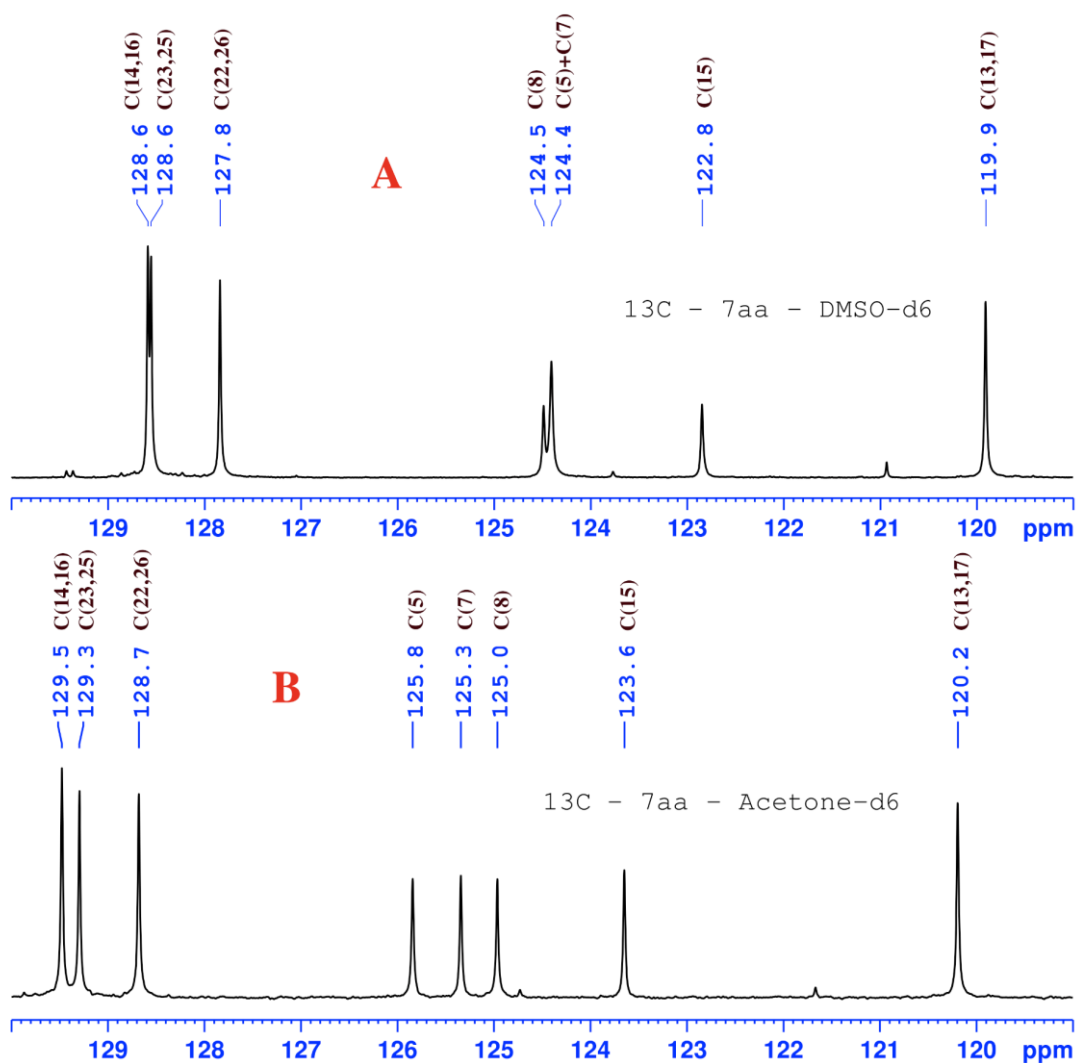

**Figure S18.**  $^{13}\text{C}$  NMR. A) Expansion of  $^{13}\text{C}$  NMR for **7aa** in DMSO- $d_6$  at 303 K B) Expansion of  $^{13}\text{C}$  NMR for **7aa** in acetone- $d_6$  at 313 K.

Key NOE interactions to establish the absolute stereochemistry for **7aa**, are those of the protons H(13,17) with and NH(11) (for structure numbering see Figure S19) of the anilino, in fact those allow to distinguish the resonances of the anilino from that of the phenylethanone, and those of H(18a). The Noesy analysis showed the resonance position of the protons H(13,17) (see Figure S20A) and consequently the proximity between the proton H(18a) and the proton H(8) of 4H-3,1-benzoxazin-4-ylidene, as well as with the protons (22,26) of phenylethanone (Figure S20B), showing that in solution we have the **Z** isomer. The Noesy has also shown the interactions between all protons of the anilino, all protons of the 4H-3,1-benzoxazin-4-ylidene and noesy interaction between the protons H(22,26) and H(23,25) of the phenylethanone (Figure 19A).



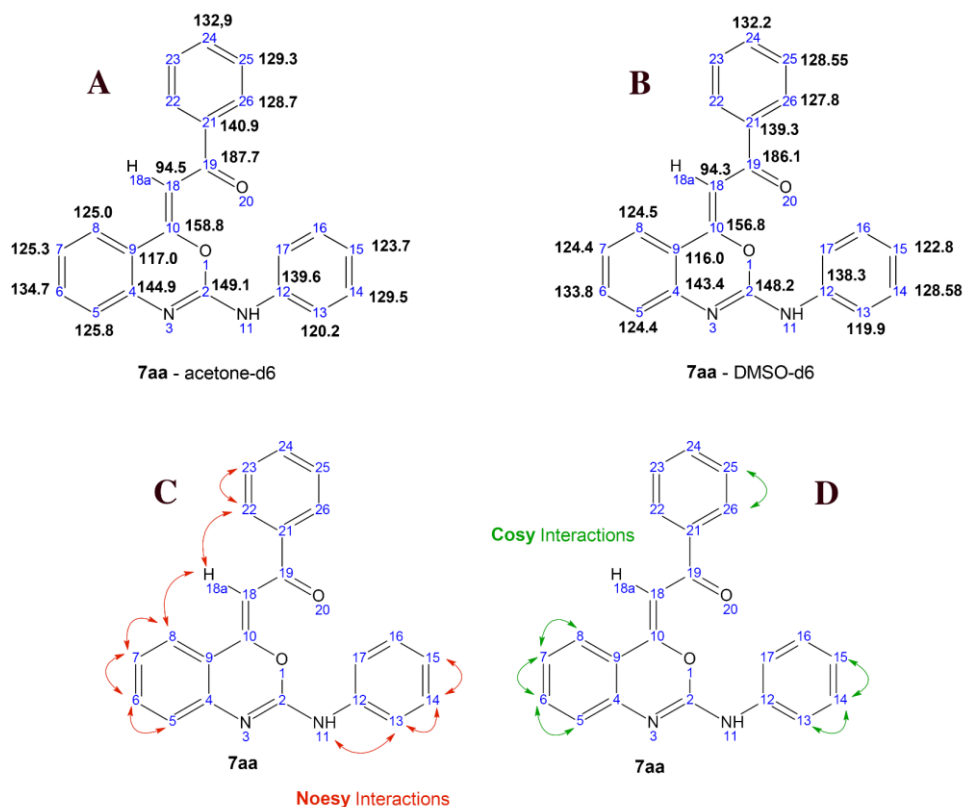

**Figure S19.** A)  $^{13}\text{C}$  assignment in acetone- $d_6$ ; B)  $^{13}\text{C}$  assignment in DMSO- $d_6$ ; C) Relevant Noesy interactions both in Acetone- $d_6$  and DMSO- $d_6$ ; D) Relevant Cosy interactions both in Acetone- $d_6$  and DMSO- $d_6$ .

The analysis of the Cosy spectrum allowed to confirm the correct assignment of the protons made with the Noesy analysis, as shown in Figure S21.

Analysis of HSQC spectrum provides correlations between carbons and the attached proton for all protonated carbons as shown in Figure S22.

In order to completely assign the  $^{13}\text{C}$ -NMR resonances, the HMBC spectra, optimized for 8Hz long rang coupling constant, was acquired (Figure S23).

As shown in the Figure S23A the proton H(15) correlated with the quaternary carbon at 139.6 ppm, so we assigned that resonance at C(12). The quaternary carbon at 149.1 ppm correlated only with the proton H(18a) so we assigned that resonance at C(2), Figure S23B. The quaternary carbon at 140.9 ppm correlated with the protons H(24) and H(23,25) so we assigned that resonance at C(21) Figure S23C. Because the quaternary carbons at 117.0 ppm and 144.9 ppm correlated both with the proton H(6) but only the quaternary carbon at 117.0 ppm correlated with the proton H(18a) we assigned at C(4) the resonance 144.9 ppm and at C(9) the resonance 117.0 ppm Figure S23D. Finally, at the carbon C(10) has been assigned the resonance of 158.8 ppm because it correlated with both the protons H(18a) and H(8), Figure S23E.

Noesy - 7aa

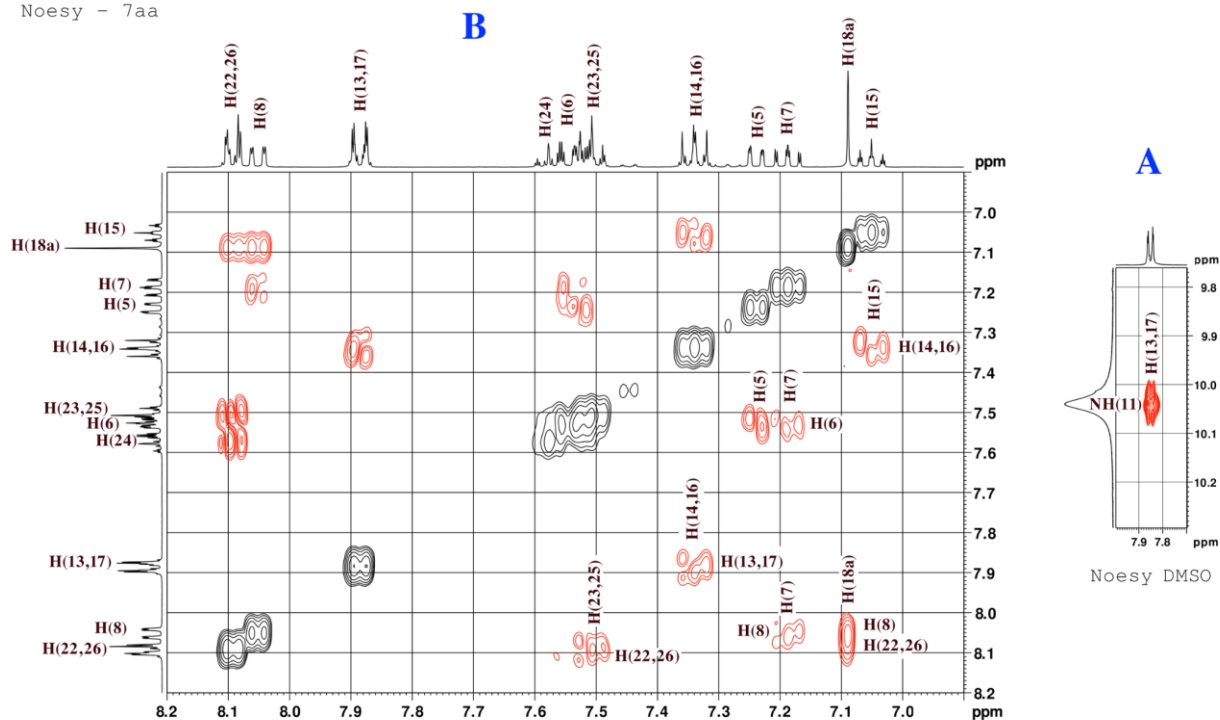

**Figure S20.** Key NOESY correlations for **7aa**. A) Relevant Noesy interactions for **7aa** in acetone-d<sub>6</sub>. B) Noesy interaction of the protons H(13,17) with and NH(11) in DMSO-d<sub>6</sub> for **7aa**.

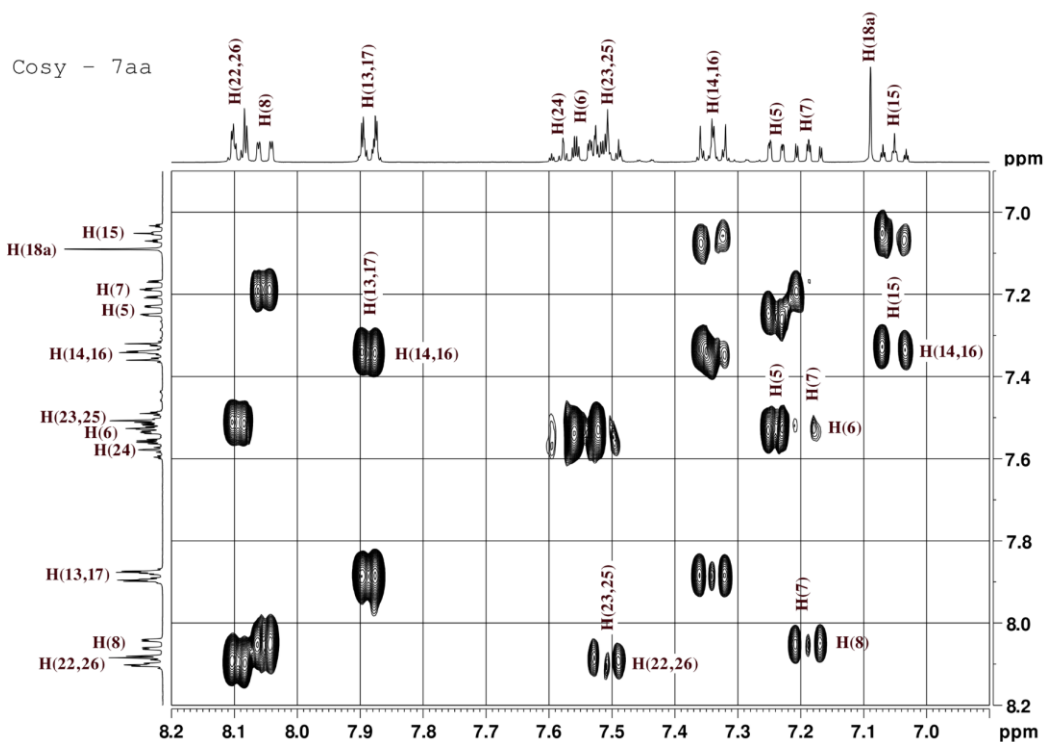

**Figure S21.** COSY correlations. Relevant coupling interactions for **7aa**.

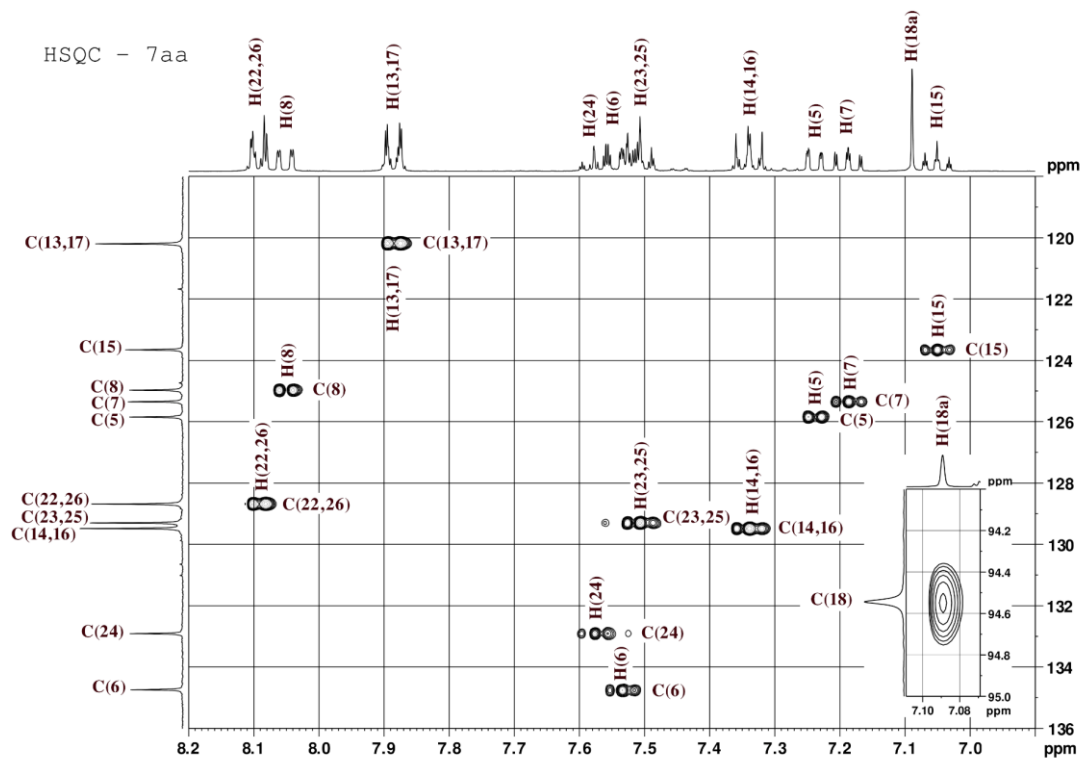

**Figure S22.** HSQC. Correlations between protons and directly attached (one bond) carbon for **7aa**.

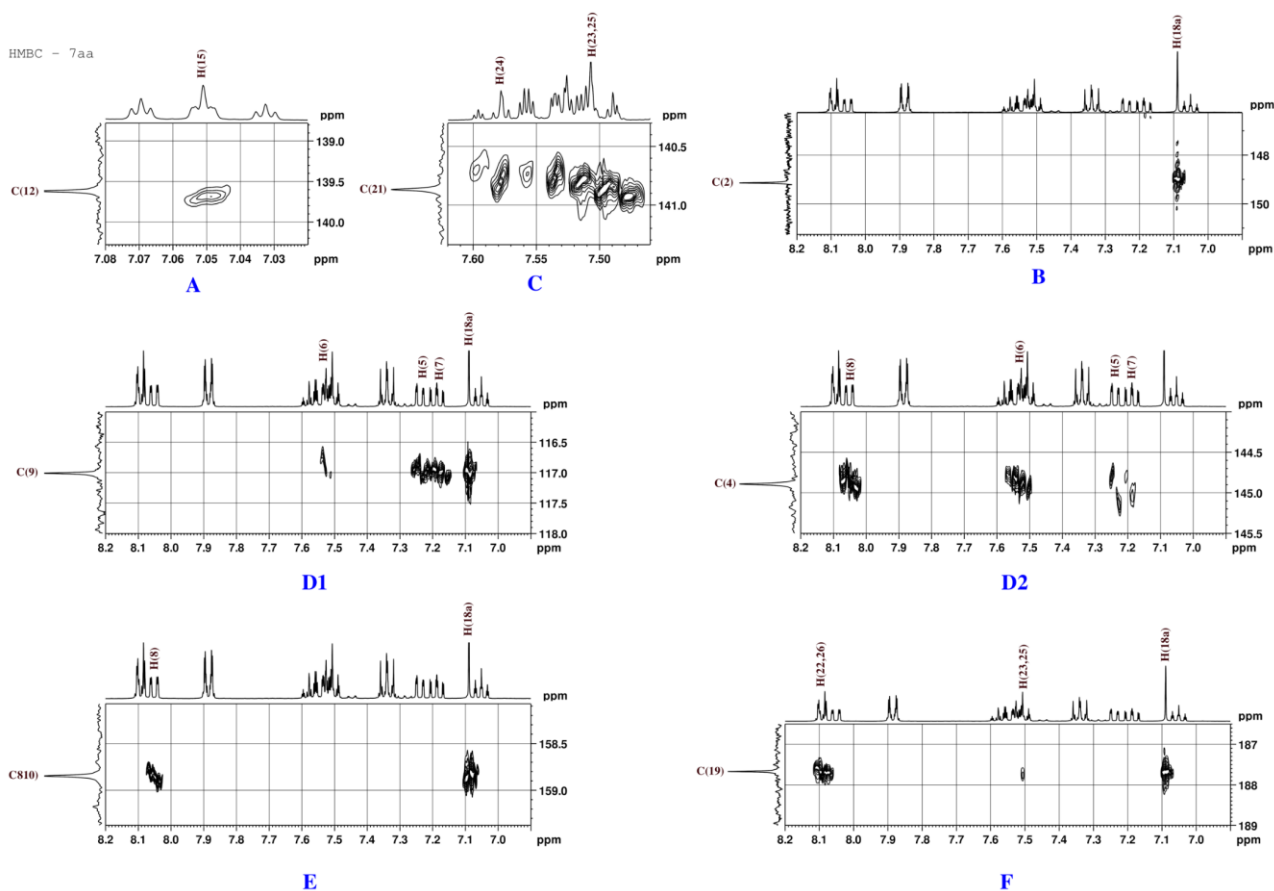

**Figure S23.** Correlations between protons and carbons through long range coupling constant for **7aa**. Complete NMR spectra assignment has been made also for **7aa** acquired in DMSO at 303, with similar considerations already

The complete NMR spectra assignment for **7aa**, acquired in DMSO-d<sub>6</sub> at 303 K, was made with similar considerations already exploited for the same compound acquired in acetone-d<sub>6</sub> at 313 K. No significant changes were recorded, and the Z geometry is also confirmed in DMSO-d<sub>6</sub>.

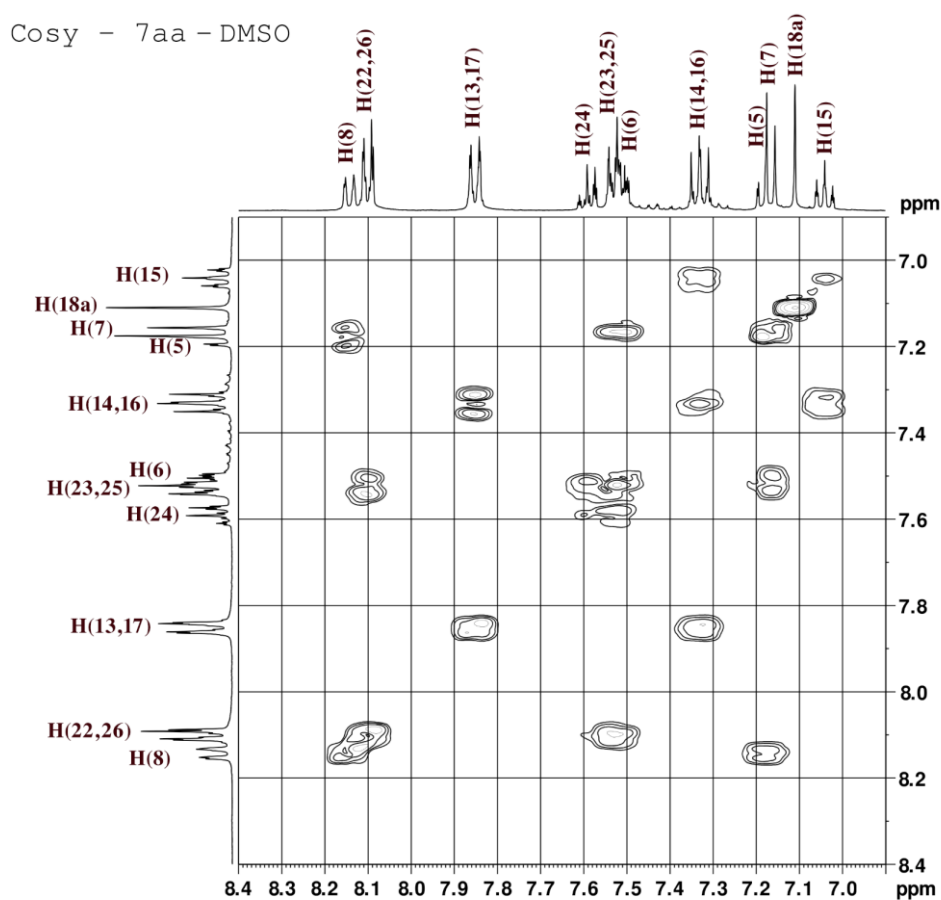

**Figure S24.** COSY correlations. Relevant coupling interactions for **7aa**.

Noesy - 7aa - DMSO

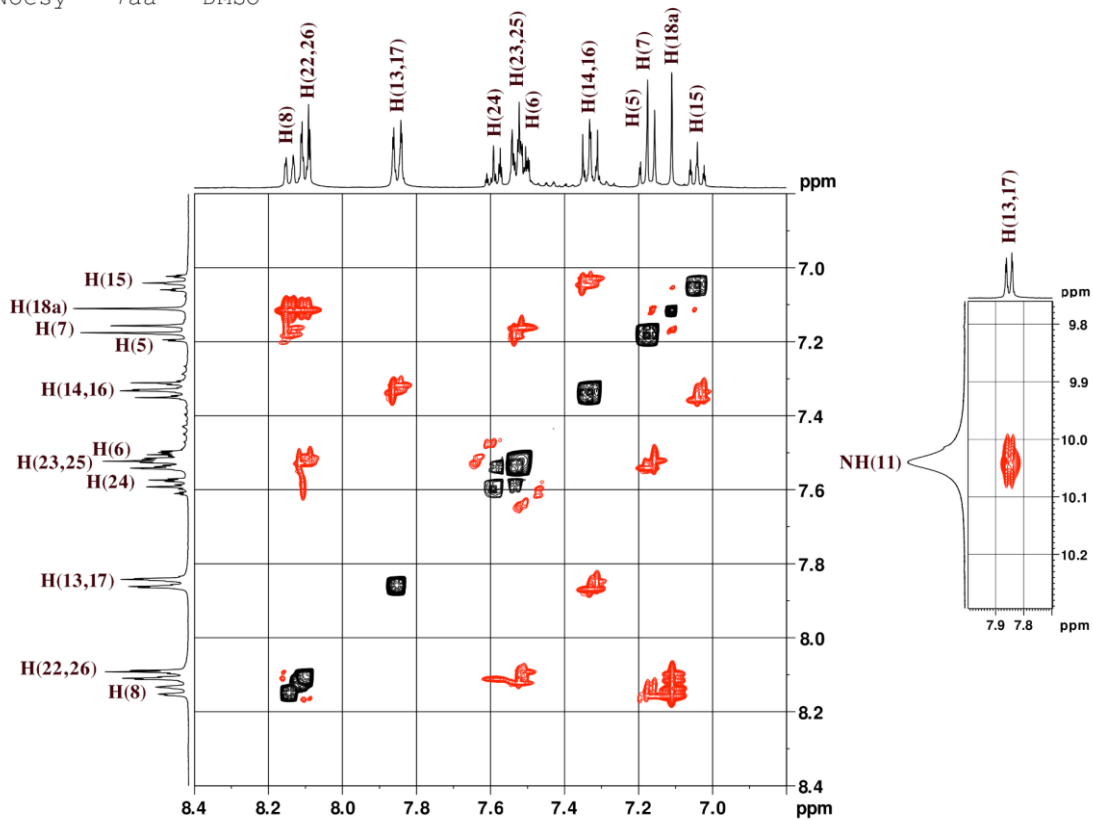

Figure S25. Key NOESY correlations for 7aa in DMSO-d<sub>6</sub>

HSQC - 7aa - DMSO

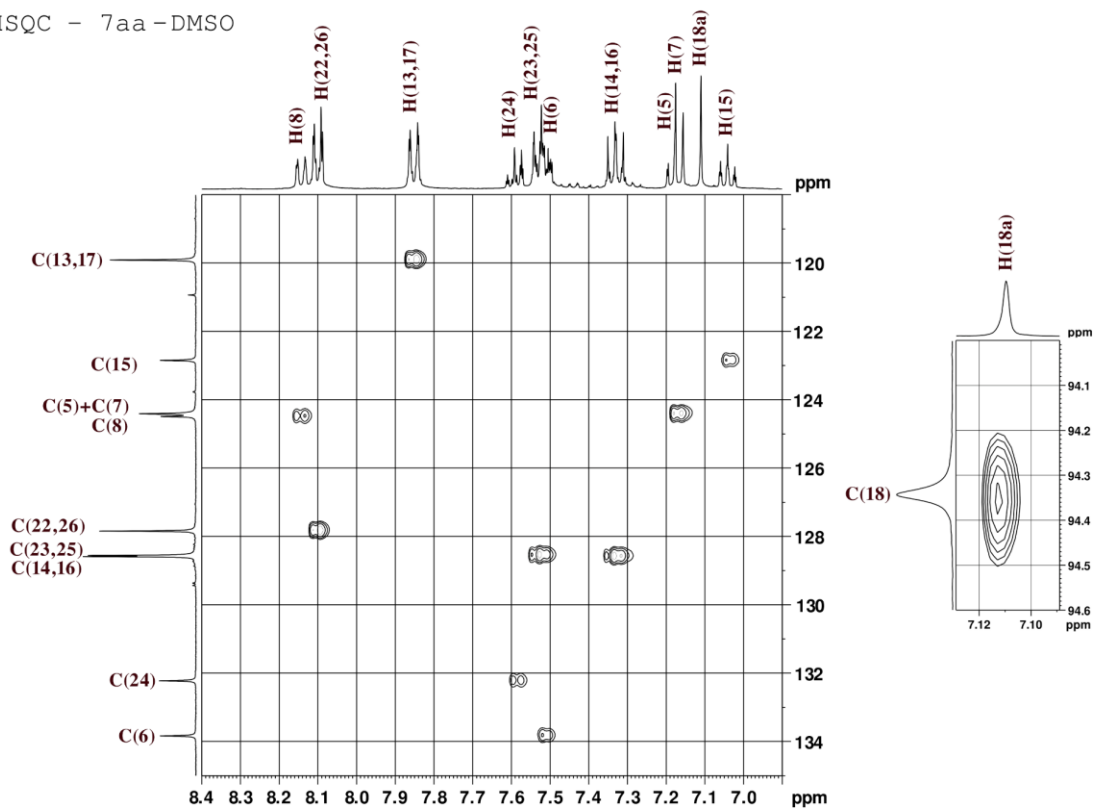

Figure S26. HSQC. Correlations between protons and directly attached (one bond) carbon for 7aa.

HMBC - 7aa - DMSO

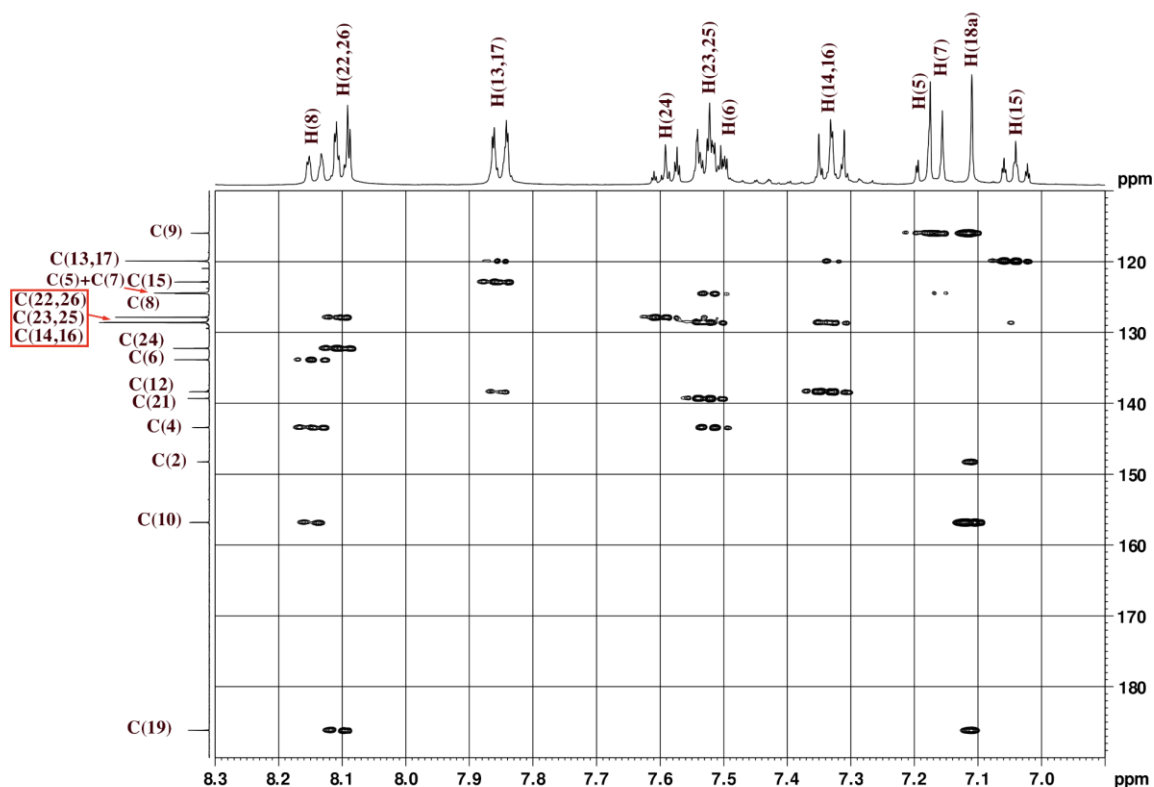

**Figure S27.** Correlations between protons and carbons through long range coupling constant for **7aa** in DMSO-d<sub>6</sub> at 303K.

### N-[(4Z)-4-(2-oxo-2-phenylethylidene)-4H-3,1-benzothiazin-2-yl]benzamide (**9a**)

The NOesy interactions shown in the spectrum for **9a** (Figure S28) indicated that in solution the isomeric structure of **9a** was the same obtained by the X-ray crystallographic analysis of **9h**.

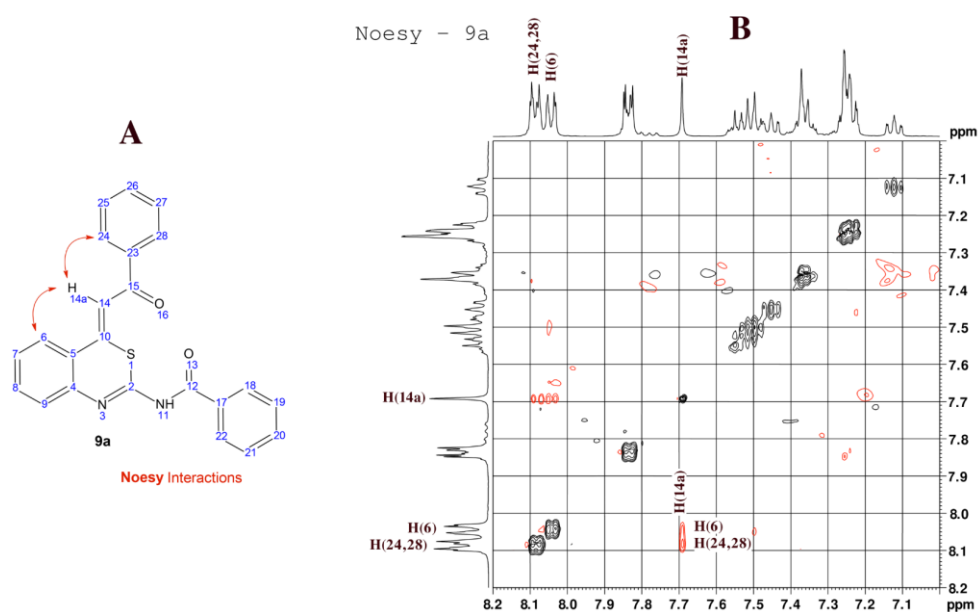

**Figure S28.** NOESY correlations for **9a**. A) Structure numbering and interactions B) NOESY spectrum for **9a**.

## Crystal packing

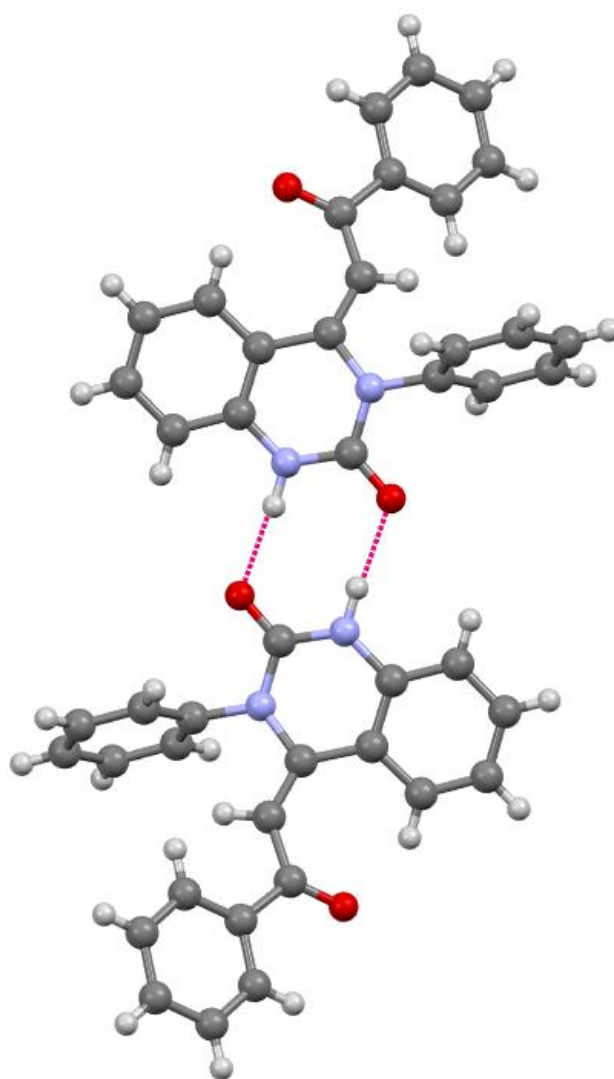

**Figure S03.** Part of the crystal structure of **5aa''**, showing the formation of a hydrogen bonding network.

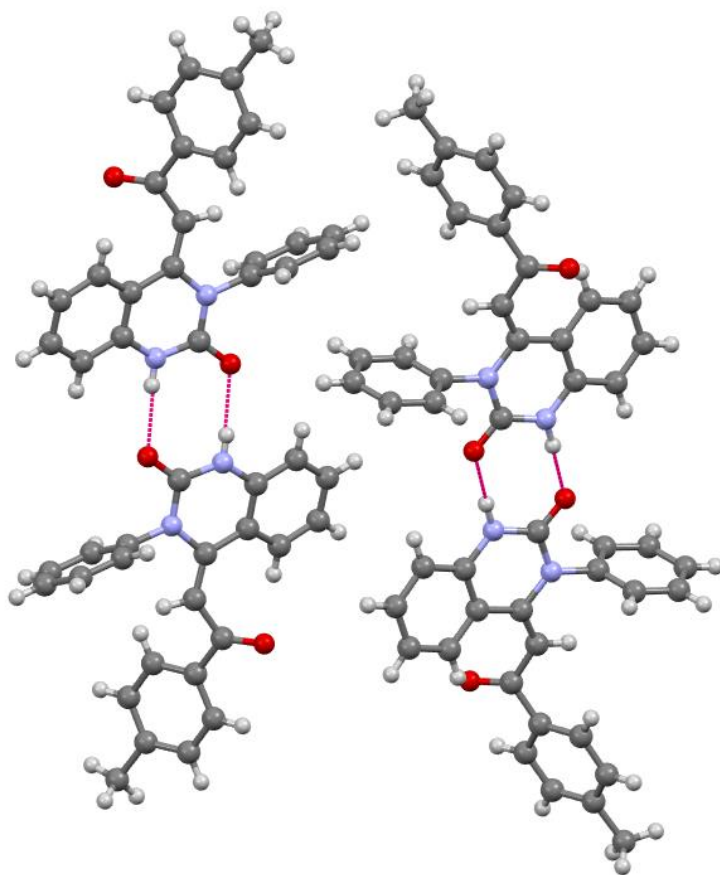

**Figure S04.** Part of the crystal structure of **5ba''**, showing the formation of a hydrogen bonding network.

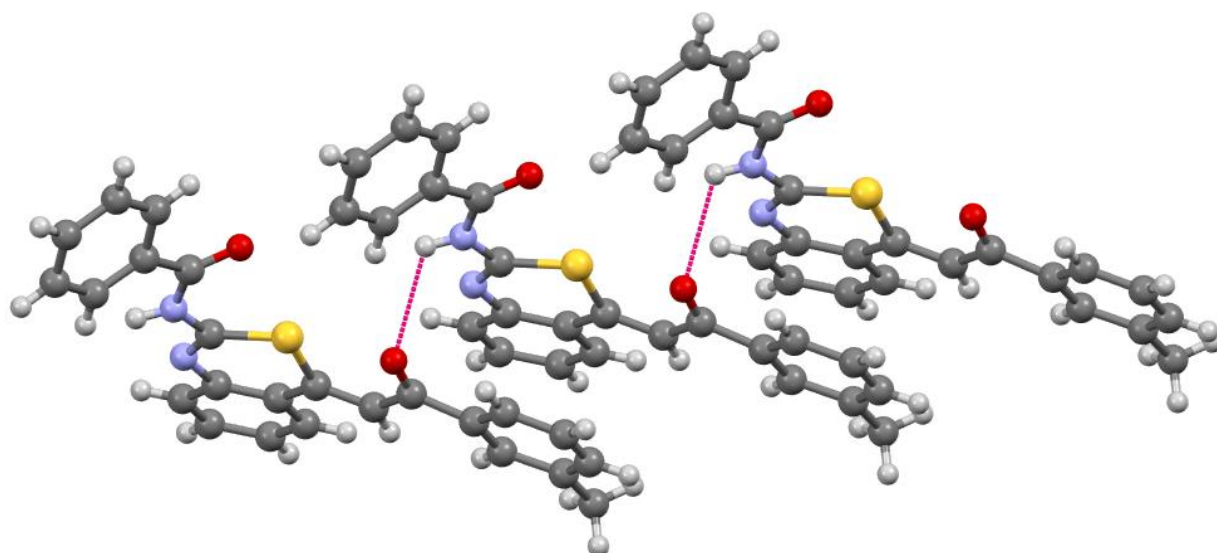

**Figure S05.** Part of the crystal structure of **9h**, showing the formation of a hydrogen bonding network.



**Quantum-Chemical calculations: optimized geometries (see Figures 1 and 4 of the main text), energies and harmonic frequencies**

Reaction B

R2

|   |           |           |           |
|---|-----------|-----------|-----------|
| C | 0.145989  | -0.000000 | -0.122484 |
| C | 0.002989  | -0.000000 | 1.267912  |
| C | 1.129062  | -0.000000 | 2.078939  |
| C | 2.400394  | -0.000000 | 1.505858  |
| C | 2.544928  | -0.000000 | 0.120971  |
| C | 1.419316  | -0.000000 | -0.694899 |
| H | -0.995422 | 0.000000  | 1.692079  |
| H | 1.018434  | -0.000000 | 3.158894  |
| H | 3.280871  | -0.000000 | 2.141729  |
| H | 3.535053  | -0.000000 | -0.324171 |
| H | 1.522470  | -0.000000 | -1.774730 |
| C | -1.081424 | 0.000000  | -0.950943 |
| O | -2.206141 | 0.000000  | -0.506618 |
| N | -0.846420 | 0.000000  | -2.344402 |
| C | -1.491954 | 0.000000  | -3.363482 |
| S | -2.221053 | 0.000000  | -4.745152 |

Frequencies

|           |           |           |
|-----------|-----------|-----------|
| 41.3395   | 55.9696   | 88.3037   |
| 170.6648  | 200.3670  | 321.2937  |
| 423.9269  | 442.0005  | 448.5596  |
| 494.2619  | 500.1749  | 636.1237  |
| 670.9365  | 701.6034  | 726.4135  |
| 744.8172  | 829.0753  | 884.0821  |
| 891.4022  | 984.2260  | 1023.7880 |
| 1030.6812 | 1042.0588 | 1065.5807 |
| 1121.3455 | 1151.8298 | 1198.4139 |
| 1214.3860 | 1313.1085 | 1358.0928 |
| 1370.2444 | 1512.4728 | 1555.6107 |
| 1672.6239 | 1691.1092 | 1800.2142 |
| 2082.6417 | 3215.0148 | 3226.0515 |
| 3235.0305 | 3245.1460 | 3249.3637 |

Energy -835.808185223 a.u.

PCM=-835.9339254

R1

|   |           |           |           |
|---|-----------|-----------|-----------|
| C | -1.499473 | -1.517807 | 0.040718  |
| C | -0.824704 | -0.287139 | -0.001909 |
| C | -1.562589 | 0.920878  | -0.028596 |
| C | -2.964114 | 0.845327  | -0.002237 |
| C | -3.606732 | -0.379248 | 0.044174  |
| C | -2.880822 | -1.574533 | 0.064095  |

|   |           |           |           |
|---|-----------|-----------|-----------|
| C | 0.595389  | -0.231195 | -0.007880 |
| C | 1.801884  | -0.105830 | -0.003503 |
| C | 3.240101  | 0.056075  | -0.000378 |
| C | 4.058514  | -1.209670 | -0.051643 |
| N | -0.924732 | 2.133345  | -0.120216 |
| O | 3.745271  | 1.164548  | 0.041846  |
| H | -3.542804 | 1.764807  | -0.027038 |
| H | -4.692471 | -0.406065 | 0.063289  |
| H | -3.391932 | -2.530603 | 0.098663  |
| H | -0.908902 | -2.428397 | 0.059194  |
| H | 3.820808  | -1.774431 | -0.959441 |
| H | 5.119800  | -0.955948 | -0.038349 |
| H | 3.816211  | -1.850395 | 0.802891  |
| H | -1.438552 | 2.965300  | 0.127469  |
| H | 0.070103  | 2.168704  | 0.056326  |

#### Frequencies

|           |           |           |
|-----------|-----------|-----------|
| 40.3680   | 50.5083   | 69.3488   |
| 103.6357  | 158.8604  | 168.4109  |
| 244.5928  | 286.1247  | 347.0302  |
| 395.0330  | 413.4945  | 437.3448  |
| 495.7149  | 520.6409  | 525.6487  |
| 585.4522  | 592.9918  | 623.0694  |
| 629.6842  | 690.7516  | 772.1227  |
| 776.6990  | 836.8022  | 883.9522  |
| 896.9963  | 980.0864  | 1001.4637 |
| 1012.5805 | 1060.0420 | 1062.1510 |
| 1091.0511 | 1172.2467 | 1197.7883 |
| 1207.2148 | 1301.1683 | 1337.7466 |
| 1360.8806 | 1375.5693 | 1425.2759 |
| 1492.9820 | 1499.8956 | 1520.7703 |
| 1555.1551 | 1648.5272 | 1682.4006 |
| 1703.6500 | 1781.6411 | 2324.6017 |
| 3081.7847 | 3147.3059 | 3190.8094 |
| 3205.0236 | 3220.8101 | 3227.7080 |
| 3243.8192 | 3609.0332 | 3720.0649 |

Energy: -516.145936015

PCM: -516.2671146

#### TS1B

|   |           |           |           |
|---|-----------|-----------|-----------|
| C | 1.420779  | -3.091211 | -0.758557 |
| C | 1.720942  | -1.737420 | -0.691439 |
| C | 3.020277  | -1.305068 | -0.390112 |
| C | 4.016035  | -2.264559 | -0.164799 |
| C | 3.718818  | -3.616244 | -0.242181 |
| C | 2.421127  | -4.029097 | -0.540820 |
| N | 0.668198  | -0.781769 | -0.855497 |
| C | -0.513517 | -0.677484 | 0.488285  |

|   |           |           |           |
|---|-----------|-----------|-----------|
| S | 0.195519  | -0.685879 | 1.949398  |
| C | 3.311359  | 0.091514  | -0.350935 |
| C | 3.492429  | 1.287935  | -0.366332 |
| C | 3.664684  | 2.732739  | -0.383193 |
| O | 2.826942  | 3.438386  | -0.911675 |
| N | -1.602103 | -0.572237 | -0.149626 |
| C | -2.854692 | -0.692326 | 0.470463  |
| O | -3.107112 | -1.559578 | 1.283052  |
| C | -3.886665 | 0.278470  | -0.003220 |
| C | -5.171527 | 0.192517  | 0.538435  |
| C | -6.158582 | 1.083708  | 0.138570  |
| C | -5.868651 | 2.068308  | -0.804762 |
| C | -4.589260 | 2.158872  | -1.346108 |
| C | -3.600130 | 1.265893  | -0.946947 |
| C | 4.903042  | 3.272800  | 0.279486  |
| H | 0.401299  | -3.407049 | -0.959796 |
| H | 2.183471  | -5.086632 | -0.592011 |
| H | 4.497211  | -4.351162 | -0.065309 |
| H | 5.021278  | -1.931053 | 0.068892  |
| H | 5.797882  | 2.837722  | -0.178289 |
| H | 4.922771  | 4.359146  | 0.180779  |
| H | 4.910465  | 2.993980  | 1.338769  |
| H | 0.053242  | -0.980147 | -1.645357 |
| H | -2.601409 | 1.328552  | -1.363975 |
| H | -4.360796 | 2.926651  | -2.079361 |
| H | -6.640729 | 2.765967  | -1.116561 |
| H | -7.155679 | 1.013325  | 0.563008  |
| H | -5.374135 | -0.578992 | 1.273556  |
| H | 1.035520  | 0.168680  | -0.949407 |

Frequencies:

|           |           |           |
|-----------|-----------|-----------|
| i220.3997 | 6.6142    | 16.5772   |
| 22.4597   | 35.2534   | 36.5108   |
| 50.9686   | 54.3148   | 67.7591   |
| 86.0469   | 111.7524  | 118.5290  |
| 147.8083  | 165.8979  | 183.0304  |
| 205.3558  | 233.8379  | 275.6157  |
| 289.8481  | 374.9113  | 387.3368  |
| 403.3099  | 425.5419  | 443.9561  |
| 478.0376  | 486.0835  | 494.2969  |
| 504.7003  | 528.2774  | 568.7710  |
| 585.5832  | 607.6234  | 615.8552  |
| 627.9813  | 637.2943  | 688.4592  |
| 694.5716  | 712.1604  | 732.3665  |
| 765.3268  | 774.5793  | 788.2774  |
| 802.7017  | 829.5375  | 849.0994  |
| 883.9867  | 884.3291  | 904.8315  |
| 916.2098  | 980.4575  | 991.6492  |
| 1003.9981 | 1021.7257 | 1029.9720 |
| 1031.1000 | 1037.2895 | 1062.8144 |
| 1064.0091 | 1080.0884 | 1102.5288 |

|           |           |           |
|-----------|-----------|-----------|
| 1119.3710 | 1131.8262 | 1182.5719 |
| 1195.2707 | 1197.4985 | 1204.5409 |
| 1210.4846 | 1215.6186 | 1261.3338 |
| 1313.3241 | 1333.4118 | 1336.8380 |
| 1355.0452 | 1365.2620 | 1373.4523 |
| 1427.0946 | 1491.6839 | 1497.8646 |
| 1509.8536 | 1520.1469 | 1554.3196 |
| 1562.6088 | 1658.4761 | 1671.5823 |
| 1678.4262 | 1691.4053 | 1695.3812 |
| 1700.7555 | 1790.8167 | 1795.0873 |
| 2349.1283 | 3082.4202 | 3147.7905 |
| 3195.1421 | 3208.9164 | 3220.8595 |
| 3222.7624 | 3230.8188 | 3231.1695 |
| 3241.8069 | 3248.2976 | 3249.9812 |
| 3250.1311 | 3467.5681 | 3558.1484 |

Energy: -1351.9247889

PCM: -1352.179599

## 1B

|   |           |           |           |
|---|-----------|-----------|-----------|
| C | 0.546984  | -0.276471 | -0.220144 |
| C | 0.333568  | -0.338569 | 1.158755  |
| C | 1.398774  | -0.632953 | 2.011210  |
| C | 2.667423  | -0.861691 | 1.488962  |
| C | 2.876395  | -0.796175 | 0.114006  |
| C | 1.814501  | -0.502906 | -0.740186 |
| C | -1.040568 | -0.073164 | 1.675787  |
| O | -1.991641 | 0.092078  | 0.933069  |
| N | -1.183399 | -0.116735 | 3.063247  |
| C | -1.710601 | 0.821336  | 3.727216  |
| S | -2.148050 | 2.418102  | 3.595289  |
| N | -2.047234 | 0.281504  | 5.241685  |
| C | -1.829120 | -1.114398 | 5.560810  |
| C | -2.746232 | -2.060494 | 5.085591  |
| C | -2.533770 | -3.406126 | 5.402202  |
| C | -1.428714 | -3.787468 | 6.152440  |
| C | -0.522311 | -2.832008 | 6.602908  |
| C | -0.724073 | -1.487811 | 6.306090  |
| C | -3.846462 | -1.643684 | 4.277412  |
| C | -4.732684 | -1.237988 | 3.562664  |
| C | -5.740389 | -0.768550 | 2.607450  |
| C | -5.367334 | 0.453352  | 1.821008  |
| O | -6.787567 | -1.372436 | 2.485259  |
| H | -0.019496 | -0.736592 | 6.652680  |
| H | 0.342115  | -3.129405 | 7.187370  |
| H | -1.273674 | -4.835848 | 6.385463  |
| H | -3.241253 | -4.144953 | 5.042050  |
| H | -5.223947 | 1.304911  | 2.496412  |
| H | -4.406487 | 0.302679  | 1.314902  |

|   |           |           |           |
|---|-----------|-----------|-----------|
| H | -6.157583 | 0.675801  | 1.102080  |
| H | 1.223664  | -0.688447 | 3.079967  |
| H | 3.493822  | -1.092339 | 2.154802  |
| H | 3.867615  | -0.973784 | -0.293308 |
| H | 1.977135  | -0.450645 | -1.812541 |
| H | -0.293365 | -0.045958 | -0.866104 |
| H | -3.031986 | 0.544960  | 5.346893  |
| H | -1.522497 | 0.904038  | 5.859765  |

Frequencies

|           |           |           |
|-----------|-----------|-----------|
| 13.0308   | 25.7534   | 29.6648   |
| 37.4452   | 51.1016   | 57.6677   |
| 65.4937   | 74.5012   | 86.2817   |
| 129.8992  | 149.8330  | 157.7681  |
| 166.1191  | 169.0135  | 219.5412  |
| 226.6889  | 239.7527  | 295.8498  |
| 349.3055  | 370.0681  | 389.6191  |
| 420.8918  | 424.0720  | 444.5177  |
| 475.8224  | 486.0710  | 501.3629  |
| 529.1951  | 551.9235  | 556.1242  |
| 584.5095  | 612.6699  | 615.4545  |
| 635.3216  | 637.4239  | 688.7326  |
| 692.2088  | 713.0569  | 740.8500  |
| 761.4017  | 777.9349  | 788.3650  |
| 832.0454  | 845.3630  | 868.9279  |
| 882.7531  | 899.0025  | 906.9673  |
| 915.8545  | 979.4394  | 989.2707  |
| 1011.9271 | 1019.8633 | 1031.0619 |
| 1031.2939 | 1037.0991 | 1063.4075 |
| 1064.7460 | 1081.7700 | 1113.2266 |
| 1135.6264 | 1138.4904 | 1195.6387 |
| 1201.5232 | 1209.2164 | 1209.6215 |
| 1219.2529 | 1244.0131 | 1291.5621 |
| 1320.1759 | 1321.8524 | 1332.3695 |
| 1356.3707 | 1365.7077 | 1374.4681 |
| 1438.1711 | 1487.8242 | 1498.2298 |
| 1510.3099 | 1518.4264 | 1554.9557 |
| 1562.5388 | 1648.3031 | 1665.8864 |
| 1671.6892 | 1692.1280 | 1703.9758 |
| 1713.0512 | 1781.0685 | 1801.5765 |
| 2362.0484 | 3074.1054 | 3137.7281 |
| 3191.2506 | 3209.1056 | 3214.1166 |
| 3220.3707 | 3230.1493 | 3231.3477 |
| 3243.1134 | 3245.2522 | 3249.3930 |
| 3251.7364 | 3457.0488 | 3535.2124 |

Energy: -1351.92818625

PCM: -1352.1846862

## 2B

|   |           |           |           |
|---|-----------|-----------|-----------|
| C | -0.000342 | -0.481263 | -0.012785 |
| C | 0.175125  | -0.055696 | 1.320343  |
| C | 1.411662  | -0.216423 | 1.941393  |
| C | 2.477049  | -0.791604 | 1.257302  |
| C | 2.318698  | -1.192508 | -0.066567 |
| C | 1.091491  | -1.034683 | -0.695435 |
| N | -0.901479 | 0.490482  | 2.069605  |
| H | 1.528379  | 0.118266  | 2.967751  |
| H | 3.433269  | -0.915026 | 1.755979  |
| H | 3.149853  | -1.632594 | -0.608116 |
| H | 0.951771  | -1.354420 | -1.722648 |
| C | -1.269659 | -0.382792 | -0.660092 |
| C | -2.338407 | -0.303645 | -1.218923 |
| C | -3.633106 | -0.186442 | -1.883969 |
| O | -3.747037 | -0.499831 | -3.054071 |
| C | -4.761992 | 0.339767  | -1.044800 |
| H | -4.894795 | -0.285027 | -0.154815 |
| H | -4.518719 | 1.347206  | -0.689620 |
| H | -5.677770 | 0.352464  | -1.638201 |
| H | -1.217699 | -0.018386 | 2.886062  |
| C | -1.689677 | 1.563816  | 1.756401  |
| S | -3.095256 | 1.861624  | 2.567129  |
| N | -1.129063 | 2.381602  | 0.788141  |
| H | -0.139241 | 2.254533  | 0.613888  |
| C | -1.792899 | 3.216204  | -0.115702 |
| O | -2.988462 | 3.179634  | -0.303437 |
| C | -0.888111 | 4.134059  | -0.875703 |
| C | 0.321184  | 4.604155  | -0.357770 |
| C | 1.107749  | 5.476098  | -1.103743 |
| C | 0.693855  | 5.876246  | -2.370884 |
| C | -0.515803 | 5.415539  | -2.886793 |
| C | -1.307889 | 4.553985  | -2.139399 |
| H | 0.636526  | 4.327317  | 0.644207  |
| H | 2.039592  | 5.849822  | -0.690578 |
| H | 1.310324  | 6.554040  | -2.953821 |
| H | -0.843087 | 5.730983  | -3.872669 |
| H | -2.258623 | 4.195780  | -2.519614 |

## Frequencies

|          |          |          |
|----------|----------|----------|
| 14.2124  | 27.2031  | 29.6013  |
| 42.2582  | 59.1585  | 65.5757  |
| 73.9690  | 83.6335  | 98.3610  |
| 128.6225 | 148.0517 | 162.5417 |
| 170.6325 | 183.0495 | 222.1298 |
| 250.6395 | 261.8966 | 302.7478 |
| 350.7236 | 383.8880 | 402.8160 |
| 417.1910 | 422.0599 | 458.0974 |

|           |           |           |
|-----------|-----------|-----------|
| 477.0257  | 506.7175  | 514.4733  |
| 537.3996  | 563.1784  | 569.3832  |
| 580.4677  | 613.9076  | 618.8957  |
| 632.4620  | 636.9637  | 650.5298  |
| 691.7670  | 699.6777  | 711.1898  |
| 731.1779  | 762.0764  | 791.2514  |
| 811.0313  | 847.5630  | 856.8388  |
| 880.6556  | 901.8879  | 922.0259  |
| 928.6875  | 970.3907  | 998.2123  |
| 1010.3580 | 1015.4233 | 1029.9633 |
| 1031.2525 | 1037.7351 | 1066.1368 |
| 1068.0083 | 1081.4745 | 1120.5930 |
| 1138.4671 | 1148.2175 | 1198.5910 |
| 1199.2559 | 1210.3154 | 1220.0306 |
| 1236.7582 | 1268.9158 | 1280.6918 |
| 1301.3729 | 1325.1619 | 1341.6265 |
| 1351.0270 | 1372.6609 | 1375.6859 |
| 1433.1519 | 1490.4757 | 1497.9504 |
| 1499.4179 | 1508.8064 | 1531.7990 |
| 1553.1895 | 1556.8396 | 1584.5142 |
| 1653.3430 | 1671.6448 | 1686.1467 |
| 1693.0184 | 1793.2410 | 1830.3056 |
| 2361.0760 | 3080.4473 | 3147.9852 |
| 3191.4351 | 3211.4148 | 3219.1425 |
| 3220.5018 | 3229.1322 | 3229.6085 |
| 3238.1965 | 3238.9852 | 3247.7224 |
| 3249.2343 | 3606.4909 | 3622.2695 |

Energy: -1351.97248823

PCM:-1352.22283588

## TS2B

|   |           |           |           |
|---|-----------|-----------|-----------|
| C | 5.783156  | -1.151447 | -1.798305 |
| H | 6.571277  | -1.451794 | -2.482666 |
| C | 4.457172  | -1.146894 | -2.221930 |
| H | 4.208001  | -1.443309 | -3.236483 |
| C | 6.096968  | -0.770596 | -0.495240 |
| H | 7.130015  | -0.773641 | -0.160716 |
| C | 3.447049  | -0.762309 | -1.346481 |
| H | 2.417334  | -0.763356 | -1.683884 |
| C | 3.755631  | -0.378781 | -0.039552 |
| C | 5.088501  | -0.386659 | 0.378987  |
| H | 5.311447  | -0.087887 | 1.397577  |
| C | 2.722879  | 0.044855  | 0.958827  |
| O | 3.020716  | 0.369764  | 2.092911  |
| N | 1.410867  | 0.043993  | 0.487414  |
| C | 0.319771  | 0.337648  | 1.214630  |
| S | -0.096565 | 0.739351  | 2.730305  |
| N | -0.681084 | 0.147493  | 0.073287  |

|   |           |           |           |
|---|-----------|-----------|-----------|
| C | -1.497490 | 1.251481  | -0.336739 |
| C | -2.851086 | 1.038819  | -0.640434 |
| C | -0.933439 | 2.513315  | -0.472215 |
| H | 0.110887  | 2.666980  | -0.220585 |
| C | -1.715264 | 3.572452  | -0.915283 |
| H | -1.270900 | 4.557620  | -1.014065 |
| C | -3.059050 | 3.376439  | -1.229327 |
| H | -3.665982 | 4.206498  | -1.575471 |
| C | -3.623031 | 2.117666  | -1.094076 |
| H | -4.668228 | 1.948328  | -1.329334 |
| C | -3.436847 | -0.254104 | -0.485028 |
| C | -3.936010 | -1.348983 | -0.351107 |
| C | -4.586494 | -2.642120 | -0.184289 |
| O | -5.705656 | -2.826862 | -0.619064 |
| C | -3.801109 | -3.698994 | 0.547493  |
| H | -2.866868 | -3.911941 | 0.016123  |
| H | -3.535429 | -3.346553 | 1.550026  |
| H | -4.398828 | -4.608827 | 0.619969  |
| H | 0.441401  | -0.094261 | -0.461055 |
| H | -1.255878 | -0.681821 | 0.240412  |

#### Frequencies

|            |           |           |
|------------|-----------|-----------|
| i1743.2821 | 12.2561   | 17.0876   |
| 21.0100    | 28.0885   | 36.4734   |
| 45.9768    | 68.1036   | 81.6908   |
| 97.8512    | 109.9374  | 132.9252  |
| 149.1044   | 166.7864  | 196.0722  |
| 208.8745   | 241.1927  | 259.0949  |
| 293.6848   | 327.3608  | 392.6900  |
| 421.6289   | 423.7579  | 452.4773  |
| 471.5494   | 482.5561  | 504.1868  |
| 513.0912   | 549.7315  | 569.4203  |
| 573.6910   | 602.1069  | 629.4134  |
| 637.5862   | 663.6433  | 691.0342  |
| 708.8717   | 714.2784  | 735.6573  |
| 757.4423   | 785.5480  | 805.2616  |
| 839.9408   | 848.7982  | 880.5789  |
| 882.8296   | 910.9078  | 933.1478  |
| 974.3822   | 986.9066  | 997.6926  |
| 1002.4321  | 1008.9110 | 1019.1790 |
| 1031.1072  | 1031.4133 | 1038.9465 |
| 1061.6556  | 1068.7112 | 1084.5241 |
| 1120.6363  | 1136.2223 | 1194.6446 |
| 1196.8639  | 1203.6613 | 1207.2063 |
| 1215.9272  | 1256.2968 | 1295.0946 |
| 1331.7578  | 1334.5603 | 1340.0010 |
| 1360.8971  | 1366.8469 | 1374.1829 |
| 1426.0837  | 1454.3215 | 1476.0075 |
| 1492.3743  | 1499.5268 | 1509.2849 |
| 1519.6430  | 1556.1015 | 1562.6295 |
| 1666.5826  | 1670.6002 | 1692.1134 |



|           |           |           |
|-----------|-----------|-----------|
| 1698.0777 | 1781.2798 | 1800.5740 |
| 2073.4096 | 2344.2697 | 3080.2253 |
| 3144.9628 | 3194.1962 | 3210.8641 |
| 3221.6559 | 3226.0283 | 3232.9524 |
| 3235.7638 | 3243.7212 | 3249.4876 |
| 3250.6370 | 3251.6922 | 3492.4932 |

Energy: -1351.89761375

PCM: -1352.147759

### TS3B

|   |           |           |           |
|---|-----------|-----------|-----------|
| C | -3.706498 | -0.265955 | -0.155260 |
| C | -4.089582 | 0.597289  | 0.873736  |
| H | -3.328385 | 1.105103  | 1.453576  |
| C | -5.437639 | 0.799092  | 1.149467  |
| H | -5.730939 | 1.470008  | 1.951344  |
| C | -6.408642 | 0.140883  | 0.399790  |
| H | -7.461156 | 0.298881  | 0.616536  |
| C | -6.030712 | -0.721771 | -0.627985 |
| H | -6.787067 | -1.236537 | -1.212623 |
| C | -4.685676 | -0.925008 | -0.904290 |
| H | -4.370807 | -1.593436 | -1.698401 |
| C | -2.278616 | -0.522564 | -0.492268 |
| O | -1.947820 | -1.279401 | -1.386402 |
| N | -1.350603 | 0.185462  | 0.300163  |
| C | -0.097281 | -0.002743 | 0.120940  |
| S | 0.886415  | -0.954643 | -0.868578 |
| N | 0.699130  | 0.876006  | 1.085319  |
| H | -0.002240 | 1.392746  | 1.625143  |
| H | 1.208747  | 0.233978  | 1.713761  |
| C | 1.674517  | 1.759847  | 0.436003  |
| C | 1.524598  | 3.135248  | 0.452679  |
| H | 0.670878  | 3.603585  | 0.934920  |
| C | 2.509041  | 3.901542  | -0.162910 |
| H | 2.425053  | 4.983053  | -0.167712 |
| C | 3.600240  | 3.276557  | -0.766417 |
| H | 4.369311  | 3.880462  | -1.237910 |
| C | 3.715791  | 1.890670  | -0.778968 |
| H | 4.562670  | 1.402835  | -1.248902 |
| C | 2.736123  | 1.099777  | -0.177159 |
| C | 2.754661  | -0.360984 | -0.110708 |
| C | 3.563394  | -1.232620 | 0.372346  |
| C | 3.536845  | -2.623136 | 0.675227  |
| O | 2.969954  | -3.049284 | 1.685480  |
| C | 4.307123  | -3.557647 | -0.235911 |
| H | 5.285918  | -3.764552 | 0.210787  |
| H | 3.763788  | -4.502729 | -0.314162 |
| H | 4.468700  | -3.130772 | -1.229995 |

Frequencies

|           |           |           |
|-----------|-----------|-----------|
| i190.8529 | 9.4528    | 25.7219   |
| 30.8936   | 49.8775   | 61.0463   |
| 70.9176   | 74.8840   | 81.9476   |
| 109.8698  | 136.5886  | 148.8072  |
| 175.4197  | 199.5089  | 215.1010  |
| 248.8289  | 281.8418  | 325.3871  |
| 360.5315  | 373.1216  | 423.8741  |
| 432.6829  | 452.0263  | 460.7972  |
| 484.7036  | 501.8964  | 508.7446  |
| 541.3945  | 563.7760  | 577.4895  |
| 611.2993  | 637.2646  | 648.9104  |
| 663.6089  | 693.3469  | 708.6777  |
| 724.0308  | 740.2396  | 743.4543  |
| 766.9732  | 781.2600  | 832.9792  |
| 845.2854  | 848.8480  | 883.5762  |
| 886.5762  | 905.6846  | 951.5240  |
| 982.0338  | 983.3325  | 1010.6665 |
| 1022.0053 | 1024.8586 | 1030.0122 |
| 1032.7243 | 1039.2353 | 1056.1215 |
| 1066.5273 | 1070.8154 | 1107.5466 |
| 1123.1465 | 1149.0282 | 1195.5881 |
| 1196.6878 | 1199.3611 | 1210.2640 |
| 1221.1070 | 1260.3986 | 1314.7320 |
| 1328.9699 | 1333.2935 | 1355.8112 |
| 1366.9392 | 1378.5624 | 1381.4568 |
| 1415.4257 | 1500.4393 | 1503.5292 |
| 1510.3273 | 1518.2088 | 1548.9253 |
| 1554.3422 | 1621.5719 | 1629.7321 |
| 1664.5393 | 1670.1737 | 1691.3423 |
| 1695.1012 | 1705.7529 | 1778.9622 |
| 1864.2997 | 3079.0598 | 3148.6070 |
| 3172.8393 | 3211.9088 | 3214.8946 |
| 3223.2848 | 3226.8952 | 3233.9058 |
| 3243.9432 | 3249.7156 | 3251.8276 |
| 3258.1025 | 3358.0216 | 3494.5649 |

Energy: -1351.89002930

PCM: -1352.14880222

3B

|   |           |           |           |
|---|-----------|-----------|-----------|
| C | 0.150932  | -0.846389 | 0.243198  |
| C | 0.083543  | -0.208435 | 1.485437  |
| C | 1.170713  | 0.543302  | 1.937610  |
| C | 2.314443  | 0.653867  | 1.154514  |
| C | 2.377240  | 0.015679  | -0.081288 |
| C | 1.293617  | -0.734327 | -0.536478 |
| C | -1.161180 | -0.361344 | 2.282791  |

|   |           |           |           |
|---|-----------|-----------|-----------|
| O | -2.113711 | -1.014326 | 1.894459  |
| N | -1.156764 | 0.304453  | 3.527691  |
| C | -2.177197 | 0.186094  | 4.286059  |
| N | -2.011962 | 0.956251  | 5.568543  |
| C | -2.099515 | 0.109534  | 6.775229  |
| C | -3.351226 | -0.472416 | 6.951621  |
| C | -4.347399 | -0.150952 | 5.912502  |
| S | -3.667499 | -0.645279 | 4.207391  |
| C | -3.539229 | -1.235744 | 8.102704  |
| C | -2.490740 | -1.408867 | 9.001537  |
| C | -1.241873 | -0.828928 | 8.774423  |
| C | -1.033105 | -0.047193 | 7.641729  |
| C | -5.422924 | 0.595546  | 6.051138  |
| C | -6.138340 | 1.283728  | 5.031964  |
| C | -7.536927 | 0.827182  | 4.674687  |
| O | -5.654782 | 2.303625  | 4.515939  |
| H | -4.511614 | -1.681206 | 8.282701  |
| H | -2.646131 | -2.007624 | 9.893728  |
| H | -0.432322 | -0.979039 | 9.480746  |
| H | -0.072500 | 0.424834  | 7.454820  |
| H | 1.113419  | 1.037837  | 2.899830  |
| H | 3.157531  | 1.239406  | 1.508542  |
| H | 3.271215  | 0.102970  | -0.691879 |
| H | 1.341636  | -1.230715 | -1.500827 |
| H | -0.703469 | -1.423753 | -0.093358 |
| H | -7.736444 | -0.195798 | 5.007805  |
| H | -8.263954 | 1.491539  | 5.154206  |
| H | -7.671111 | 0.904926  | 3.592364  |
| H | -1.115208 | 1.446838  | 5.493045  |
| H | -2.787368 | 1.645242  | 5.603753  |

#### Frequencies

|           |           |           |
|-----------|-----------|-----------|
| 14.2610   | 24.8293   | 33.1786   |
| 51.7726   | 67.5785   | 71.4411   |
| 80.4286   | 92.1309   | 124.7199  |
| 135.1662  | 146.1349  | 179.1084  |
| 183.4799  | 219.2338  | 247.7234  |
| 291.2519  | 336.6400  | 354.3124  |
| 372.9808  | 383.0226  | 423.4095  |
| 444.7246  | 454.6042  | 469.2620  |
| 487.5903  | 505.5583  | 532.3785  |
| 561.2727  | 582.2879  | 598.7619  |
| 631.0317  | 637.0327  | 646.6296  |
| 666.6359  | 698.1662  | 708.3118  |
| 723.1300  | 742.9916  | 759.0313  |
| 774.9491  | 805.1605  | 832.5730  |
| 846.7565  | 863.6993  | 881.7363  |
| 883.5912  | 905.3305  | 964.1225  |
| 981.3539  | 983.6007  | 1010.5696 |
| 1022.3727 | 1029.1091 | 1030.7403 |
| 1039.6907 | 1056.5810 | 1060.8609 |

|           |           |           |
|-----------|-----------|-----------|
| 1067.2083 | 1076.6221 | 1108.3873 |
| 1123.7134 | 1148.6164 | 1190.5873 |
| 1196.0114 | 1197.2097 | 1211.5188 |
| 1221.1062 | 1272.0824 | 1315.1415 |
| 1328.3496 | 1335.1958 | 1357.0538 |
| 1367.8980 | 1381.5554 | 1395.5530 |
| 1414.8208 | 1500.8291 | 1503.0052 |
| 1510.8515 | 1516.1529 | 1544.0379 |
| 1554.6908 | 1616.9141 | 1637.1934 |
| 1661.8304 | 1665.3883 | 1669.7973 |
| 1691.2394 | 1703.2323 | 1728.4512 |
| 1779.2830 | 3077.8370 | 3147.7798 |
| 3167.4704 | 3213.0723 | 3215.7771 |
| 3224.5228 | 3225.8403 | 3234.7643 |
| 3242.9354 | 3249.5726 | 3250.1742 |
| 3258.1036 | 3291.0402 | 3493.4368 |

Energy: -1351.89118531

PCM: -1352.14848778

1B-

|   |           |           |           |
|---|-----------|-----------|-----------|
| C | 0.641833  | 0.288088  | -0.142806 |
| C | 0.279382  | -0.262679 | 1.091483  |
| C | 1.262033  | -0.955357 | 1.834278  |
| C | 2.543951  | -1.121950 | 1.292763  |
| C | 2.881124  | -0.584429 | 0.058800  |
| C | 1.925295  | 0.139697  | -0.651377 |
| N | -1.010568 | -0.052891 | 1.580133  |
| C | -1.926998 | -1.038440 | 1.979267  |
| S | -3.468142 | -0.453248 | 2.420331  |
| C | 1.005768  | -1.402981 | 3.164213  |
| C | 0.839570  | -1.735630 | 4.315468  |
| C | 0.510338  | -2.122334 | 5.673462  |
| O | 1.337648  | -2.647711 | 6.404972  |
| N | -1.499419 | -2.271917 | 1.843261  |
| C | -1.968634 | -3.360620 | 2.488173  |
| O | -2.341219 | -3.426520 | 3.662960  |
| C | -1.915552 | -4.635657 | 1.673211  |
| C | -2.351314 | -5.826273 | 2.255868  |
| C | -2.335250 | -7.014861 | 1.533478  |
| C | -1.880822 | -7.025203 | 0.215805  |
| C | -1.444319 | -5.839709 | -0.371695 |
| C | -1.461920 | -4.651652 | 0.353676  |
| C | -0.903033 | -1.834726 | 6.092983  |
| H | -0.114960 | 0.819386  | -0.713534 |
| H | 2.173305  | 0.573793  | -1.616422 |
| H | 3.881949  | -0.719686 | -0.340396 |
| H | 3.279978  | -1.666371 | 1.876088  |
| H | -1.115472 | -0.764956 | 5.986009  |
| H | -1.594485 | -2.354806 | 5.416834  |
| H | -1.047690 | -2.150007 | 7.128790  |

|   |           |           |           |
|---|-----------|-----------|-----------|
| H | -1.122446 | -3.719974 | -0.085440 |
| H | -1.087349 | -5.840625 | -1.398713 |
| H | -1.866786 | -7.953471 | -0.350416 |
| H | -2.677991 | -7.936246 | 1.997998  |
| H | -2.700975 | -5.791493 | 3.282426  |
| H | -1.458906 | 0.822466  | 1.346733  |

Frequencies

|           |           |           |
|-----------|-----------|-----------|
| 16.8176   | 25.6897   | 30.9785   |
| 41.8192   | 57.8558   | 68.1673   |
| 76.6859   | 91.7843   | 111.9861  |
| 134.7518  | 159.4524  | 171.5887  |
| 176.1207  | 194.0923  | 230.3029  |
| 250.7703  | 260.4961  | 294.8666  |
| 359.0542  | 388.3542  | 405.2303  |
| 428.2251  | 454.3557  | 466.2490  |
| 482.3185  | 494.2886  | 512.3252  |
| 547.6299  | 560.1059  | 585.5580  |
| 616.6502  | 619.5716  | 632.0094  |
| 638.3457  | 642.6809  | 695.4677  |
| 698.8718  | 713.8334  | 726.9520  |
| 757.3885  | 774.6747  | 800.9009  |
| 837.2638  | 849.5394  | 880.3075  |
| 888.8132  | 908.8331  | 929.3803  |
| 970.5052  | 975.9008  | 1002.9684 |
| 1014.5457 | 1020.3750 | 1023.6526 |
| 1030.4774 | 1063.0273 | 1068.4080 |
| 1082.5695 | 1104.7270 | 1124.6188 |
| 1151.5595 | 1171.7195 | 1186.5687 |
| 1193.0177 | 1204.3964 | 1210.4332 |
| 1286.1891 | 1289.8563 | 1330.7585 |
| 1341.2130 | 1352.4868 | 1357.6360 |
| 1368.6604 | 1438.4143 | 1468.3415 |
| 1490.7103 | 1503.6850 | 1506.4136 |
| 1511.4499 | 1549.1658 | 1557.4332 |
| 1589.8331 | 1652.6527 | 1662.6029 |
| 1684.3763 | 1688.2787 | 1712.7084 |
| 1766.9526 | 2350.7473 | 3057.7662 |
| 3129.0481 | 3173.9825 | 3186.6647 |
| 3198.3088 | 3199.8790 | 3212.7523 |
| 3213.5150 | 3221.4008 | 3233.9331 |
| 3242.1373 | 3246.6355 | 3636.9220 |

Energy: -1351.45361416

PCM: -1351.76385044

TS3B-

|   |          |          |          |
|---|----------|----------|----------|
| C | 2.953739 | 0.942390 | 0.097761 |
|---|----------|----------|----------|

|   |           |           |           |
|---|-----------|-----------|-----------|
| C | 4.271529  | 1.421790  | 0.116650  |
| H | 5.069510  | 0.705505  | -0.052786 |
| C | 4.558606  | 2.759419  | 0.346565  |
| H | 5.589653  | 3.103095  | 0.346898  |
| C | 3.510118  | 3.650723  | 0.579507  |
| H | 3.713707  | 4.702146  | 0.768206  |
| C | 2.202475  | 3.192238  | 0.570385  |
| H | 1.372362  | 3.866611  | 0.758985  |
| C | 1.889219  | 1.846025  | 0.317841  |
| C | 2.759395  | -0.486337 | -0.065836 |
| C | 3.238913  | -1.610081 | 0.201792  |
| C | 3.246073  | -3.023679 | 0.219867  |
| O | 3.959260  | -3.728630 | -0.502878 |
| C | 2.300718  | -3.666801 | 1.224358  |
| H | 1.268392  | -3.523933 | 0.884564  |
| H | 2.517402  | -4.736095 | 1.292212  |
| H | 2.390366  | -3.199630 | 2.210177  |
| N | 0.541304  | 1.513862  | 0.357977  |
| C | 0.039226  | 0.549124  | -0.352990 |
| N | -1.354027 | 0.428409  | -0.107741 |
| H | -1.635901 | 1.079627  | 0.614617  |
| C | -2.340300 | -0.267585 | -0.747718 |
| O | -2.220796 | -0.887931 | -1.790247 |
| C | -3.683780 | -0.202048 | -0.054886 |
| C | -3.832885 | -0.030527 | 1.322520  |
| H | -2.958524 | 0.054672  | 1.961154  |
| C | -5.101799 | -0.006847 | 1.895958  |
| H | -5.204467 | 0.116070  | 2.970503  |
| C | -6.232263 | -0.149424 | 1.097220  |
| H | -7.222236 | -0.127686 | 1.544779  |
| C | -6.088492 | -0.330143 | -0.277318 |
| H | -6.966977 | -0.448906 | -0.905623 |
| C | -4.821511 | -0.364639 | -0.846716 |
| H | -4.685653 | -0.525480 | -1.911131 |
| S | 0.852738  | -0.515818 | -1.417883 |

Frequencies

|           |          |          |
|-----------|----------|----------|
| i209.3872 | 16.5582  | 21.3248  |
| 39.0530   | 48.3312  | 56.7563  |
| 62.8441   | 73.7521  | 82.8514  |
| 98.5027   | 106.9394 | 154.0981 |
| 165.6822  | 201.2684 | 232.0376 |
| 256.1075  | 266.3678 | 304.5615 |
| 322.8184  | 390.6317 | 413.7179 |
| 421.4398  | 424.8763 | 482.8177 |
| 493.1371  | 517.0072 | 522.6015 |
| 563.4133  | 580.2769 | 596.6450 |
| 611.3797  | 637.9383 | 639.8059 |
| 665.7916  | 690.3248 | 702.6398 |
| 708.4595  | 714.9978 | 728.8022 |
| 736.5965  | 766.2517 | 781.7112 |

|           |           |           |
|-----------|-----------|-----------|
| 818.0987  | 844.7321  | 879.9030  |
| 891.1012  | 902.0644  | 945.5476  |
| 965.0508  | 974.3616  | 995.1346  |
| 996.0687  | 1012.2544 | 1026.3444 |
| 1029.9423 | 1054.2795 | 1067.9861 |
| 1079.4426 | 1117.4108 | 1127.8539 |
| 1152.2562 | 1184.2256 | 1192.5345 |
| 1199.0474 | 1217.0822 | 1232.9349 |
| 1267.1743 | 1296.6672 | 1300.6051 |
| 1319.3483 | 1348.4385 | 1351.6341 |
| 1369.3231 | 1407.6279 | 1488.5350 |
| 1498.2152 | 1502.1915 | 1505.3429 |
| 1531.6241 | 1546.7220 | 1561.1292 |
| 1592.1050 | 1640.2329 | 1670.1079 |
| 1679.4803 | 1692.9991 | 1695.4413 |
| 1795.4190 | 2062.7057 | 3071.2010 |
| 3140.1877 | 3164.3160 | 3188.5476 |
| 3199.4807 | 3206.6326 | 3210.6070 |
| 3220.0024 | 3222.0651 | 3229.0355 |
| 3229.8672 | 3243.9933 | 3617.0752 |

Energy: -1351.4313989

PCM: -1351.75916441

TS3B<sub>N</sub>-

|   |           |           |           |
|---|-----------|-----------|-----------|
| C | -2.404437 | 0.426637  | -0.065697 |
| C | -3.447652 | 1.362274  | -0.039986 |
| H | -3.180815 | 2.400523  | 0.128280  |
| C | -4.771515 | 1.000069  | -0.237622 |
| H | -5.552627 | 1.754171  | -0.211778 |
| C | -5.081068 | -0.338788 | -0.474524 |
| H | -6.110178 | -0.648470 | -0.635556 |
| C | -4.069040 | -1.283850 | -0.497981 |
| H | -4.304813 | -2.330548 | -0.676548 |
| C | -2.729003 | -0.923123 | -0.292071 |
| C | -1.045617 | 0.930490  | 0.064440  |
| C | -0.359616 | 1.967976  | 0.002515  |
| C | 0.393568  | 3.145301  | -0.073978 |
| O | 0.918621  | 3.575173  | -1.110887 |
| C | 0.568016  | 3.904413  | 1.235980  |
| H | 1.269320  | 3.364812  | 1.881701  |
| H | 0.969455  | 4.897397  | 1.018036  |
| H | -0.378097 | 3.991062  | 1.780223  |
| N | -1.773195 | -1.929871 | -0.348046 |
| H | -2.107973 | -2.872234 | -0.489500 |
| C | -0.497619 | -1.878733 | 0.188510  |
| N | -0.121223 | -0.690859 | 0.590411  |
| C | 1.137824  | -0.469604 | 1.169923  |

|   |          |           |           |
|---|----------|-----------|-----------|
| O | 1.249995 | -0.239382 | 2.359107  |
| C | 2.318885 | -0.401690 | 0.255749  |
| C | 2.169566 | -0.189197 | -1.113657 |
| H | 1.175584 | -0.072548 | -1.530040 |
| C | 3.291572 | -0.093118 | -1.930383 |
| H | 3.168161 | 0.089915  | -2.993820 |
| C | 4.565367 | -0.222046 | -1.385507 |
| H | 5.440872 | -0.152102 | -2.026201 |
| C | 4.718136 | -0.433827 | -0.015428 |
| H | 5.711892 | -0.534553 | 0.413242  |
| C | 3.598822 | -0.512901 | 0.802234  |
| H | 3.693682 | -0.669070 | 1.871719  |
| S | 0.373776 | -3.343830 | 0.264552  |

#### Frequencies

|           |           |           |
|-----------|-----------|-----------|
| i284.1196 | -55.2147  | -2.0250   |
| 22.2586   | 27.7541   | 40.9741   |
| 52.0100   | 72.4130   | 78.0298   |
| 97.8369   | 113.2871  | 144.1661  |
| 164.6986  | 199.8299  | 228.0988  |
| 251.4407  | 265.4586  | 303.0043  |
| 349.4621  | 392.2508  | 400.5802  |
| 421.9079  | 430.2925  | 466.7393  |
| 497.2212  | 530.2066  | 539.7488  |
| 569.6638  | 581.0017  | 585.8088  |
| 591.9117  | 623.1446  | 637.0076  |
| 641.1387  | 652.9586  | 663.6318  |
| 707.2317  | 708.9062  | 728.5222  |
| 757.8949  | 763.8150  | 770.5058  |
| 848.2911  | 854.6425  | 871.1365  |
| 877.1850  | 905.4177  | 937.5895  |
| 966.2057  | 967.6234  | 995.2325  |
| 1002.0646 | 1008.7986 | 1020.7285 |
| 1031.4774 | 1053.8310 | 1065.7183 |
| 1087.1867 | 1111.7070 | 1126.9009 |
| 1157.7881 | 1190.1681 | 1192.6161 |
| 1201.4225 | 1211.7772 | 1222.8178 |
| 1283.6141 | 1298.0364 | 1320.4252 |
| 1342.0411 | 1352.4697 | 1366.8944 |
| 1371.0334 | 1410.8527 | 1476.0143 |
| 1497.5969 | 1503.4992 | 1508.4204 |
| 1526.3190 | 1554.8004 | 1563.7984 |
| 1602.4571 | 1667.5919 | 1672.6530 |
| 1682.7961 | 1688.8717 | 1692.6671 |
| 1781.1716 | 2095.5803 | 3073.5496 |
| 3141.6528 | 3164.9871 | 3190.0379 |
| 3193.0171 | 3205.7891 | 3209.0725 |
| 3220.4800 | 3222.2813 | 3236.5320 |
| 3241.3039 | 3255.6504 | 3650.6408 |

Energy: -1351.43029024



PCM: -1351.75633465

3B<sub>N</sub>-

|   |           |           |           |
|---|-----------|-----------|-----------|
| C | -0.050083 | 0.015583  | -0.176372 |
| C | -0.214344 | 1.217129  | 0.513687  |
| C | 0.893045  | 2.026287  | 0.762931  |
| C | 2.154106  | 1.635520  | 0.328241  |
| C | 2.315825  | 0.433701  | -0.355908 |
| C | 1.210360  | -0.376811 | -0.607460 |
| C | -1.594502 | 1.609847  | 0.917713  |
| O | -2.579191 | 1.016499  | 0.561821  |
| N | -1.700454 | 2.800972  | 1.744297  |
| C | -2.218375 | 3.930226  | 1.238639  |
| N | -2.368996 | 4.958349  | 2.134083  |
| C | -1.753737 | 5.011317  | 3.390785  |
| C | -1.213356 | 3.830492  | 3.914482  |
| C | -1.363725 | 2.569419  | 3.161786  |
| C | -1.686308 | 6.212362  | 4.094064  |
| C | -1.060861 | 6.249733  | 5.335972  |
| C | -0.494055 | 5.090164  | 5.860419  |
| C | -0.564723 | 3.895480  | 5.149543  |
| S | -2.633502 | 4.192975  | -0.376289 |
| C | -1.202433 | 1.323311  | 3.569159  |
| C | -0.872165 | 0.713188  | 4.785067  |
| O | 0.283315  | 0.470022  | 5.200330  |
| C | -2.052064 | 0.189505  | 5.605804  |
| H | -0.108215 | 2.991956  | 5.540667  |
| H | 0.011477  | 5.114778  | 6.821631  |
| H | -1.009975 | 7.185929  | 5.885332  |
| H | -2.124442 | 7.111863  | 3.667027  |
| H | -1.897526 | 0.460628  | 6.655802  |
| H | -2.074208 | -0.904662 | 5.544466  |
| H | -3.013105 | 0.578196  | 5.255528  |
| H | 0.765509  | 2.955633  | 1.306267  |
| H | 3.013657  | 2.267474  | 0.532297  |
| H | 3.303695  | 0.126207  | -0.689079 |
| H | 1.333039  | -1.317476 | -1.137430 |
| H | -0.924588 | -0.599071 | -0.360515 |
| H | -2.672492 | 5.820990  | 1.704768  |

Frequencies

|          |          |          |
|----------|----------|----------|
| 15.8921  | 28.7824  | 36.6673  |
| 51.6239  | 68.3279  | 77.9827  |
| 89.6173  | 100.0252 | 123.4091 |
| 149.4409 | 159.8093 | 166.5346 |
| 206.5204 | 239.1107 | 269.2158 |
| 275.0229 | 284.9642 | 377.2023 |
| 391.2699 | 416.8740 | 422.3717 |

|           |           |           |
|-----------|-----------|-----------|
| 436.4132  | 440.1965  | 504.5277  |
| 525.4579  | 531.2177  | 549.2137  |
| 574.9371  | 589.9738  | 606.2774  |
| 635.7806  | 636.2939  | 638.0169  |
| 653.2069  | 676.5630  | 699.1877  |
| 708.8015  | 719.0422  | 771.2331  |
| 776.1853  | 784.7386  | 812.2187  |
| 870.4552  | 870.8757  | 886.1311  |
| 905.2328  | 949.2702  | 967.1560  |
| 967.6508  | 996.4156  | 1009.4466 |
| 1017.9337 | 1021.4156 | 1024.6097 |
| 1032.0819 | 1055.5420 | 1067.4640 |
| 1084.6860 | 1119.7349 | 1131.6267 |
| 1174.6243 | 1190.4115 | 1191.0283 |
| 1212.3505 | 1216.7054 | 1265.6964 |
| 1283.9379 | 1294.2533 | 1320.9787 |
| 1334.2786 | 1352.7809 | 1354.3176 |
| 1367.2674 | 1398.1625 | 1470.3924 |
| 1498.2886 | 1502.8545 | 1505.2636 |
| 1510.7561 | 1556.5074 | 1557.9240 |
| 1566.6743 | 1614.3648 | 1674.5502 |
| 1674.8248 | 1688.4411 | 1693.4588 |
| 1798.9726 | 1842.6704 | 3063.5190 |
| 3130.6679 | 3148.6241 | 3188.4650 |
| 3196.7824 | 3204.4232 | 3211.5240 |
| 3220.6849 | 3222.7058 | 3241.1290 |
| 3246.0607 | 3251.4760 | 3649.3995 |

Energy: -1351.45056525

PCM: -1351.77943999

3B-

|   |           |           |           |
|---|-----------|-----------|-----------|
| C | -5.002441 | -1.142705 | -0.650441 |
| C | -4.027724 | -0.386634 | 0.011518  |
| C | -4.458886 | 0.641366  | 0.859476  |
| C | -5.816960 | 0.922240  | 1.016752  |
| C | -6.766894 | 0.173905  | 0.333104  |
| C | -6.356354 | -0.866069 | -0.499677 |
| C | -2.587779 | -0.619896 | -0.211929 |
| S | -1.527004 | -0.313346 | 1.252687  |
| C | -2.263264 | 1.104288  | 1.939614  |
| N | -3.524991 | 1.435916  | 1.546556  |
| N | -1.734444 | 1.941691  | 2.809602  |
| C | -0.517439 | 1.697843  | 3.376263  |
| O | 0.108879  | 0.640010  | 3.325489  |
| C | -1.999984 | -1.101990 | -1.289303 |
| C | -2.389487 | -1.542171 | -2.555551 |
| O | -2.738125 | -2.707880 | -2.857423 |

|   |           |           |           |
|---|-----------|-----------|-----------|
| C | 0.051288  | 2.860666  | 4.150462  |
| C | 1.286791  | 2.700049  | 4.779886  |
| C | 1.853390  | 3.746025  | 5.499624  |
| C | 1.188154  | 4.966864  | 5.597506  |
| C | -0.044725 | 5.133500  | 4.971129  |
| C | -0.610470 | 4.085344  | 4.250859  |
| C | -2.253473 | -0.518132 | -3.683104 |
| H | -4.667432 | -1.946481 | -1.299324 |
| H | -7.091174 | -1.464225 | -1.031310 |
| H | -7.822667 | 0.397873  | 0.459342  |
| H | -6.124558 | 1.730681  | 1.677135  |
| H | -3.877825 | 2.248082  | 2.037836  |
| H | -1.568794 | 4.198893  | 3.757698  |
| H | -0.567351 | 6.083848  | 5.042952  |
| H | 1.629974  | 5.785847  | 6.159441  |
| H | 2.816515  | 3.610476  | 5.984697  |
| H | 1.785911  | 1.741084  | 4.687803  |
| H | -3.178555 | -0.522972 | -4.269983 |
| H | -1.435692 | -0.819422 | -4.347825 |
| H | -2.052540 | 0.492032  | -3.312963 |

#### Frequencies

|           |           |           |
|-----------|-----------|-----------|
| 15.4975   | 28.9448   | 51.0077   |
| 57.2284   | 66.4543   | 74.6827   |
| 87.8116   | 110.6326  | 123.6061  |
| 134.9928  | 154.2691  | 165.3007  |
| 202.7371  | 229.5859  | 264.3370  |
| 278.3824  | 313.3245  | 360.0050  |
| 368.3925  | 426.1079  | 427.7538  |
| 446.7878  | 464.8896  | 487.1320  |
| 504.4915  | 508.1448  | 543.4744  |
| 571.5082  | 575.8240  | 601.4081  |
| 638.2381  | 645.8900  | 674.4515  |
| 680.1310  | 691.9875  | 703.3057  |
| 713.8253  | 732.8799  | 740.0189  |
| 768.4255  | 776.8555  | 832.0746  |
| 839.1123  | 858.8483  | 882.9451  |
| 888.2904  | 920.1603  | 941.8163  |
| 968.4011  | 975.9397  | 999.9804  |
| 1021.8125 | 1022.0860 | 1028.6965 |
| 1031.0525 | 1051.9511 | 1063.7380 |
| 1085.0407 | 1108.4402 | 1134.6159 |
| 1156.6005 | 1189.0073 | 1191.8742 |
| 1203.7104 | 1215.3329 | 1259.3573 |
| 1290.3020 | 1312.1229 | 1330.3517 |
| 1350.9049 | 1357.8751 | 1359.7119 |
| 1378.4685 | 1398.2038 | 1466.7243 |
| 1498.2980 | 1503.3724 | 1505.2046 |
| 1515.6975 | 1550.7993 | 1554.6141 |
| 1578.7543 | 1601.8619 | 1665.5358 |
| 1669.3970 | 1685.1865 | 1690.3108 |

|           |           |           |
|-----------|-----------|-----------|
| 1727.9179 | 1789.3951 | 3062.2096 |
| 3129.7523 | 3146.2106 | 3183.9796 |
| 3193.2288 | 3202.9529 | 3205.9303 |
| 3218.9194 | 3219.5043 | 3233.8433 |
| 3243.9537 | 3254.4377 | 3615.8534 |

Energy: -1351.41854681

PCM: -1351.77430662

P1

|   |           |           |           |
|---|-----------|-----------|-----------|
| C | -0.664231 | 4.069605  | 4.335557  |
| C | 0.005116  | 2.870505  | 4.082478  |
| C | 1.298584  | 2.683812  | 4.576357  |
| C | 1.916205  | 3.685232  | 5.314180  |
| C | 1.245274  | 4.881172  | 5.564204  |
| C | -0.044271 | 5.071560  | 5.074573  |
| C | -0.616791 | 1.771861  | 3.288412  |
| O | -0.017234 | 0.721274  | 3.073256  |
| N | -1.901413 | 2.016585  | 2.841352  |
| C | -2.435901 | 1.233805  | 1.956923  |
| S | -1.621774 | -0.124255 | 1.169594  |
| C | -2.717346 | -0.378386 | -0.234362 |
| C | -4.159212 | -0.323675 | 0.043889  |
| C | -4.618755 | 0.642366  | 0.951168  |
| N | -3.723435 | 1.497426  | 1.605629  |
| C | -5.981449 | 0.778573  | 1.216360  |
| C | -6.891071 | -0.079950 | 0.618926  |
| C | -6.444605 | -1.086836 | -0.234513 |
| C | -5.092651 | -1.201670 | -0.519118 |
| C | -2.062508 | -0.643264 | -1.385481 |
| C | -2.588314 | -0.871218 | -2.754514 |
| C | -1.528738 | -0.891553 | -3.835402 |
| O | -3.767093 | -1.009931 | -3.031649 |
| H | -4.747781 | -1.966388 | -1.199730 |
| H | -7.150216 | -1.774655 | -0.688363 |
| H | -7.949639 | 0.026478  | 0.835101  |
| H | -6.319574 | 1.544426  | 1.909125  |
| H | -4.118930 | 2.260834  | 2.142958  |
| H | -1.668438 | 4.204972  | 3.951537  |
| H | -0.568504 | 6.002552  | 5.269274  |
| H | 1.728080  | 5.664395  | 6.141726  |
| H | 2.921729  | 3.534927  | 5.695831  |
| H | 1.802992  | 1.745821  | 4.370405  |
| H | -1.999797 | -1.053292 | -4.805555 |
| H | -0.801561 | -1.688684 | -3.641672 |
| H | -0.974359 | 0.053759  | -3.848449 |
| H | -0.976758 | -0.598477 | -1.338753 |

Frequencies

|           |           |           |
|-----------|-----------|-----------|
| 17.4098   | 25.4565   | 32.1219   |
| 55.0377   | 60.2022   | 80.9035   |
| 98.4715   | 122.8626  | 135.1099  |
| 161.8263  | 180.8280  | 193.4125  |
| 205.6677  | 224.4426  | 261.1591  |
| 269.6434  | 302.6055  | 339.7087  |
| 383.1873  | 399.5945  | 425.3488  |
| 459.7758  | 466.6105  | 490.3943  |
| 517.7579  | 537.0383  | 550.5270  |
| 570.1495  | 586.7871  | 623.1651  |
| 637.3257  | 638.4732  | 681.9269  |
| 690.3276  | 697.1916  | 712.1705  |
| 736.0338  | 743.3876  | 747.1914  |
| 771.7241  | 782.0810  | 844.5887  |
| 856.2029  | 873.7332  | 884.3958  |
| 887.1623  | 896.2080  | 941.7988  |
| 974.4923  | 982.6191  | 982.8000  |
| 1017.0229 | 1019.3574 | 1022.5063 |
| 1031.1278 | 1036.8744 | 1061.8762 |
| 1065.2220 | 1090.6679 | 1115.2372 |
| 1136.9970 | 1159.5266 | 1195.1348 |
| 1201.3088 | 1209.5114 | 1220.7898 |
| 1232.0498 | 1266.6725 | 1306.7124 |
| 1335.6235 | 1349.9614 | 1356.2812 |
| 1363.3649 | 1390.3053 | 1421.2919 |
| 1446.2705 | 1479.0137 | 1496.8306 |
| 1504.2766 | 1510.1971 | 1542.0530 |
| 1552.8065 | 1556.7234 | 1610.1983 |
| 1657.9570 | 1668.4341 | 1682.6800 |
| 1692.0540 | 1698.4591 | 1738.2247 |
| 1807.2518 | 3075.4312 | 3136.1742 |
| 3193.3249 | 3195.2785 | 3208.5059 |
| 3209.0651 | 3220.4863 | 3226.8338 |
| 3231.0349 | 3241.2653 | 3247.3669 |
| 3257.3970 | 3292.8066 | 3607.0423 |

Energy: -1352.02021844

PCM: -1352.27877541

P2

|   |           |          |           |
|---|-----------|----------|-----------|
| C | -0.072494 | 0.092280 | -0.255749 |
| C | -0.222659 | 1.217616 | 0.566606  |
| H | 0.634848  | 1.851345 | 0.741594  |
| C | -1.438916 | 1.505166 | 1.168498  |
| H | -1.525080 | 2.380917 | 1.803130  |
| C | -2.538181 | 0.673657 | 0.964377  |
| H | -3.488789 | 0.891788 | 1.441417  |

|   |           |           |           |
|---|-----------|-----------|-----------|
| C | -2.425303 | -0.430066 | 0.134945  |
| H | -3.278917 | -1.075773 | -0.051554 |
| C | -1.205948 | -0.706575 | -0.481577 |
| N | -1.109925 | -1.788626 | -1.349723 |
| C | -0.095159 | -1.967336 | -2.230695 |
| N | 1.000990  | -1.175594 | -2.016644 |
| C | 1.193183  | -0.316296 | -0.894211 |
| C | 2.481333  | -0.024027 | -0.564811 |
| H | 3.231368  | -0.572096 | -1.119474 |
| C | 3.093805  | 0.810546  | 0.483304  |
| C | 4.545915  | 0.471181  | 0.756122  |
| H | 4.919687  | 1.101624  | 1.563690  |
| H | 5.149951  | 0.635959  | -0.143595 |
| H | 4.654401  | -0.584527 | 1.027648  |
| O | 2.557470  | 1.721405  | 1.098572  |
| C | 2.091926  | -1.337896 | -2.997083 |
| O | 2.980581  | -2.115890 | -2.772071 |
| C | 2.042670  | -0.431129 | -4.165958 |
| C | 1.068813  | 0.559751  | -4.305737 |
| H | 0.298862  | 0.677750  | -3.551297 |
| C | 1.084518  | 1.396374  | -5.414864 |
| H | 0.327231  | 2.166801  | -5.520243 |
| C | 2.067202  | 1.242586  | -6.388989 |
| H | 2.075257  | 1.894931  | -7.257212 |
| C | 3.039244  | 0.252398  | -6.253928 |
| H | 3.803050  | 0.130721  | -7.015617 |
| C | 3.029714  | -0.580875 | -5.144919 |
| H | 3.775355  | -1.358882 | -5.022247 |
| S | -0.205831 | -3.056089 | -3.484941 |
| H | -1.927367 | -2.358917 | -1.524009 |

#### Frequencies

|           |           |           |
|-----------|-----------|-----------|
| 13.0242   | 28.5201   | 37.1073   |
| 42.5039   | 50.7787   | 78.9481   |
| 113.3868  | 124.7419  | 154.1371  |
| 159.8420  | 162.3900  | 191.4049  |
| 219.9122  | 246.6974  | 259.2105  |
| 267.2455  | 286.0992  | 351.9063  |
| 388.9974  | 397.0461  | 421.0618  |
| 437.9807  | 443.8012  | 514.1110  |
| 528.2811  | 551.2263  | 560.0618  |
| 592.6500  | 611.2956  | 615.5328  |
| 635.7661  | 641.6458  | 651.2673  |
| 676.0947  | 689.9382  | 708.3135  |
| 721.3170  | 734.8325  | 777.2464  |
| 782.7356  | 793.8485  | 827.0041  |
| 875.0428  | 878.7783  | 895.2060  |
| 898.5314  | 928.6376  | 978.2474  |
| 991.3639  | 996.4943  | 1005.5402 |
| 1019.9728 | 1030.8492 | 1040.0173 |

|           |           |           |
|-----------|-----------|-----------|
| 1040.1358 | 1062.2087 | 1067.1647 |
| 1083.9987 | 1093.3339 | 1127.9646 |
| 1140.3064 | 1181.6998 | 1198.6257 |
| 1201.7794 | 1216.0708 | 1224.7867 |
| 1248.9681 | 1280.0404 | 1295.4758 |
| 1309.9719 | 1348.2601 | 1356.0012 |
| 1371.8278 | 1372.6802 | 1422.0606 |
| 1423.2246 | 1489.7551 | 1498.0604 |
| 1505.7714 | 1510.0335 | 1513.3430 |
| 1555.6088 | 1559.8004 | 1584.4480 |
| 1638.4032 | 1672.2566 | 1680.6667 |
| 1690.5082 | 1702.4106 | 1791.4951 |
| 1841.7110 | 3077.6831 | 3139.3847 |
| 3193.7304 | 3211.4116 | 3216.1915 |
| 3226.9731 | 3227.6872 | 3236.3222 |
| 3241.2498 | 3247.9150 | 3251.4173 |
| 3257.0277 | 3284.2249 | 3636.6144 |

Energy: -1352.02330437

PCM: -1352.28291720

3B<sub>2</sub>-

|   |           |           |           |
|---|-----------|-----------|-----------|
| C | -4.842561 | -0.581525 | -1.110083 |
| C | -3.986422 | -0.059497 | -0.138778 |
| C | -4.525662 | 0.468570  | 1.035100  |
| C | -5.898586 | 0.452970  | 1.247376  |
| C | -6.749076 | -0.077669 | 0.279223  |
| C | -6.219077 | -0.588555 | -0.901766 |
| C | -2.490046 | 0.002594  | -0.302322 |
| O | -1.829749 | 0.845175  | 0.283280  |
| N | -1.965048 | -0.952562 | -1.126621 |
| C | -0.631744 | -1.146886 | -1.548690 |
| S | 0.517653  | 0.161498  | -1.380613 |
| C | 1.672892  | -0.327472 | -2.722892 |
| C | 1.881027  | -1.787925 | -2.811900 |
| C | 0.841683  | -2.691582 | -2.517211 |
| N | -0.428513 | -2.299729 | -2.071568 |
| C | 1.042452  | -4.066010 | -2.695256 |
| C | 2.262362  | -4.557584 | -3.135969 |
| C | 3.301023  | -3.667446 | -3.415765 |
| C | 3.106773  | -2.301634 | -3.256493 |
| C | 2.243681  | 0.629432  | -3.422202 |
| C | 3.189741  | 0.758176  | -4.438110 |
| C | 2.625420  | 0.873318  | -5.856014 |
| O | 4.429012  | 0.883754  | -4.289279 |
| H | 3.904995  | -1.598707 | -3.476182 |
| H | 4.263746  | -4.038136 | -3.758505 |
| H | 2.404423  | -5.628101 | -3.262152 |
| H | 0.211596  | -4.731900 | -2.479326 |

|   |           |           |           |
|---|-----------|-----------|-----------|
| H | -4.443822 | -0.955428 | -2.048554 |
| H | -6.877492 | -0.986683 | -1.668480 |
| H | -7.823295 | -0.085684 | 0.441948  |
| H | -6.307723 | 0.859230  | 2.168079  |
| H | -3.846681 | 0.893668  | 1.766852  |
| H | 3.170108  | 0.176899  | -6.503202 |
| H | 2.802073  | 1.886847  | -6.234650 |
| H | 1.552878  | 0.660050  | -5.901332 |
| H | -2.539577 | -1.749888 | -1.370763 |

Frequencies

|           |           |           |
|-----------|-----------|-----------|
| 17.6500   | 28.9043   | 46.1460   |
| 56.8120   | 63.6795   | 78.1979   |
| 86.1390   | 108.7699  | 111.9519  |
| 127.4851  | 148.0933  | 160.0119  |
| 197.0144  | 245.8296  | 265.1559  |
| 285.2600  | 316.5437  | 357.3275  |
| 368.7245  | 415.8060  | 424.2394  |
| 436.8403  | 453.9828  | 493.2184  |
| 513.5147  | 525.0146  | 545.3147  |
| 572.4650  | 591.2079  | 605.7547  |
| 637.2567  | 646.0386  | 668.4021  |
| 671.5041  | 682.9771  | 691.1323  |
| 710.5428  | 724.8660  | 729.1801  |
| 773.7441  | 789.6205  | 818.5621  |
| 828.9395  | 854.9617  | 880.4577  |
| 903.7715  | 915.9598  | 947.6377  |
| 966.6780  | 979.2364  | 1000.0904 |
| 1013.3404 | 1017.5794 | 1028.5148 |
| 1030.7003 | 1051.1971 | 1068.1247 |
| 1080.5149 | 1118.2764 | 1129.4852 |
| 1153.0554 | 1184.7932 | 1193.7963 |
| 1211.7072 | 1218.3436 | 1248.7362 |
| 1266.5707 | 1297.1303 | 1307.5250 |
| 1319.6833 | 1345.3509 | 1349.6688 |
| 1370.9974 | 1396.6048 | 1497.9905 |
| 1498.4251 | 1502.8509 | 1506.4468 |
| 1533.1701 | 1546.8071 | 1566.7707 |
| 1598.6681 | 1641.1234 | 1654.1160 |
| 1670.5406 | 1689.3938 | 1694.0345 |
| 1790.2942 | 1802.2041 | 3060.3676 |
| 3126.9302 | 3144.8265 | 3189.1502 |
| 3202.8639 | 3206.3143 | 3213.2306 |
| 3219.1732 | 3222.1972 | 3230.8927 |
| 3231.1759 | 3245.3369 | 3621.4826 |

Energy: -1351.43997747

PCM: -1351.75160231



TS-P1-P2

|   |           |           |           |
|---|-----------|-----------|-----------|
| C | -5.070551 | -1.038416 | -0.501386 |
| C | -4.038155 | -0.238823 | 0.007921  |
| C | -4.375012 | 0.756666  | 0.953563  |
| C | -5.711494 | 0.994116  | 1.284139  |
| C | -6.713394 | 0.211663  | 0.735849  |
| C | -6.390776 | -0.824199 | -0.140931 |
| N | -3.396789 | 1.493118  | 1.604704  |
| C | -2.132994 | 1.134747  | 1.706321  |
| S | -1.351695 | -0.118660 | 0.825238  |
| C | -2.637352 | -0.419176 | -0.405966 |
| N | -1.635996 | 1.943363  | 2.661742  |
| C | -0.333434 | 1.925459  | 3.094294  |
| O | 0.462722  | 1.084057  | 2.685726  |
| C | -2.117790 | -0.817364 | -1.590735 |
| C | -2.763679 | -1.069146 | -2.901438 |
| O | -3.962630 | -1.012856 | -3.114098 |
| C | 0.051752  | 2.966229  | 4.090369  |
| C | -0.830990 | 3.959242  | 4.519569  |
| C | -0.416891 | 4.907450  | 5.448444  |
| C | 0.879977  | 4.868404  | 5.953893  |
| C | 1.763944  | 3.879280  | 5.527597  |
| C | 1.351764  | 2.932232  | 4.598945  |
| C | -1.792339 | -1.367803 | -4.024637 |
| H | -4.829661 | -1.826246 | -1.199529 |
| H | -7.169410 | -1.456120 | -0.555108 |
| H | -7.748767 | 0.396873  | 1.005732  |
| H | -5.937659 | 1.782110  | 1.994959  |
| H | -2.943025 | 2.305295  | 2.579237  |
| H | -1.840433 | 3.993331  | 4.125886  |
| H | -1.107217 | 5.678278  | 5.777586  |
| H | 1.202067  | 5.609332  | 6.679848  |
| H | 2.775788  | 3.847097  | 5.920284  |
| H | 2.023278  | 2.154211  | 4.252238  |
| H | -2.346494 | -1.551271 | -4.945750 |
| H | -1.180249 | -2.243867 | -3.780992 |
| H | -1.106514 | -0.525668 | -4.172459 |
| H | -1.032084 | -0.871150 | -1.638937 |

Frequencies

|            |          |          |
|------------|----------|----------|
| i1974.6740 | 19.1448  | 25.3896  |
| 28.5114    | 48.3357  | 60.5996  |
| 75.6812    | 97.7812  | 116.7980 |
| 132.1251   | 153.8675 | 163.8872 |
| 195.9133   | 199.2135 | 225.2378 |
| 263.4857   | 285.8579 | 295.3608 |
| 332.1701   | 385.7778 | 410.7165 |
| 422.7406   | 455.5144 | 456.9557 |
| 487.7082   | 523.1611 | 531.0379 |
| 556.4711   | 576.1367 | 585.4463 |
| 626.8972   | 637.4685 | 642.6862 |
| 694.7892   | 709.5495 | 715.1997 |

|           |           |           |
|-----------|-----------|-----------|
| 730.5552  | 742.6695  | 764.3517  |
| 777.3942  | 785.0957  | 833.3561  |
| 854.2471  | 880.0639  | 881.3105  |
| 884.0079  | 897.4616  | 974.5772  |
| 976.0407  | 986.0107  | 995.4894  |
| 1016.6623 | 1018.9692 | 1019.5340 |
| 1031.9698 | 1037.8851 | 1060.5599 |
| 1066.3882 | 1069.2627 | 1088.8526 |
| 1120.2329 | 1141.6247 | 1183.4541 |
| 1195.6950 | 1196.8767 | 1214.7494 |
| 1218.1350 | 1232.6885 | 1309.0568 |
| 1325.1835 | 1336.9180 | 1351.0812 |
| 1368.0854 | 1369.9435 | 1420.5500 |
| 1439.5116 | 1467.9017 | 1496.8501 |
| 1504.2374 | 1504.6920 | 1510.5589 |
| 1545.4309 | 1557.2474 | 1598.0264 |
| 1641.9399 | 1656.9236 | 1668.9486 |
| 1693.4117 | 1694.3260 | 1737.2891 |
| 1805.4720 | 2075.9250 | 3074.9399 |
| 3135.7296 | 3184.5418 | 3194.8441 |
| 3211.2400 | 3218.8000 | 3222.6135 |
| 3233.0008 | 3234.0479 | 3241.9142 |
| 3249.2654 | 3250.6973 | 3296.2433 |

Energy: -1351.95504641

PCM: -1352.19077085

P1f

|   |           |           |           |
|---|-----------|-----------|-----------|
| C | 0.015586  | -0.182927 | 1.332799  |
| C | 1.365756  | -0.349917 | 1.689226  |
| H | 1.628842  | -0.494340 | 2.730285  |
| C | 2.371418  | -0.366486 | 0.740763  |
| H | 3.402649  | -0.504476 | 1.050207  |
| C | 2.051994  | -0.215749 | -0.611603 |
| H | 2.834900  | -0.222001 | -1.363920 |
| C | 0.730976  | -0.078613 | -0.988576 |
| H | 0.446819  | 0.020575  | -2.030773 |
| C | -0.298901 | -0.078623 | -0.034816 |
| N | -1.586403 | 0.016979  | -0.541008 |
| C | -2.621598 | -0.168690 | 0.187376  |
| S | -2.723391 | -0.428833 | 1.934356  |
| C | -1.029151 | -0.113753 | 2.368537  |
| N | -3.831759 | -0.103898 | -0.503323 |
| H | -3.685528 | 0.076255  | -1.488979 |
| C | -5.107167 | -0.382672 | -0.056071 |
| O | -5.321796 | -0.815781 | 1.061744  |
| C | -6.204401 | -0.135853 | -1.042642 |
| C | -7.401521 | -0.827457 | -0.847682 |

|   |           |           |           |
|---|-----------|-----------|-----------|
| H | -7.479366 | -1.503164 | -0.002682 |
| C | -8.465182 | -0.643432 | -1.721416 |
| H | -9.390363 | -1.190485 | -1.568277 |
| C | -8.346122 | 0.243861  | -2.788879 |
| H | -9.179289 | 0.390764  | -3.469694 |
| C | -7.161540 | 0.949732  | -2.977367 |
| H | -7.071042 | 1.655820  | -3.797033 |
| C | -6.091966 | 0.760185  | -2.108521 |
| H | -5.187995 | 1.345127  | -2.252022 |
| C | -0.732243 | 0.151108  | 3.667443  |
| H | 0.293033  | 0.390816  | 3.923630  |
| C | -1.698139 | 0.179709  | 4.763581  |
| O | -2.859411 | -0.182462 | 4.613556  |
| C | -1.200922 | 0.679142  | 6.101834  |
| H | -2.013084 | 0.643588  | 6.829121  |
| H | -0.831086 | 1.707174  | 6.015384  |
| H | -0.367148 | 0.062101  | 6.456013  |

Frequencies

|           |           |           |
|-----------|-----------|-----------|
| 19.0690   | 29.9968   | 47.4503   |
| 50.7289   | 68.1395   | 78.3830   |
| 88.0477   | 113.8284  | 114.9194  |
| 133.8294  | 163.1008  | 183.8158  |
| 214.9881  | 227.1476  | 264.5010  |
| 297.6617  | 319.1234  | 325.7034  |
| 391.1071  | 411.3595  | 421.8222  |
| 432.3630  | 459.3781  | 495.0398  |
| 524.7864  | 538.5390  | 555.6379  |
| 590.2666  | 603.4928  | 622.2200  |
| 637.0285  | 650.9363  | 675.2824  |
| 677.0990  | 682.2962  | 708.1510  |
| 714.8123  | 725.9623  | 729.9013  |
| 771.4443  | 788.6356  | 821.5738  |
| 848.7309  | 854.6588  | 879.4098  |
| 902.4681  | 908.6944  | 954.5083  |
| 969.3345  | 987.4087  | 996.0989  |
| 1015.6266 | 1021.6586 | 1024.1278 |
| 1030.0668 | 1038.1037 | 1062.4559 |
| 1068.8768 | 1088.5627 | 1119.3073 |
| 1138.0284 | 1158.3826 | 1197.9960 |
| 1198.6086 | 1222.9752 | 1226.6065 |
| 1267.0715 | 1278.2170 | 1294.1275 |
| 1305.2762 | 1333.4535 | 1352.7457 |
| 1354.1456 | 1374.9852 | 1383.6151 |
| 1424.4929 | 1496.3580 | 1503.3665 |
| 1505.4940 | 1510.7147 | 1536.0532 |
| 1551.8803 | 1569.9850 | 1603.7411 |
| 1646.4329 | 1671.4563 | 1679.5933 |
| 1693.7819 | 1701.6867 | 1775.9189 |
| 1801.2283 | 3074.9345 | 3135.4186 |
| 3191.1344 | 3211.2589 | 3216.8152 |

|           |           |           |
|-----------|-----------|-----------|
| 3218.6678 | 3228.9952 | 3229.0577 |
| 3235.9672 | 3238.3289 | 3243.7350 |
| 3249.6022 | 3253.8453 | 3626.7173 |

Energy: -1352.02820062

PCM: -1352.26845759

R1-

|   |           |           |           |
|---|-----------|-----------|-----------|
| C | -3.624091 | -0.457459 | -0.026528 |
| C | -2.801230 | -1.539947 | 0.028341  |
| C | -1.379139 | -1.402899 | 0.039891  |
| C | -0.851426 | -0.138861 | -0.006415 |
| C | -1.665163 | 1.025533  | -0.064708 |
| C | -3.129953 | 0.911802  | -0.077467 |
| C | -1.056876 | 2.276178  | -0.109741 |
| C | -0.534317 | 3.388168  | -0.147130 |
| C | 0.149924  | 4.623724  | -0.190406 |
| O | -0.395575 | 5.729102  | -0.260872 |
| N | -3.994896 | 1.888560  | -0.128627 |
| C | 1.669371  | 4.541936  | -0.108615 |
| H | -4.704883 | -0.570821 | -0.034799 |
| H | -3.236575 | -2.538151 | 0.064608  |
| H | -0.737747 | -2.278438 | 0.084335  |
| H | 0.227719  | 0.002806  | 0.001024  |
| H | 2.055041  | 3.620026  | -0.552416 |
| H | 2.102375  | 5.414626  | -0.605086 |
| H | 1.970332  | 4.560818  | 0.945911  |
| H | -3.504827 | 2.785124  | -0.160478 |

Frequencies

|           |           |           |
|-----------|-----------|-----------|
| 30.8801   | 58.0817   | 60.4530   |
| 62.4964   | 127.1481  | 160.4888  |
| 218.2641  | 291.6554  | 412.3034  |
| 424.3176  | 492.4363  | 514.2727  |
| 540.8598  | 575.7484  | 588.7498  |
| 605.3636  | 630.0484  | 674.5001  |
| 726.7215  | 737.3962  | 818.7892  |
| 825.9816  | 855.7333  | 907.0381  |
| 957.5260  | 996.3857  | 1000.1761 |
| 1030.9221 | 1051.6427 | 1100.6905 |
| 1167.6601 | 1187.3179 | 1212.8957 |
| 1300.6163 | 1363.0950 | 1387.3220 |
| 1410.9495 | 1458.1605 | 1499.5895 |
| 1504.7233 | 1515.8947 | 1564.8589 |
| 1592.3189 | 1692.6196 | 1709.4795 |
| 2217.3484 | 3069.7392 | 3138.5478 |
| 3164.8587 | 3166.9484 | 3181.2571 |
| 3207.8716 | 3214.2327 | 3470.7089 |

Energy: -515.578028232  
PCM: -515.767349723

TSHB-

|   |           |           |           |
|---|-----------|-----------|-----------|
| C | -2.561638 | 0.335383  | 0.063561  |
| C | -2.698968 | -1.041271 | -0.106535 |
| C | -3.690108 | -1.542789 | -0.954546 |
| C | -4.544730 | -0.671968 | -1.617283 |
| C | -4.405064 | 0.705882  | -1.444451 |
| C | -3.411081 | 1.207881  | -0.609647 |
| C | -1.800284 | -2.011975 | 0.579822  |
| O | -1.790262 | -3.199281 | 0.315330  |
| N | -1.047291 | -1.501445 | 1.631901  |
| C | 0.121177  | -1.233445 | 1.846549  |
| S | 1.407992  | -0.821698 | 2.687309  |
| N | 0.824310  | -1.425750 | -0.409600 |
| C | 2.044959  | -1.036796 | -0.741229 |
| C | 3.077229  | -1.935832 | -1.197599 |
| C | 4.339422  | -1.513471 | -1.520352 |
| C | 4.709289  | -0.151962 | -1.415119 |
| C | 3.759730  | 0.746377  | -0.982829 |
| C | 2.444120  | 0.351327  | -0.649267 |
| C | 1.530386  | 1.350904  | -0.272949 |
| C | 0.784058  | 2.270965  | 0.025765  |
| C | -0.017146 | 3.389878  | 0.378945  |
| C | 0.712059  | 4.720061  | 0.461467  |
| O | -1.224236 | 3.328325  | 0.614338  |
| H | 2.819054  | -2.990165 | -1.276814 |
| H | 5.073912  | -2.243162 | -1.857624 |
| H | 5.713901  | 0.173605  | -1.667770 |
| H | 4.007756  | 1.801415  | -0.893625 |
| H | 1.225350  | 4.934749  | -0.481715 |
| H | -0.005387 | 5.512633  | 0.686325  |
| H | 1.475560  | 4.678836  | 1.245913  |
| H | 0.740281  | -2.434925 | -0.543279 |
| H | -1.780529 | 0.739255  | 0.696051  |
| H | -3.268952 | 2.275307  | -0.476381 |
| H | -5.070112 | 1.387860  | -1.968836 |
| H | -5.317769 | -1.064697 | -2.272804 |
| H | -3.770829 | -2.617326 | -1.082009 |

Frequencies

|           |          |          |
|-----------|----------|----------|
| i213.8730 | 20.8117  | 30.5428  |
| 33.3743   | 43.9836  | 53.9509  |
| 58.5704   | 62.6770  | 72.6240  |
| 78.4009   | 81.0398  | 83.6999  |
| 138.0237  | 156.6146 | 167.0580 |
| 208.0735  | 215.8766 | 256.2355 |

|           |           |           |
|-----------|-----------|-----------|
| 283.6351  | 312.9478  | 384.7787  |
| 414.1562  | 419.9736  | 423.8558  |
| 437.8572  | 478.9953  | 493.4029  |
| 506.4739  | 528.7880  | 547.0183  |
| 581.7140  | 596.9737  | 612.6235  |
| 631.9499  | 634.8032  | 644.1484  |
| 685.8330  | 699.4068  | 712.6682  |
| 734.7671  | 735.5394  | 757.1971  |
| 792.8665  | 822.1536  | 835.2578  |
| 863.2253  | 883.2845  | 886.7464  |
| 909.9250  | 962.5593  | 975.9085  |
| 987.3899  | 993.6806  | 1014.7527 |
| 1029.6097 | 1044.0482 | 1056.0413 |
| 1057.3641 | 1060.4577 | 1115.9820 |
| 1117.7399 | 1145.0530 | 1180.0420 |
| 1188.4006 | 1190.3460 | 1206.8826 |
| 1220.0748 | 1307.8497 | 1314.9844 |
| 1351.2056 | 1358.0753 | 1363.9263 |
| 1392.8274 | 1413.8778 | 1433.2795 |
| 1496.7076 | 1503.1233 | 1506.6095 |
| 1523.3408 | 1540.6474 | 1551.1914 |
| 1588.9981 | 1670.8267 | 1679.4762 |
| 1689.8518 | 1722.5741 | 1769.4529 |
| 2000.2484 | 2257.3371 | 3075.3816 |
| 3141.9257 | 3170.5111 | 3172.3958 |
| 3190.9680 | 3193.2195 | 3195.5000 |
| 3211.3995 | 3219.2641 | 3239.3923 |
| 3243.1761 | 3272.0503 | 3480.8024 |

Energy: -1351.3928098

PCM: -1351.70844910

TS-3B-3B<sub>2</sub>-

|   |           |           |           |
|---|-----------|-----------|-----------|
| C | -5.236168 | -1.027156 | -0.302667 |
| C | -4.147096 | -0.243579 | 0.081144  |
| C | -4.375496 | 0.947667  | 0.771408  |
| C | -5.673754 | 1.349684  | 1.070928  |
| C | -6.756360 | 0.565229  | 0.681357  |
| C | -6.533756 | -0.625694 | -0.006778 |
| C | -2.768246 | -0.740296 | -0.270470 |
| O | -2.620691 | -1.836854 | -0.807544 |
| N | -1.754287 | 0.104482  | 0.036907  |
| C | -0.410248 | -0.096650 | -0.149634 |
| N | 0.096520  | 1.064110  | 0.221873  |
| C | 1.429652  | 1.450453  | 0.084713  |
| C | 2.441596  | 0.512721  | -0.211590 |
| C | 2.189616  | -0.949898 | -0.305489 |
| S | 0.453296  | -1.449947 | -0.723507 |

|   |           |           |           |
|---|-----------|-----------|-----------|
| C | 1.735661  | 2.803892  | 0.248847  |
| C | 3.040418  | 3.256945  | 0.112782  |
| C | 4.050461  | 2.347275  | -0.192850 |
| C | 3.744682  | 1.000691  | -0.348993 |
| C | 3.031241  | -1.948447 | -0.177367 |
| C | 4.376630  | -2.239787 | 0.031137  |
| C | 5.198071  | -2.483446 | -1.240122 |
| O | 4.939787  | -2.422119 | 1.134010  |
| H | 4.533460  | 0.287630  | -0.562108 |
| H | 5.078358  | 2.682222  | -0.301724 |
| H | 3.266046  | 4.311843  | 0.244475  |
| H | 0.926891  | 3.489378  | 0.486673  |
| H | -1.218331 | 1.276448  | 0.389798  |
| H | -3.534197 | 1.557518  | 1.080051  |
| H | -5.839469 | 2.277585  | 1.611543  |
| H | -7.769972 | 0.880102  | 0.915060  |
| H | -7.374007 | -1.243512 | -0.311959 |
| H | -5.036113 | -1.952235 | -0.832903 |
| H | 6.138764  | -1.926851 | -1.160130 |
| H | 4.668184  | -2.190217 | -2.152578 |
| H | 5.449132  | -3.548152 | -1.306460 |

|            |           |           |
|------------|-----------|-----------|
| i1929.8092 | 14.3419   | 21.1987   |
| 40.2983    | 48.9197   | 62.6672   |
| 69.3036    | 83.9588   | 114.0629  |
| 120.3067   | 138.1132  | 146.6285  |
| 156.6622   | 193.9184  | 237.4980  |
| 267.4574   | 290.3004  | 303.5761  |
| 353.7611   | 378.1668  | 419.3959  |
| 424.9583   | 443.7190  | 457.7881  |
| 469.8900   | 488.4516  | 514.6618  |
| 544.7655   | 566.3868  | 586.9638  |
| 599.9751   | 638.3439  | 647.4629  |
| 670.7297   | 697.2312  | 709.2208  |
| 726.5207   | 730.4432  | 743.2044  |
| 769.9903   | 774.5233  | 811.6274  |
| 828.3699   | 865.2121  | 880.7327  |
| 889.7831   | 910.5218  | 967.1129  |
| 970.1929   | 996.1355  | 996.9903  |
| 998.1004   | 1015.6101 | 1030.4217 |
| 1031.5268  | 1047.8275 | 1051.4748 |
| 1067.0573  | 1084.6791 | 1114.4479 |
| 1131.5510  | 1177.2173 | 1184.9615 |
| 1191.0162  | 1201.8002 | 1210.7042 |
| 1276.0231  | 1295.4995 | 1313.2270 |
| 1319.0561  | 1343.7522 | 1353.7313 |
| 1363.2051  | 1396.8311 | 1449.4298 |
| 1495.8329  | 1498.5542 | 1504.3907 |
| 1506.8689  | 1537.6387 | 1554.2531 |
| 1590.0226  | 1610.1465 | 1650.7384 |
| 1666.9224  | 1682.3530 | 1692.4049 |

|           |           |           |
|-----------|-----------|-----------|
| 1735.9195 | 1814.3930 | 2106.1462 |
| 3059.0335 | 3127.6956 | 3138.9824 |
| 3195.0409 | 3197.5571 | 3209.3133 |
| 3210.1004 | 3221.3450 | 3222.4013 |
| 3244.9420 | 3245.9749 | 3249.9110 |

Energy: -1351.3818048  
PCM: -1351.70699985

#### Reaction A

#### R2

|   |          |           |          |
|---|----------|-----------|----------|
| C | 4.668496 | -3.876809 | 3.652956 |
| C | 5.066457 | -4.115309 | 2.336030 |
| C | 6.418172 | -4.252691 | 2.025531 |
| C | 7.369752 | -4.151170 | 3.033659 |
| C | 6.980638 | -3.913463 | 4.349253 |
| C | 5.628488 | -3.777111 | 4.653129 |
| N | 4.134019 | -4.222431 | 1.300658 |
| C | 2.955116 | -4.182936 | 1.074878 |
| O | 1.829782 | -4.164951 | 0.737975 |
| H | 6.707095 | -4.437618 | 0.996488 |
| H | 8.421797 | -4.258784 | 2.787730 |
| H | 7.726668 | -3.834811 | 5.133788 |
| H | 5.315067 | -3.591575 | 5.676043 |
| H | 3.613522 | -3.770825 | 3.887500 |

#### Frequencies

|           |           |           |
|-----------|-----------|-----------|
| 61.0171   | 78.5529   | 248.5325  |
| 389.2560  | 426.9172  | 470.0986  |
| 515.3930  | 584.5372  | 631.6037  |
| 642.2337  | 708.5368  | 780.3632  |
| 782.0118  | 862.9337  | 943.2647  |
| 1002.6343 | 1025.7233 | 1029.9608 |
| 1065.2261 | 1119.0175 | 1168.8002 |
| 1195.5791 | 1214.6930 | 1335.1448 |
| 1370.2796 | 1511.6929 | 1516.5946 |
| 1597.8062 | 1671.5780 | 1693.8495 |
| 2404.8222 | 3213.8123 | 3220.9506 |
| 3229.5180 | 3238.3505 | 3245.7237 |

Energy: -399.540944199  
PCM: -399.638637519

#### TS1

|   |           |          |          |
|---|-----------|----------|----------|
| C | -2.238161 | 1.321692 | 0.074370 |
|---|-----------|----------|----------|



|   |           |           |           |
|---|-----------|-----------|-----------|
| C | -2.699242 | 2.508782  | 0.660789  |
| H | -3.689987 | 2.522658  | 1.102244  |
| C | -1.904427 | 3.643898  | 0.670321  |
| H | -2.272349 | 4.557975  | 1.124634  |
| C | -0.632774 | 3.606337  | 0.099345  |
| H | -0.004121 | 4.490976  | 0.111536  |
| C | -0.154613 | 2.436691  | -0.476922 |
| H | 0.845187  | 2.386927  | -0.897081 |
| C | -0.955962 | 1.301180  | -0.495104 |
| N | -0.426605 | 0.087491  | -1.043669 |
| H | -1.138870 | -0.644257 | -1.089413 |
| H | 0.012540  | 0.222873  | -1.953124 |
| C | -3.057721 | 0.154278  | 0.029008  |
| C | -3.712413 | -0.859529 | -0.062016 |
| C | -4.472920 | -2.093123 | -0.186145 |
| O | -4.123413 | -2.949257 | -0.976029 |
| C | -5.699437 | -2.221543 | 0.677817  |
| H | -6.493577 | -1.589601 | 0.261271  |
| H | -5.507040 | -1.875926 | 1.697320  |
| H | -6.035266 | -3.259573 | 0.677729  |
| C | 0.934206  | -0.550654 | -0.049689 |
| O | 0.483940  | -1.090247 | 0.924542  |
| N | 1.950251  | -0.189622 | -0.721856 |
| C | 3.251089  | -0.474738 | -0.250882 |
| C | 4.310731  | -0.052482 | -1.061891 |
| C | 5.627776  | -0.277817 | -0.684134 |
| C | 5.913058  | -0.930636 | 0.513607  |
| C | 4.863360  | -1.354425 | 1.322894  |
| C | 3.540098  | -1.132550 | 0.951585  |
| H | 4.076381  | 0.453382  | -1.993505 |
| H | 6.435916  | 0.057153  | -1.328530 |
| H | 6.942224  | -1.108274 | 0.811172  |
| H | 5.071841  | -1.866344 | 2.258374  |
| H | 2.731490  | -1.469179 | 1.590221  |

#### Frequencies

|           |          |          |
|-----------|----------|----------|
| i131.8069 | 15.1961  | 16.6898  |
| 28.0170   | 37.6348  | 45.4045  |
| 62.9836   | 74.5269  | 95.7235  |
| 108.1196  | 122.4818 | 168.4488 |
| 188.8019  | 252.2906 | 266.3024 |
| 289.8994  | 303.5762 | 364.7108 |
| 398.8317  | 408.1957 | 430.8276 |
| 494.2824  | 501.5709 | 510.0251 |
| 524.9445  | 551.0329 | 578.5578 |
| 589.8459  | 610.1613 | 629.6288 |
| 636.4117  | 680.4078 | 697.2831 |
| 716.0578  | 732.2560 | 773.6734 |
| 789.2275  | 792.0371 | 803.2661 |
| 834.8172  | 867.7860 | 872.4065 |
| 894.1136  | 914.6627 | 944.0102 |

|           |           |           |
|-----------|-----------|-----------|
| 995.7370  | 1002.5609 | 1007.9255 |
| 1019.6064 | 1026.7066 | 1031.2319 |
| 1061.7195 | 1067.5564 | 1079.8997 |
| 1119.1188 | 1121.1318 | 1138.0118 |
| 1169.7859 | 1191.6446 | 1199.7365 |
| 1203.5261 | 1212.6988 | 1217.9866 |
| 1261.4049 | 1332.4759 | 1334.6341 |
| 1335.7762 | 1370.7058 | 1373.3561 |
| 1388.3515 | 1426.0483 | 1493.1940 |
| 1498.9103 | 1511.5712 | 1518.7051 |
| 1557.6760 | 1563.1904 | 1657.4949 |
| 1663.5423 | 1677.1265 | 1688.2396 |
| 1698.2040 | 1794.2648 | 1982.0231 |
| 2347.9181 | 3079.1210 | 3149.1606 |
| 3196.4677 | 3203.2848 | 3211.5940 |
| 3224.3951 | 3225.2234 | 3233.0053 |
| 3233.5772 | 3241.2418 | 3248.6935 |
| 3250.8029 | 3480.6568 | 3579.5370 |

Energy: -915.6641747  
PCM: -915.897940566

2A

|   |           |           |           |
|---|-----------|-----------|-----------|
| C | -0.207228 | 2.483904  | -0.431591 |
| C | -0.965065 | 1.323484  | -0.439029 |
| C | -2.276621 | 1.305319  | 0.051425  |
| C | -2.818072 | 2.495229  | 0.555526  |
| C | -2.067845 | 3.661544  | 0.558671  |
| C | -0.764915 | 3.656372  | 0.064398  |
| N | -0.356019 | 0.097752  | -0.925771 |
| C | 0.882998  | -0.383755 | -0.035271 |
| O | 0.526761  | -0.812184 | 1.050562  |
| C | -3.038990 | 0.098994  | 0.011600  |
| C | -3.637652 | -0.948719 | -0.075977 |
| C | -4.325940 | -2.227041 | -0.197128 |
| O | -3.896474 | -3.076932 | -0.952372 |
| N | 1.930167  | -0.154526 | -0.751932 |
| C | 3.216685  | -0.448399 | -0.263690 |
| C | 3.503185  | -0.980528 | 1.002355  |
| C | 4.823036  | -1.223243 | 1.374385  |
| C | 5.875259  | -0.946009 | 0.507208  |
| C | 5.595333  | -0.418358 | -0.752338 |
| C | 4.282729  | -0.173337 | -1.131384 |
| C | -5.555135 | -2.413878 | 0.649969  |
| H | -3.832179 | 2.487491  | 0.939974  |
| H | -2.497889 | 4.577318  | 0.950885  |
| H | -0.174573 | 4.566793  | 0.073299  |
| H | 0.816002  | 2.454169  | -0.793138 |
| H | -1.047347 | -0.660089 | -0.931473 |

|   |           |           |           |
|---|-----------|-----------|-----------|
| H | 0.034547  | 0.212298  | -1.864526 |
| H | -6.288713 | -1.630559 | 0.431092  |
| H | -5.293405 | -2.328576 | 1.710226  |
| H | -5.986141 | -3.396244 | 0.451382  |
| H | 4.053336  | 0.235023  | -2.111112 |
| H | 6.404381  | -0.197871 | -1.443535 |
| H | 6.901015  | -1.139806 | 0.807020  |
| H | 5.026824  | -1.636586 | 2.358664  |
| H | 2.692243  | -1.202491 | 1.684874  |

#### Frequencies

|           |           |           |
|-----------|-----------|-----------|
| 10.2300   | 14.8483   | 27.6345   |
| 37.2681   | 44.1433   | 64.3074   |
| 77.8749   | 108.2159  | 113.2796  |
| 124.5552  | 151.1106  | 175.4128  |
| 243.9604  | 263.3600  | 278.2813  |
| 306.8697  | 366.7072  | 384.8453  |
| 404.0222  | 431.1772  | 457.7961  |
| 492.5630  | 510.5789  | 528.9905  |
| 561.9177  | 568.0298  | 584.6631  |
| 603.4761  | 609.3969  | 629.6947  |
| 636.7571  | 688.1658  | 716.7548  |
| 723.5742  | 772.4015  | 786.9185  |
| 792.5342  | 796.3758  | 834.1072  |
| 867.6354  | 870.1204  | 890.6550  |
| 919.7554  | 946.6293  | 955.2290  |
| 1001.4274 | 1003.5448 | 1003.9895 |
| 1019.9669 | 1025.7118 | 1035.4589 |
| 1063.0239 | 1067.7706 | 1080.4215 |
| 1118.6356 | 1127.5942 | 1174.4253 |
| 1190.6905 | 1202.2802 | 1208.2735 |
| 1216.1611 | 1222.1551 | 1250.3368 |
| 1280.5791 | 1328.0361 | 1334.0022 |
| 1335.9032 | 1370.0241 | 1380.2182 |
| 1401.2593 | 1427.0111 | 1491.1732 |
| 1497.6943 | 1510.4559 | 1518.5755 |
| 1557.1475 | 1563.7670 | 1654.0925 |
| 1660.2324 | 1672.2767 | 1687.5374 |
| 1700.9721 | 1798.8508 | 1872.4569 |
| 2351.8457 | 3082.2301 | 3147.6120 |
| 3195.3500 | 3199.9153 | 3208.1562 |
| 3222.1423 | 3226.8503 | 3230.3432 |
| 3235.2626 | 3243.6110 | 3250.4658 |
| 3263.3206 | 3436.2104 | 3518.4823 |

Energy: -915.662839364

PCM: -915.901439364

|   |           |           |           |
|---|-----------|-----------|-----------|
| C | 0.581400  | -0.407711 | -0.038496 |
| C | 0.410460  | -0.049815 | 1.310469  |
| H | 1.237126  | -0.222260 | 1.995222  |
| C | -0.779698 | 0.478770  | 1.783651  |
| H | -0.870767 | 0.731224  | 2.837268  |
| C | -1.861384 | 0.662458  | 0.921692  |
| H | -2.802817 | 1.061772  | 1.286869  |
| C | -1.708059 | 0.339423  | -0.417476 |
| H | -2.522124 | 0.500456  | -1.117703 |
| C | -0.503325 | -0.175080 | -0.920535 |
| C | -0.388060 | -0.348909 | -2.329877 |
| C | -0.355692 | -0.394200 | -3.540061 |
| C | -0.196619 | -0.640878 | -4.952107 |
| O | -1.013065 | -0.262839 | -5.781789 |
| C | 1.042186  | -1.414335 | -5.329028 |
| H | 1.935476  | -0.914344 | -4.940525 |
| H | 1.015275  | -2.404833 | -4.861666 |
| H | 1.098192  | -1.508334 | -6.415740 |
| N | 1.810808  | -0.880618 | -0.457098 |
| H | 2.587641  | -0.660811 | 0.152398  |
| C | 2.108753  | -2.095827 | -1.186397 |
| O | 3.332413  | -2.325970 | -1.281826 |
| N | 1.037838  | -2.751594 | -1.587542 |
| C | 1.130958  | -3.889813 | -2.360144 |
| C | -0.092374 | -4.512498 | -2.703018 |
| C | -0.143777 | -5.650312 | -3.493934 |
| C | 1.028898  | -6.227758 | -3.986722 |
| C | 2.245233  | -5.631326 | -3.660311 |
| C | 2.310126  | -4.489842 | -2.865252 |
| H | -1.003416 | -4.058539 | -2.323144 |
| H | -1.109821 | -6.091531 | -3.732855 |
| H | 0.993006  | -7.118937 | -4.608546 |
| H | 3.173288  | -6.063806 | -4.031389 |
| H | 3.262584  | -4.042108 | -2.614249 |

#### Frequencies

|          |          |          |
|----------|----------|----------|
| 22.8901  | 30.3715  | 36.2488  |
| 47.4333  | 54.7425  | 73.1339  |
| 81.6036  | 118.4366 | 126.2983 |
| 141.3637 | 164.3917 | 188.6300 |
| 241.8649 | 262.3923 | 279.7383 |
| 341.6611 | 374.0407 | 403.0266 |
| 414.8524 | 435.9534 | 477.0970 |
| 492.7077 | 534.5828 | 540.6269 |
| 560.2520 | 573.4616 | 587.5260 |
| 611.7019 | 623.4874 | 634.1685 |
| 659.8106 | 704.2214 | 714.1049 |
| 717.8162 | 762.9178 | 770.9502 |
| 776.8399 | 793.2621 | 856.0487 |
| 862.1561 | 875.2193 | 887.0058 |

|           |           |           |
|-----------|-----------|-----------|
| 919.9101  | 928.3308  | 971.0326  |
| 990.8900  | 996.0711  | 1005.1604 |
| 1006.3776 | 1008.7433 | 1022.7107 |
| 1060.1810 | 1063.2695 | 1086.9087 |
| 1110.4115 | 1145.3736 | 1180.8017 |
| 1192.7934 | 1198.6070 | 1203.3427 |
| 1257.0899 | 1279.0108 | 1299.0043 |
| 1323.3162 | 1338.7136 | 1362.1765 |
| 1368.6023 | 1420.7451 | 1427.3684 |
| 1451.5172 | 1491.1690 | 1495.2738 |
| 1502.9761 | 1517.4093 | 1549.1050 |
| 1560.5215 | 1634.2494 | 1648.3208 |
| 1661.5198 | 1683.3872 | 1716.7317 |
| 1762.5360 | 2337.8372 | 3079.6697 |
| 3148.4269 | 3170.0156 | 3178.7636 |
| 3178.8113 | 3191.4125 | 3203.3720 |
| 3206.7275 | 3216.3235 | 3217.6814 |
| 3230.9791 | 3270.8622 | 3626.7797 |

Energy: -915.167382714

PCM: -915.4447123

TSo

|   |           |           |           |
|---|-----------|-----------|-----------|
| C | 5.456559  | -4.905431 | 0.458006  |
| H | 4.775266  | -5.422525 | -0.223314 |
| H | 5.986064  | -5.627427 | 1.086908  |
| H | 4.873783  | -4.253824 | 1.119320  |
| C | 6.419008  | -4.040988 | -0.348641 |
| O | 6.127441  | -3.715495 | -1.503689 |
| C | 7.616043  | -3.684583 | 0.315716  |
| C | 8.190012  | -2.940419 | 1.150599  |
| C | 9.446558  | -2.739937 | 1.847097  |
| C | 10.363287 | -3.796051 | 1.901973  |
| H | 10.067701 | -4.737495 | 1.450257  |
| C | 11.614627 | -3.652692 | 2.487127  |
| H | 12.306074 | -4.490169 | 2.507325  |
| C | 11.969618 | -2.423970 | 3.041905  |
| H | 12.944109 | -2.288255 | 3.503854  |
| C | 11.071484 | -1.367437 | 3.014455  |
| H | 11.340923 | -0.409414 | 3.453498  |
| C | 9.807700  | -1.507428 | 2.424437  |
| N | 8.950314  | -0.422735 | 2.394454  |
| H | 9.252180  | 0.441697  | 2.820606  |
| C | 7.560464  | -0.513444 | 2.262390  |
| O | 7.097706  | -1.646524 | 1.876116  |
| N | 6.927559  | 0.581598  | 2.583447  |
| C | 5.553952  | 0.735039  | 2.452428  |
| C | 4.998350  | 1.874099  | 3.068944  |
| H | 5.674196  | 2.527409  | 3.613640  |

|   |          |           |          |
|---|----------|-----------|----------|
| C | 3.643355 | 2.162311  | 2.988488 |
| H | 3.254249 | 3.050770  | 3.481982 |
| C | 2.784032 | 1.324549  | 2.277080 |
| H | 1.722195 | 1.546767  | 2.207829 |
| C | 3.317567 | 0.198519  | 1.654199 |
| H | 2.667637 | -0.465433 | 1.088206 |
| C | 4.673838 | -0.102766 | 1.736337 |
| H | 5.065823 | -0.985164 | 1.248720 |

Frequency:

|           |           |           |
|-----------|-----------|-----------|
| i256.9845 | 18.6714   | 29.1094   |
| 29.9020   | 43.0498   | 56.9309   |
| 68.0936   | 87.3101   | 101.9752  |
| 119.4436  | 153.5096  | 225.5705  |
| 241.6432  | 261.2049  | 296.5426  |
| 342.5091  | 371.8197  | 405.6309  |
| 432.4255  | 441.7993  | 484.0857  |
| 504.9002  | 521.9612  | 541.5531  |
| 566.7784  | 577.3969  | 586.6200  |
| 609.5289  | 635.2729  | 649.7990  |
| 663.8187  | 714.2795  | 722.5488  |
| 752.4757  | 760.0301  | 765.7205  |
| 782.4841  | 815.9374  | 834.1052  |
| 861.5871  | 872.7844  | 875.7964  |
| 926.6321  | 931.4957  | 963.7590  |
| 990.3160  | 991.5277  | 997.8359  |
| 1007.8344 | 1017.8338 | 1042.3827 |
| 1054.4589 | 1066.3502 | 1087.1702 |
| 1115.7659 | 1146.2198 | 1183.2564 |
| 1190.2401 | 1200.4403 | 1208.5082 |
| 1264.7549 | 1294.1813 | 1304.5923 |
| 1325.3697 | 1331.1328 | 1363.5893 |
| 1367.1296 | 1405.7503 | 1428.6935 |
| 1461.1769 | 1497.9657 | 1502.6354 |
| 1505.1937 | 1532.2449 | 1559.0203 |
| 1569.2771 | 1638.9084 | 1645.4861 |
| 1667.5204 | 1685.1907 | 1694.7617 |
| 1709.9207 | 2028.2084 | 3071.3788 |
| 3141.3720 | 3161.7832 | 3178.2800 |
| 3187.5671 | 3189.7041 | 3202.5475 |
| 3208.5306 | 3217.5503 | 3218.1009 |
| 3235.7039 | 3276.7124 | 3654.4493 |

Energy: -915.1532732  
PCM: -915.427097569

TSN

|   |          |           |           |
|---|----------|-----------|-----------|
| C | 2.511483 | -1.662330 | -0.435932 |
| C | 1.542491 | -0.996901 | 0.340933  |

|   |           |           |           |
|---|-----------|-----------|-----------|
| C | 2.000413  | -0.214371 | 1.417350  |
| C | 3.352908  | -0.104737 | 1.712640  |
| C | 4.302120  | -0.770883 | 0.938720  |
| C | 3.863603  | -1.546924 | -0.133410 |
| N | 0.178167  | -1.009569 | 0.105255  |
| C | -0.417215 | -1.980201 | -0.583898 |
| O | 0.021127  | -3.055145 | -1.026408 |
| N | -1.800746 | -1.741502 | -0.797105 |
| C | -2.573448 | -0.762367 | -0.200103 |
| C | -2.050238 | 0.508214  | 0.116138  |
| C | -2.892161 | 1.457342  | 0.705596  |
| C | -4.230994 | 1.191179  | 0.965557  |
| C | -4.749925 | -0.056942 | 0.627416  |
| C | -3.927798 | -1.019299 | 0.059243  |
| C | -0.702345 | 0.901276  | -0.231631 |
| C | 0.085551  | 1.781955  | -0.597202 |
| C | 1.168063  | 2.609723  | -0.973364 |
| C | 1.959793  | 3.248858  | 0.157643  |
| O | 1.485471  | 2.839881  | -2.143134 |
| H | -2.469871 | 2.429638  | 0.940037  |
| H | -4.860796 | 1.950018  | 1.420928  |
| H | -5.794991 | -0.288531 | 0.817201  |
| H | -4.328430 | -1.999531 | -0.189461 |
| H | 2.880332  | 2.673263  | 0.301025  |
| H | 1.409132  | 3.252667  | 1.102291  |
| H | 2.230526  | 4.269410  | -0.129040 |
| H | -2.274704 | -2.578447 | -1.106791 |
| H | 1.259324  | 0.303819  | 2.018518  |
| H | 3.668801  | 0.506342  | 2.555932  |
| H | 5.361853  | -0.686738 | 1.166107  |
| H | 4.588610  | -2.073443 | -0.750834 |
| H | 2.181679  | -2.280403 | -1.260811 |

#### Frequencies

|           |           |           |
|-----------|-----------|-----------|
| i204.9054 | 26.6801   | 31.0458   |
| 51.8947   | 68.1408   | 74.4104   |
| 85.1723   | 88.7241   | 91.5824   |
| 137.2732  | 157.5684  | 211.9805  |
| 249.7220  | 256.0879  | 286.4512  |
| 341.6910  | 372.7124  | 400.2493  |
| 423.9568  | 430.8948  | 467.9504  |
| 508.0306  | 530.8283  | 537.9179  |
| 549.1539  | 569.8529  | 584.3968  |
| 598.0296  | 635.0011  | 644.5331  |
| 666.7921  | 705.4582  | 711.4653  |
| 729.6209  | 759.1212  | 767.0736  |
| 768.1746  | 787.9895  | 855.8846  |
| 858.5553  | 873.4290  | 883.9244  |
| 925.5961  | 932.1474  | 961.8473  |
| 988.0497  | 990.7665  | 1001.7693 |
| 1013.3433 | 1019.8794 | 1041.0279 |

|           |           |           |
|-----------|-----------|-----------|
| 1056.0179 | 1067.2047 | 1088.1851 |
| 1115.3600 | 1144.3305 | 1183.4874 |
| 1190.7582 | 1199.2692 | 1206.4869 |
| 1270.2227 | 1284.8248 | 1308.7473 |
| 1332.2004 | 1339.0935 | 1364.2169 |
| 1368.7523 | 1411.2614 | 1431.9014 |
| 1451.1072 | 1499.5879 | 1502.4919 |
| 1505.3508 | 1525.4995 | 1555.7655 |
| 1565.1589 | 1647.9752 | 1663.2060 |
| 1671.7771 | 1683.6725 | 1699.1209 |
| 1728.9854 | 2153.4080 | 3076.3117 |
| 3150.5120 | 3161.7137 | 3177.3287 |
| 3186.5885 | 3186.7144 | 3201.6483 |
| 3208.1397 | 3215.1530 | 3223.2107 |
| 3230.5217 | 3268.5431 | 3646.5062 |

Energy: -915.1582631

PCM: -915.434810803

O1-

|   |           |           |           |
|---|-----------|-----------|-----------|
| C | 0.110049  | -0.292197 | 0.671006  |
| C | 1.403738  | -0.246222 | 1.225699  |
| C | 1.510084  | -0.044479 | 2.614405  |
| C | 0.388841  | 0.114978  | 3.416018  |
| C | -0.887401 | 0.072503  | 2.855228  |
| C | -1.009471 | -0.132888 | 1.483894  |
| N | 2.616317  | -0.402619 | 0.553666  |
| C | 2.755536  | -0.449910 | -0.726519 |
| N | 4.042990  | -0.577554 | -1.209934 |
| C | 4.333562  | -0.935314 | -2.526485 |
| C | 3.327290  | -0.777659 | -3.489317 |
| C | 2.018449  | -0.246703 | -3.096863 |
| O | 1.787780  | -0.390788 | -1.619806 |
| C | 5.599476  | -1.401230 | -2.880116 |
| C | 5.879077  | -1.712415 | -4.206747 |
| C | 4.888186  | -1.564357 | -5.176128 |
| C | 3.626375  | -1.105384 | -4.812260 |
| C | 1.059610  | 0.241978  | -3.838312 |
| C | -0.218607 | 0.754417  | -3.540715 |
| C | -0.297982 | 2.263002  | -3.300410 |
| O | -1.281261 | 0.105726  | -3.543674 |
| H | 2.838331  | -0.975744 | -5.547163 |
| H | 5.096686  | -1.809335 | -6.214024 |
| H | 6.867594  | -2.073355 | -4.478282 |
| H | 6.364051  | -1.511363 | -2.113861 |
| H | -0.929554 | 2.719800  | -4.070824 |
| H | -0.779696 | 2.431325  | -2.331084 |
| H | 0.684695  | 2.743597  | -3.308645 |



|   |           |           |           |
|---|-----------|-----------|-----------|
| H | 2.508215  | -0.016576 | 3.041727  |
| H | 0.511352  | 0.272320  | 4.485447  |
| H | -1.770299 | 0.196715  | 3.476887  |
| H | -1.994184 | -0.170071 | 1.024701  |
| H | -0.020090 | -0.447557 | -0.391088 |
| H | 4.733189  | -0.721669 | -0.487440 |

Frequencies

|           |           |           |
|-----------|-----------|-----------|
| 24.7827   | 30.0354   | 41.4817   |
| 49.8082   | 68.7232   | 84.1773   |
| 97.1337   | 106.9924  | 118.4737  |
| 161.6152  | 209.6253  | 247.7198  |
| 272.7314  | 287.6823  | 300.7679  |
| 399.7095  | 422.4372  | 432.3441  |
| 457.1907  | 496.4560  | 520.8063  |
| 522.7673  | 535.3533  | 544.7169  |
| 557.0306  | 587.2108  | 625.3446  |
| 635.8308  | 649.2933  | 662.3543  |
| 676.2131  | 715.5365  | 734.8763  |
| 763.7635  | 764.9834  | 784.7189  |
| 803.4268  | 833.8208  | 848.1749  |
| 867.5143  | 875.9561  | 901.1980  |
| 934.3684  | 938.6259  | 957.5666  |
| 994.8503  | 999.0329  | 1002.5878 |
| 1019.9318 | 1020.4955 | 1039.0330 |
| 1055.1526 | 1068.1890 | 1077.5634 |
| 1120.5374 | 1140.9085 | 1185.2142 |
| 1185.5444 | 1207.9990 | 1215.7072 |
| 1265.9919 | 1287.6684 | 1312.0295 |
| 1322.1239 | 1326.6612 | 1358.7930 |
| 1369.0136 | 1397.5445 | 1423.0071 |
| 1468.3252 | 1498.1266 | 1505.3182 |
| 1506.3966 | 1536.6307 | 1557.4779 |
| 1566.2833 | 1647.6916 | 1649.7483 |
| 1669.3643 | 1676.0501 | 1690.0907 |
| 1716.9356 | 1815.0990 | 3064.9689 |
| 3132.9323 | 3150.8758 | 3184.1256 |
| 3184.8007 | 3199.1715 | 3200.0812 |
| 3214.3772 | 3216.8684 | 3222.3482 |
| 3237.0325 | 3285.3927 | 3662.3575 |

Energy: -915.159237243

PCM: -915.434827261

O1

|   |          |           |          |
|---|----------|-----------|----------|
| C | 0.269673 | 0.218380  | 0.877416 |
| C | 1.440839 | -0.367326 | 1.372300 |
| H | 1.493891 | -0.665463 | 2.413260 |

|   |           |           |           |
|---|-----------|-----------|-----------|
| C | 2.542805  | -0.558668 | 0.556108  |
| H | 3.443365  | -1.011272 | 0.956966  |
| C | 2.488115  | -0.158981 | -0.781814 |
| H | 3.346834  | -0.307145 | -1.429328 |
| C | 1.348305  | 0.440095  | -1.289250 |
| H | 1.305443  | 0.762720  | -2.325658 |
| C | 0.241691  | 0.638160  | -0.458142 |
| C | -0.948146 | 0.401973  | 1.676161  |
| C | -1.168826 | -0.185363 | 2.872164  |
| H | -0.391682 | -0.847522 | 3.233317  |
| C | -2.347338 | -0.054855 | 3.741098  |
| O | -3.310888 | 0.652848  | 3.493162  |
| C | -2.301152 | -0.878775 | 5.012333  |
| H | -1.439782 | -0.590059 | 5.625821  |
| H | -3.219507 | -0.723561 | 5.579882  |
| H | -2.191139 | -1.943681 | 4.777317  |
| N | -0.908039 | 1.237648  | -0.933144 |
| N | -2.760672 | 2.523245  | -0.585110 |
| C | -1.915191 | 1.715293  | -0.116033 |
| O | -1.911605 | 1.227400  | 1.162945  |
| C | -3.886556 | 3.093598  | 0.032556  |
| C | -4.548796 | 4.065196  | -0.729767 |
| C | -5.681436 | 4.703147  | -0.243521 |
| C | -6.179313 | 4.374986  | 1.015908  |
| C | -5.528863 | 3.406623  | 1.774337  |
| C | -4.388327 | 2.764962  | 1.298533  |
| H | -4.151782 | 4.304214  | -1.711319 |
| H | -6.178359 | 5.455198  | -0.849965 |
| H | -7.067055 | 4.868683  | 1.400628  |
| H | -5.907107 | 3.138329  | 2.756766  |
| H | -3.906131 | 2.017351  | 1.914109  |
| H | -0.925076 | 1.629651  | -1.864653 |

Frequencies:

|           |           |           |
|-----------|-----------|-----------|
| 19.9299   | 25.5237   | 56.4393   |
| 73.5664   | 83.3637   | 101.6093  |
| 102.3535  | 122.6298  | 130.0101  |
| 172.0064  | 223.4296  | 256.6803  |
| 268.8849  | 296.2248  | 303.3371  |
| 332.9227  | 432.0345  | 432.4824  |
| 454.3524  | 499.2304  | 530.6943  |
| 535.7301  | 537.6349  | 560.2195  |
| 569.2108  | 594.3259  | 633.6035  |
| 652.5909  | 673.6998  | 675.7908  |
| 700.4289  | 719.5887  | 737.3938  |
| 755.4892  | 779.9480  | 795.1699  |
| 799.5506  | 834.8523  | 846.4053  |
| 881.5501  | 882.9395  | 912.9217  |
| 931.8087  | 966.5269  | 977.5079  |
| 986.2330  | 1012.5498 | 1014.8577 |
| 1028.2340 | 1032.7164 | 1044.9681 |

|           |           |           |
|-----------|-----------|-----------|
| 1061.2776 | 1070.1856 | 1085.2230 |
| 1120.2968 | 1130.7800 | 1172.6135 |
| 1191.6153 | 1199.3781 | 1221.5247 |
| 1228.2218 | 1257.3089 | 1286.2310 |
| 1301.7502 | 1320.7149 | 1334.9801 |
| 1363.5203 | 1372.2263 | 1383.9783 |
| 1412.1525 | 1424.0450 | 1479.5385 |
| 1496.6462 | 1505.8160 | 1511.0514 |
| 1552.6526 | 1560.7788 | 1577.4628 |
| 1663.7456 | 1671.6135 | 1677.1043 |
| 1691.0123 | 1703.7477 | 1803.4200 |
| 1821.5858 | 3073.6864 | 3134.3854 |
| 3192.0638 | 3204.0698 | 3213.2210 |
| 3214.7926 | 3226.8551 | 3227.1669 |
| 3234.9042 | 3235.9645 | 3245.5931 |
| 3255.2112 | 3283.1794 | 3652.1892 |

Energy: -915.738965818

PCM: -915.954905702

O2

|   |           |           |           |
|---|-----------|-----------|-----------|
| C | 0.257870  | 0.190387  | 0.833085  |
| C | 1.295121  | -0.670503 | 1.225458  |
| H | 1.246518  | -1.184986 | 2.178302  |
| C | 2.389814  | -0.875636 | 0.408016  |
| H | 3.183932  | -1.544013 | 0.724592  |
| C | 2.469313  | -0.218739 | -0.827383 |
| H | 3.329117  | -0.378816 | -1.471155 |
| C | 1.459047  | 0.631432  | -1.230061 |
| H | 1.497050  | 1.151424  | -2.181385 |
| C | 0.342841  | 0.846631  | -0.407309 |
| C | -0.922774 | 0.445870  | 1.655513  |
| C | -1.163304 | -0.099614 | 2.871150  |
| H | -0.406739 | -0.777324 | 3.244816  |
| C | -2.312722 | 0.103741  | 3.753096  |
| O | -3.262848 | 0.832596  | 3.500669  |
| C | -2.267689 | -0.669290 | 5.056539  |
| H | -1.376309 | -0.398982 | 5.634145  |
| H | -3.161269 | -0.447888 | 5.641511  |
| H | -2.215756 | -1.746844 | 4.862776  |
| N | -0.645004 | 1.704409  | -0.848210 |
| N | -2.646292 | 2.723364  | -0.484886 |
| C | -1.660121 | 1.887647  | -0.078528 |
| O | -1.851414 | 1.314956  | 1.131367  |
| C | -3.871204 | 3.160666  | 0.065976  |
| H | -2.421078 | 3.105471  | -1.394350 |
| C | -4.604345 | 4.057526  | -0.720295 |
| C | -5.822171 | 4.550161  | -0.274167 |

|   |           |          |           |
|---|-----------|----------|-----------|
| C | -6.326475 | 4.155486 | 0.962580  |
| C | -5.592306 | 3.264577 | 1.737511  |
| C | -4.368215 | 2.760330 | 1.305051  |
| H | -4.216848 | 4.370246 | -1.687396 |
| H | -6.376711 | 5.245012 | -0.897914 |
| H | -7.278976 | 4.538674 | 1.315216  |
| H | -5.967107 | 2.943919 | 2.704994  |
| H | -3.825981 | 2.069485 | 1.935552  |

Frequencies

|           |           |           |
|-----------|-----------|-----------|
| 22.3595   | 27.9967   | 48.9939   |
| 68.6185   | 91.4916   | 91.5749   |
| 94.7733   | 134.3522  | 152.0132  |
| 177.7106  | 217.8075  | 239.9692  |
| 264.5830  | 291.7842  | 294.3097  |
| 331.6936  | 428.9377  | 443.5764  |
| 470.4547  | 507.2334  | 525.0701  |
| 538.0678  | 538.8634  | 570.9273  |
| 595.3369  | 626.8338  | 636.1188  |
| 659.1006  | 681.4571  | 683.6751  |
| 719.8573  | 731.9501  | 747.0624  |
| 766.4121  | 785.4494  | 786.6322  |
| 811.2207  | 836.0280  | 842.1768  |
| 871.7686  | 896.7281  | 927.3509  |
| 938.5054  | 955.0867  | 982.5350  |
| 994.5575  | 1006.9031 | 1022.4071 |
| 1026.5972 | 1047.1429 | 1055.8978 |
| 1061.1821 | 1074.7089 | 1081.9752 |
| 1116.6172 | 1141.3427 | 1165.8302 |
| 1196.2379 | 1197.1015 | 1223.6412 |
| 1237.7073 | 1257.3864 | 1287.4978 |
| 1312.6856 | 1340.5170 | 1358.4107 |
| 1370.0765 | 1396.5022 | 1397.4438 |
| 1423.2578 | 1465.6717 | 1488.2069 |
| 1497.1069 | 1506.2871 | 1529.1910 |
| 1543.2434 | 1557.5063 | 1585.7339 |
| 1641.1126 | 1657.6851 | 1681.7314 |
| 1691.7416 | 1697.9542 | 1739.3200 |
| 1793.2500 | 3074.2699 | 3135.1305 |
| 3190.7724 | 3193.3208 | 3214.4542 |
| 3217.5274 | 3224.6547 | 3230.1058 |
| 3237.2216 | 3241.1718 | 3245.6019 |
| 3260.6073 | 3287.5045 | 3633.0494 |

Energy: -915.7488937

PCM: -915.961976099

|   |           |           |           |
|---|-----------|-----------|-----------|
| C | 0.134447  | 0.425414  | 0.814969  |
| C | 1.332522  | 0.055121  | 1.433507  |
| C | 1.373753  | 0.005113  | 2.830417  |
| H | 2.282688  | -0.314721 | 3.328437  |
| C | 0.263371  | 0.341313  | 3.589729  |
| H | 0.312141  | 0.290797  | 4.672415  |
| C | -0.914445 | 0.739389  | 2.955381  |
| H | -1.786473 | 1.008544  | 3.543278  |
| C | -0.983965 | 0.778075  | 1.571929  |
| H | -1.901978 | 1.072824  | 1.071135  |
| N | 0.100389  | 0.445868  | -0.574222 |
| C | 0.979557  | -0.258196 | -1.371174 |
| N | 2.162039  | -0.649670 | -0.742874 |
| C | 2.491389  | -0.216447 | 0.558354  |
| C | 3.759968  | -0.055777 | 1.003201  |
| H | 3.875396  | 0.167239  | 2.058314  |
| C | 5.010228  | -0.011407 | 0.226477  |
| O | 5.040671  | 0.192925  | -0.976594 |
| C | 6.287560  | -0.163275 | 1.024887  |
| H | 7.148007  | -0.034356 | 0.366819  |
| H | 6.331204  | 0.574546  | 1.834044  |
| H | 6.327210  | -1.156316 | 1.487708  |
| O | 0.720020  | -0.501036 | -2.533908 |
| C | 2.943693  | -1.664615 | -1.405115 |
| C | 3.143141  | -2.874200 | -0.747184 |
| C | 3.869452  | -3.887160 | -1.364971 |
| C | 4.378894  | -3.694837 | -2.645753 |
| C | 4.164960  | -2.484823 | -3.300218 |
| C | 3.455006  | -1.463207 | -2.680921 |
| H | 2.726944  | -3.022973 | 0.244819  |
| H | 4.021735  | -4.830852 | -0.849610 |
| H | 4.939998  | -4.486551 | -3.133357 |
| H | 4.564058  | -2.327042 | -4.297442 |
| H | 3.304738  | -0.512622 | -3.174858 |

#### Frequencies

|          |          |          |
|----------|----------|----------|
| 31.0314  | 53.3890  | 60.3196  |
| 71.1185  | 86.8513  | 94.8024  |
| 104.1963 | 133.6747 | 159.9498 |
| 188.2506 | 238.5540 | 262.6189 |
| 276.5236 | 281.2495 | 326.0543 |
| 374.8235 | 407.7790 | 427.0311 |
| 453.5516 | 474.8109 | 522.9092 |
| 541.6829 | 552.5878 | 566.3852 |
| 576.9591 | 591.8349 | 629.6270 |
| 637.1698 | 667.0385 | 685.4560 |
| 710.8098 | 723.0903 | 729.5974 |
| 761.5782 | 769.8006 | 780.5896 |
| 791.8916 | 841.7750 | 858.1064 |
| 863.2343 | 889.4423 | 922.8130 |

|           |           |           |
|-----------|-----------|-----------|
| 947.9370  | 958.9137  | 979.8654  |
| 995.8846  | 999.7618  | 1014.7635 |
| 1022.2297 | 1033.2511 | 1047.3159 |
| 1065.6951 | 1074.7758 | 1090.9888 |
| 1121.2637 | 1154.4439 | 1180.5844 |
| 1194.7174 | 1199.4688 | 1216.5576 |
| 1230.8965 | 1269.0014 | 1293.4583 |
| 1311.6319 | 1325.0227 | 1347.0998 |
| 1361.4534 | 1370.7144 | 1388.4025 |
| 1422.3576 | 1449.1453 | 1468.0775 |
| 1495.5368 | 1505.4507 | 1514.6959 |
| 1555.4273 | 1561.4063 | 1562.8075 |
| 1664.9462 | 1680.0848 | 1686.0418 |
| 1690.6611 | 1703.4371 | 1797.3178 |
| 1819.5089 | 3073.6478 | 3134.1203 |
| 3189.4695 | 3208.5892 | 3211.4779 |
| 3218.2747 | 3222.9818 | 3227.4289 |
| 3228.2345 | 3235.8682 | 3236.5563 |
| 3246.2702 | 3277.3123 | 3645.3139 |

Energy: -915.766208  
PCM: -915.986495040

N1-

|   |           |           |           |
|---|-----------|-----------|-----------|
| C | 0.235596  | -0.314019 | 0.776227  |
| C | 1.341902  | 0.088216  | 1.516600  |
| C | 1.172339  | 0.585336  | 2.806477  |
| C | -0.101622 | 0.693016  | 3.352859  |
| C | -1.211982 | 0.287545  | 2.614924  |
| C | -1.037764 | -0.220412 | 1.330803  |
| N | 2.658210  | -0.015416 | 0.969620  |
| C | 3.263853  | 1.152489  | 0.613498  |
| N | 4.550455  | 1.034965  | 0.110697  |
| C | 5.339709  | -0.110463 | 0.230017  |
| C | 4.703046  | -1.318721 | 0.535917  |
| C | 3.232575  | -1.369197 | 0.717732  |
| C | 5.495418  | -2.463826 | 0.627980  |
| C | 6.869299  | -2.418778 | 0.417043  |
| C | 7.485059  | -1.206327 | 0.110269  |
| C | 6.717445  | -0.050491 | 0.019149  |
| O | 2.754091  | 2.269839  | 0.710139  |
| C | 2.533167  | -2.481455 | 0.696240  |
| C | 1.315275  | -3.127427 | 0.780243  |
| C | 0.932331  | -3.670763 | 2.158448  |
| O | 0.537246  | -3.376702 | -0.178812 |
| H | 4.988691  | -3.396674 | 0.854778  |
| H | 7.458596  | -3.328804 | 0.492209  |
| H | 8.557903  | -1.156807 | -0.057052 |
| H | 7.181357  | 0.903497  | -0.223898 |
| H | -0.040193 | -3.247940 | 2.435747  |

|   |           |           |           |
|---|-----------|-----------|-----------|
| H | 0.819162  | -4.759664 | 2.100522  |
| H | 1.667738  | -3.424734 | 2.931490  |
| H | 2.046827  | 0.896162  | 3.369422  |
| H | -0.226716 | 1.089034  | 4.357466  |
| H | -2.208461 | 0.359661  | 3.043674  |
| H | -1.893169 | -0.561268 | 0.754688  |
| H | 0.373838  | -0.739278 | -0.211363 |
| H | 4.993938  | 1.929121  | -0.041444 |

Frequencies

|           |           |           |
|-----------|-----------|-----------|
| 18.0192   | 34.6033   | 63.5219   |
| 80.8380   | 88.3601   | 95.9813   |
| 101.0989  | 126.4272  | 141.3840  |
| 162.1225  | 224.8909  | 242.8527  |
| 272.0217  | 291.0276  | 364.3255  |
| 385.1621  | 429.6033  | 432.2048  |
| 440.7444  | 461.0854  | 500.1489  |
| 503.7899  | 531.0793  | 534.8602  |
| 566.7615  | 592.2031  | 601.0851  |
| 637.5733  | 652.0644  | 671.7826  |
| 679.6241  | 714.2517  | 728.8186  |
| 759.8700  | 765.6499  | 769.4899  |
| 783.2698  | 850.3222  | 861.7526  |
| 870.6069  | 877.0867  | 923.5887  |
| 945.3152  | 957.9123  | 993.9720  |
| 1001.9284 | 1003.4406 | 1011.7374 |
| 1026.8030 | 1034.7745 | 1053.5512 |
| 1069.4069 | 1080.2327 | 1114.1203 |
| 1136.7352 | 1142.1985 | 1184.4509 |
| 1187.7801 | 1211.7919 | 1223.6882 |
| 1277.0047 | 1294.0709 | 1312.2956 |
| 1319.4352 | 1340.1416 | 1357.0155 |
| 1368.1900 | 1396.8909 | 1449.9164 |
| 1455.8370 | 1497.5842 | 1501.9825 |
| 1509.2192 | 1536.0364 | 1556.4862 |
| 1563.7259 | 1588.7977 | 1673.6933 |
| 1675.7907 | 1686.9669 | 1691.2674 |
| 1753.1387 | 1861.0073 | 3056.9381 |
| 3124.3564 | 3137.8961 | 3181.5502 |
| 3190.4044 | 3197.2313 | 3206.5770 |
| 3214.4123 | 3221.0876 | 3230.1417 |
| 3231.5544 | 3253.9769 | 3661.9281 |

Energy: -915.1822528

PCM: -915.463951044

TS-5-cycle

|   |           |           |           |
|---|-----------|-----------|-----------|
| C | -1.695226 | -3.334292 | -4.460609 |
| C | -2.343411 | -2.217306 | -3.906013 |
| C | -3.620244 | -1.882482 | -4.381573 |
| C | -4.240375 | -2.645879 | -5.361411 |
| C | -3.594145 | -3.752678 | -5.900136 |
| C | -2.318918 | -4.082579 | -5.448007 |
| N | -1.807405 | -1.436380 | -2.885100 |
| C | -0.504651 | -1.382527 | -2.558396 |
| O | 0.521493  | -1.780790 | -3.091480 |
| C | -0.578331 | -0.708792 | -1.207213 |
| C | -1.859276 | -0.696534 | -0.890585 |
| C | -3.314678 | -0.765534 | -0.662542 |
| C | -3.979485 | -2.094521 | -0.891073 |
| C | 0.472313  | -0.209912 | -0.340853 |
| C | -0.005413 | 0.388002  | 0.828202  |
| C | 0.871922  | 0.891725  | 1.773365  |
| C | 2.240917  | 0.798129  | 1.526879  |
| C | 2.718202  | 0.216709  | 0.354097  |
| C | 1.837403  | -0.292322 | -0.593454 |
| N | -1.432668 | 0.375516  | 0.906417  |
| O | -3.915857 | 0.217356  | -0.274872 |
| H | 0.501477  | 1.353713  | 2.683342  |
| H | 2.941233  | 1.188760  | 2.258125  |
| H | 3.787642  | 0.156861  | 0.180895  |
| H | 2.176037  | -0.761530 | -1.510789 |
| H | -1.811414 | 0.058203  | 1.794687  |
| H | -4.104653 | -0.996999 | -3.980615 |
| H | -5.229281 | -2.366523 | -5.713332 |
| H | -4.073535 | -4.347111 | -6.671615 |
| H | -1.800253 | -4.938106 | -5.871461 |
| H | -0.695759 | -3.581535 | -4.126017 |
| H | -3.289346 | -2.924725 | -0.727412 |
| H | -4.840835 | -2.166581 | -0.223973 |
| H | -4.326829 | -2.162339 | -1.926189 |
| H | -1.896897 | 1.243906  | 0.646795  |

Energy (PCM)=-915.852862

|           |          |          |
|-----------|----------|----------|
| -522.2564 | 32.4091  | 44.7121  |
| 47.2968   | 58.8314  | 94.2364  |
| 109.0321  | 115.0136 | 138.6244 |
| 160.9563  | 183.7244 | 194.0908 |
| 214.8582  | 241.4551 | 293.4140 |
| 315.8867  | 338.6256 | 381.8721 |
| 400.8102  | 429.5346 | 447.3251 |
| 457.5692  | 496.4281 | 528.7283 |
| 540.6902  | 552.9955 | 582.5612 |
| 582.8895  | 605.1262 | 636.2165 |
| 639.6010  | 682.1977 | 722.1417 |



|           |           |           |
|-----------|-----------|-----------|
| 740.5202  | 764.5256  | 788.3445  |
| 799.0685  | 804.3731  | 849.7124  |
| 860.2454  | 872.8372  | 888.9703  |
| 915.8439  | 919.7484  | 946.4436  |
| 993.4679  | 994.7539  | 1013.6642 |
| 1021.1900 | 1026.2722 | 1038.3366 |
| 1050.5788 | 1064.3777 | 1069.4971 |
| 1072.5721 | 1123.3888 | 1144.2694 |
| 1161.8394 | 1194.1368 | 1197.7644 |
| 1206.1227 | 1215.8217 | 1237.3766 |
| 1279.9082 | 1327.3117 | 1335.3969 |
| 1350.7895 | 1372.8946 | 1375.2521 |
| 1428.7423 | 1434.8686 | 1497.9936 |
| 1505.1614 | 1517.2081 | 1527.9759 |
| 1557.9037 | 1562.5885 | 1654.6118 |
| 1664.3289 | 1684.3741 | 1690.9282 |
| 1706.4052 | 1787.4170 | 1797.6675 |
| 1812.1926 | 3096.8197 | 3172.2938 |
| 3195.1621 | 3205.1959 | 3212.4269 |
| 3220.4617 | 3223.2542 | 3231.0911 |
| 3234.5789 | 3242.7356 | 3255.6232 |
| 3267.3317 | 3525.8522 | 3611.1407 |

**Part 2. Quantum-Chemical calculations: optimized geometries for structures involving silver cation.**

TS-N-attack

|   |           |           |           |
|---|-----------|-----------|-----------|
| C | -4.316053 | 0.934202  | -0.646526 |
| C | -2.974947 | 0.655501  | -0.404788 |
| C | -2.595574 | -0.623983 | 0.034185  |
| C | -3.568920 | -1.607099 | 0.208022  |
| C | -4.910165 | -1.325764 | -0.033853 |
| C | -5.280225 | -0.051715 | -0.454169 |
| N | -2.001189 | 1.657319  | -0.538763 |
| C | -0.654586 | 1.406368  | -0.720343 |
| O | 0.148686  | 2.341283  | -0.409834 |
| C | -1.208727 | -0.877910 | 0.368034  |
| C | -0.368743 | -1.337148 | 1.170168  |
| C | 0.885330  | -1.583769 | 1.731016  |
| O | 1.618408  | -0.666438 | 2.198390  |
| N | -0.366795 | 0.174643  | -1.150960 |
| C | 0.931833  | -0.218891 | -1.482764 |
| C | 2.021304  | 0.647566  | -1.715615 |
| C | 3.271054  | 0.134744  | -2.071863 |
| C | 3.476631  | -1.232046 | -2.201469 |
| C | 2.398690  | -2.095127 | -1.998079 |
| C | 1.152364  | -1.599400 | -1.648670 |
| C | 1.367222  | -3.004954 | 1.854086  |
| H | -3.261614 | -2.591013 | 0.547525  |

|    |           |           |           |
|----|-----------|-----------|-----------|
| H  | -5.659911 | -2.098237 | 0.103466  |
| H  | -6.323900 | 0.177036  | -0.647494 |
| H  | -4.600082 | 1.924387  | -0.991213 |
| H  | 2.436646  | -3.046567 | 1.634540  |
| H  | 0.817576  | -3.678683 | 1.193346  |
| H  | 1.219114  | -3.336571 | 2.888218  |
| H  | -2.211053 | 2.587469  | -0.203298 |
| H  | 0.313041  | -2.273437 | -1.516946 |
| H  | 2.529281  | -3.166475 | -2.124449 |
| H  | 4.451753  | -1.621484 | -2.477207 |
| H  | 4.085825  | 0.827727  | -2.264022 |
| H  | 1.872031  | 1.719000  | -1.688841 |
| Ag | 1.468330  | 1.255976  | 1.088123  |

TS-O-attack

|    |           |           |           |
|----|-----------|-----------|-----------|
| C  | 9.452081  | -2.743356 | 1.962976  |
| C  | 10.413218 | -3.739640 | 1.730108  |
| H  | 10.120179 | -4.590014 | 1.123903  |
| C  | 11.695988 | -3.649119 | 2.243576  |
| H  | 12.420429 | -4.431320 | 2.042118  |
| C  | 12.037222 | -2.547372 | 3.028507  |
| H  | 13.035344 | -2.459016 | 3.446818  |
| C  | 11.099656 | -1.562035 | 3.288464  |
| H  | 11.363356 | -0.709744 | 3.909274  |
| C  | 9.803148  | -1.640365 | 2.763214  |
| N  | 8.920252  | -0.607964 | 3.047855  |
| H  | 9.277748  | 0.230827  | 3.482499  |
| C  | 7.595929  | -0.548170 | 2.668308  |
| O  | 7.095618  | -1.624225 | 2.137019  |
| C  | 8.152960  | -2.921714 | 1.349842  |
| C  | 7.478456  | -3.635657 | 0.563320  |
| C  | 6.238297  | -3.926840 | -0.010533 |
| C  | 5.670615  | -5.312123 | 0.166347  |
| H  | 4.579867  | -5.264279 | 0.207020  |
| H  | 5.953541  | -5.918981 | -0.701652 |
| H  | 6.068931  | -5.797119 | 1.060705  |
| O  | 5.586043  | -3.106698 | -0.718639 |
| Ag | 5.571051  | -1.106479 | 0.240323  |
| N  | 6.966655  | 0.565898  | 2.871875  |
| C  | 5.664478  | 0.692531  | 2.410717  |
| C  | 4.556033  | 0.497400  | 3.248265  |
| C  | 3.263163  | 0.694734  | 2.778284  |
| C  | 3.023146  | 1.078701  | 1.457841  |
| C  | 4.104066  | 1.288173  | 0.608148  |
| C  | 5.420724  | 1.098350  | 1.071726  |
| H  | 4.733387  | 0.199185  | 4.276335  |
| H  | 2.425244  | 0.542632  | 3.452893  |
| H  | 2.008910  | 1.230614  | 1.103586  |
| H  | 3.943983  | 1.643808  | -0.405949 |
| H  | 6.266688  | 1.427787  | 0.470040  |
